# Supplementary material for: Functional membrane microdomains and the hydroxamate siderophore transporter ATPase FhuC govern Isd-dependent heme acquisition in Staphylococcus aureus
Source: eLife journal article supplement (doi:10.7554/elife.85304), 2023-04-12
Supplement: fig2-figsupp1-data1 [file Figure 2-supplement 1b-source data.docx]

| Sequence and predicted topologies: (i: inside the membrane, o: outside of the membrane, M: membrane region, u: non-membrane region but location unkown)   |  | 1                                           41 | | --- | --- | | Seq. | MIKNKKKLLF LCLLVILIAT AYISFVTGTI KLSFNDLFTK FTTGSNEAVD | | TOPCONS | iiiiiiiiMM MMMMMMMMMM MMMMMMMMMo oooooooooo oooooooooo | | OCTOPUS | iiiiiiiiMM MMMMMMMMMM MMMMMMMMMo oooooooooo oooooooooo | | Philius | iiiiiiiMMM MMMMMMMMMM MMMMMMMMMo oooooooooo oooooooooo | | PolyPhobius | iiiiiiMMMM MMMMMMMMMM MMMMMMoooo oooooooooo oooooooooo | | SCAMPI | iiiiiiiiiM MMMMMMMMMM MMMMMMMMMM oooooooooo oooooooooo | | SPOCTOPUS | SSSSSSSSSS SSSSSSSSSS SSSooooooo oooooooooo oooooooooo | | [4g1uA](http://www.rcsb.org/pdb/explore/explore.do?structureId=4g1u) | -----iiiiM MMMMMMMMMM MMMMMooooo oooooooo-- -ooooooooo | |  | | |  | 51                                          91 | | Seq. | SIIDLRLPRI LIALMVGAML AVSGALLQAA LQNPLAEANI IGVSSGALIM | | TOPCONS | oooooooMMM MMMMMMMMMM MMMMMMMMii iiiiiiiMMM MMMMMMMMMM | | OCTOPUS | oooooooMMM MMMMMMMMMM MMMMMMMMii iiiiiiiMMM MMMMMMMMMM | | Philius | oooooooooM MMMMMMMMMM MMMMMMMMMM MiiiiiiMMM MMMMMMMMMM | | PolyPhobius | ooooooooMM MMMMMMMMMM MMMMMMMMMi iiiiiiiiMM MMMMMMMMMM | | SCAMPI | ooooooMMMM MMMMMMMMMM MMMMMMMiii iiiiiiiiii iiMMMMMMMM | | SPOCTOPUS | oooooooMMM MMMMMMMMMM MMMMMMMMii iiiiiiiMMM MMMMMMMMMM | | [4g1uA](http://www.rcsb.org/pdb/explore/explore.do?structureId=4g1u) | oooooooooM MMMMMMMMMM MMMMMiiiii iiiiiiiiMM MMMMMMMMMM | |  | | |  | 101                                         141 | | Seq. | RALCMLFIPQ LYFYLPLLSF IGGLIPFLII ILLHSKFRFN AVSMILVGVA | | TOPCONS | MMMMMMMMoo MMMMMMMMMM MMMMMMMMMM Miiiiiiiii iMMMMMMMMM | | OCTOPUS | MMMMMMMMoo MMMMMMMMMM MMMMMMMMMM Miiiiiiiii iMMMMMMMMM | | Philius | MMMMMMMMoo oMMMMMMMMM MMMMMMMMMM MMMMiiiiii MMMMMMMMMM | | PolyPhobius | MMMMMMMMoo oooMMMMMMM MMMMMMMMMM MMMMiiiiii iiiMMMMMMM | | SCAMPI | MMMMMMMMMM MMMoMMMMMM MMMMMMMMMM MMMMMiiiMM MMMMMMMMMM | | SPOCTOPUS | MMMMMMMMoo MMMMMMMMMM MMMMMMMMMM Miiiiiiiii iMMMMMMMMM | | [4g1uA](http://www.rcsb.org/pdb/explore/explore.do?structureId=4g1u) | MMMMoooooo ooooMMMMMM MMMMMMMMMM Miiiiiiiii iiiiiMMMMM | |  | | |  | 151                                         191 | | Seq. | LFVLLNGVLE ILTQNPLMKI PQGLTMKIWS DVYILAVSAL LGLILTLLLS | | TOPCONS | MMMMMMMMMM MMoooooooo oooooooooo ooMMMMMMMM MMMMMMMMMM | | OCTOPUS | MMMMMMMMMM MMoooooooo oooooooooo ooMMMMMMMM MMMMMMMMMM | | Philius | MMMMMMMMMM MMMooooooo oooooooooo oMMMMMMMMM MMMMMMMMMM | | PolyPhobius | MMMMMMMMMM MMMooooooo oooooooooo oooMMMMMMM MMMMMMMMMM | | SCAMPI | MMMMMMMMMo oooooooooo oooooooooM MMMMMMMMMM MMMMMMMMMM | | SPOCTOPUS | MMMMMMMMMM MMoooooooo oooooooooo ooMMMMMMMM MMMMMMMMMM | | [4g1uA](http://www.rcsb.org/pdb/explore/explore.do?structureId=4g1u) | MMMMMMMMMM Mooooooooo oooooooooo oMMMMMMMMM MMMMMMMiii | |  | | |  | 201                                         241 | | Seq. | PKLNLLNLDD IQARSIGFNI DRYRWLTGLL AVFLASATVA IVGQLAFLGI | | TOPCONS | MMMiiiiiii iiiiiiiMMM MMMMMMMMMM MMMMMMMMoM MMMMMMMMMM | | OCTOPUS | MMMiiiiiii iiiiiiiiii iiiMMMMMMM MMMMMMMMoM MMMMMMMMMM | | Philius | MMMMMiiiii iiiiiiiiii iiiiMMMMMM MMMMMMMMMM MMMMMMMMMM | | PolyPhobius | MMMMMiiiii iiiiiiiiii iiiiMMMMMM MMMMMMMMMM MMMMMMMMMM | | SCAMPI | iiiiiiiiii iiiiiiiMMM MMMMMMMMMM MMMMMMMMoM MMMMMMMMMM | | SPOCTOPUS | MMMiiiiiii iiiiiiiiii iiiMMMMMMM MMMMMMMMoM MMMMMMMMMM | | [4g1uA](http://www.rcsb.org/pdb/explore/explore.do?structureId=4g1u) | iiiiiiiiii iiiiiiiiii iiiiiMMMMM MMMMMMMMMM MooMMMMMMM | |  | | |  | 251                                         291 | | Seq. | IVPHVVRKLV GGNYRVLIPF STVIGAWLLL VADLLGRVIQ PPLEIPANAI | | TOPCONS | MMMMMMMMMM iiiiiMMMMM MMMMMMMMMM MMMMMMoooo ooMMMMMMMM | | OCTOPUS | MMMMiiiiii iiiiMMMMMM MMMMMMMMMM MMMMMooooo oMMMMMMMMM | | Philius | Mooooooooo oooooMMMMM MMMMMMMMMM MMMMMMiiii iiiiMMMMMM | | PolyPhobius | MMMooooooo oooooMMMMM MMMMMMMMMM MMMMMMiiii iiiMMMMMMM | | SCAMPI | MMMMMMMMMM iiiiiMMMMM MMMMMMMMMM MMMMMMoooo ooMMMMMMMM | | SPOCTOPUS | MMMMiiiiii iiiiMMMMMM MMMMMMMMMM MMMMMooooo oMMMMMMMMM | | [4g1uA](http://www.rcsb.org/pdb/explore/explore.do?structureId=4g1u) | MMMMMMMMMi iiiiiiiiiM MMMMMMMMMM MMMMMooooo ooooooMMMM | |  | |  |  | 301                   321 | | --- | --- | | Seq. | LMIVGGPMLI YLICQSQRNR I | | TOPCONS | MMMMMMMMMM MMMiiiiiii i | | OCTOPUS | MMMMMMMMMM MMiiiiiiii i | | Philius | MMMMMMMMMM MMMMoooooo o | | PolyPhobius | MMMMMMMMMM MMMMoooooo o | | SCAMPI | MMMMMMMMMM MMMiiiiiii i | | SPOCTOPUS | MMMMMMMMMM MMiiiiiiii i | | [4g1uA](http://www.rcsb.org/pdb/explore/explore.do?structureId=4g1u) | MMMMMMMMMM MMiiiiiiii - | |
| --- | --- | --- | --- | --- | --- | --- | --- | --- | --- | --- | --- | --- | --- | --- | --- | --- | --- | --- | --- | --- | --- | --- | --- | --- | --- | --- | --- | --- | --- | --- | --- | --- | --- | --- | --- | --- | --- | --- | --- | --- | --- | --- | --- | --- | --- | --- | --- | --- | --- | --- | --- | --- | --- | --- | --- | --- | --- | --- | --- | --- | --- | --- | --- | --- | --- | --- | --- | --- | --- | --- | --- | --- | --- | --- | --- | --- | --- | --- | --- | --- | --- | --- | --- | --- | --- | --- | --- | --- | --- | --- | --- | --- | --- | --- | --- | --- | --- | --- | --- | --- | --- | --- | --- | --- | --- | --- | --- | --- | --- | --- | --- | --- | --- | --- | --- | --- | --- | --- | --- | --- | --- | --- | --- | --- | --- | --- | --- | --- | --- | --- | --- | --- | --- | --- | --- | --- | --- | --- |

|  |
| --- |
