# Supplementary material for: Functional membrane microdomains and the hydroxamate siderophore transporter ATPase FhuC govern Isd-dependent heme acquisition in Staphylococcus aureus
Source: eLife journal article supplement (doi:10.7554/elife.85304), 2023-04-12
Supplement: fig2-figsupp1-data1 [file Figure 2-supplement 1c-source data.docx]

CLUSTAL O(1.2.4) multiple sequence alignment

MntB --RPLMISTFDPTFSRMSGLN-------- 19

SirC -IPKMKISILDDPVAIGLGLHVQRMK--- 25

IsdF -----NLLNLDDIQARSIG---------- 14

FhuG KSNTLNIIHTGDNIARGLGVRLSRERLIL 29

SirB ----INILMTSDDIATGLG---------- 15

HtsC ---QLDVLNLGDAVATALGLKVKTIK--- 23

FhuB ----LTILNLGESLAKGLGQ--------- 16

HtsB ------IMELGDDIAKGLGQNINKVR--- 20

: . : *
