# Supplementary material for: Functional membrane microdomains and the hydroxamate siderophore transporter ATPase FhuC govern Isd-dependent heme acquisition in Staphylococcus aureus
Source: eLife journal article supplement (doi:10.7554/elife.85304), 2023-04-12
Supplement: fig3-data1 [file Figure 3b-source data.xlsx]

## Sheet: Tabelle1
DRM	DSM	total	DRM %total signal	DSM %total signal
1060	285	1345	78.8104	21.1896
2060	358	2418	85.1944	14.8056
2020	366	2386	84.6605	15.3395
