# Supplementary material for: Functional membrane microdomains and the hydroxamate siderophore transporter ATPase FhuC govern Isd-dependent heme acquisition in Staphylococcus aureus
Source: eLife journal article supplement (doi:10.7554/elife.85304), 2023-04-12
Supplement: fig3-data1 [file Figure 3c-source data.xlsx]

## Sheet: Tabelle1
	Intensities
	FloA-His	WT		WT = 1	His/WT in fold
20201021	180	43.6			4.12844
20201104	29.5	17.9			1.64804
20201116	27.2	5.53			4.91863
20210113	29.2	12.8			2.28125
				Mean	3.24409
