# Supplementary material for: Functional membrane microdomains and the hydroxamate siderophore transporter ATPase FhuC govern Isd-dependent heme acquisition in Staphylococcus aureus
Source: eLife journal article supplement (doi:10.7554/elife.85304), 2023-04-12
Supplement: fig3-figsupp1-data1 [file Figure 3-supplement 1.xlsx]

## Sheet: Tabelle1
	Intensities input samples
	FloA-His	WT	WT = 1	His/WT in fold
20201021	2780	2260		1.23009
20201104	542	518		1.04633
20201116	613	620		0.98871
20210113	387	406		0.953202
			Mean	1.05458
