# Supplementary material for: Functional membrane microdomains and the hydroxamate siderophore transporter ATPase FhuC govern Isd-dependent heme acquisition in Staphylococcus aureus
Source: eLife journal article supplement (doi:10.7554/elife.85304), 2023-04-12
Supplement: fig4-data1 [file Figure 4b-source data.xlsx]

## Sheet: histogram
maxima proximity [µm]	replicate #1	replicate #2	replicate #3
0	0.0664062	0.0456621	0.0741715
0.0645	0.280469	0.260274	0.295634
0.129	0.24375	0.234018	0.267754
0.1935	0.176563	0.218037	0.185692
0.258	0.128906	0.141553	0.119411
0.3225	0.0726563	0.0742009	0.0415571
0.387	0.0242188	0.0239726	0.0115729
0.4515	0.00234375	0.00114155	0.00157812
0.516	0.0015625	0.00114155	0.00105208
0.5805	0.00234375	0	0.00157812
0.645	0.00078125	0	0

## Sheet: measured distances
replicate #1	replicate #2	replicate #3
0	0	0
0	0	0
0	0	0
0	0	0
0	0	0
0	0	0
0	0	0
0	0	0
0	0	0
0	0	0
0	0	0
0	0	0
0	0	0
0	0	0
0	0	0
0	0	0
0	0	0
0	0	0
0	0	0
0	0	0
0	0	0
0	0	0
0	0	0
0	0	0
0	0	0
0	0	0
0	0	0
0	0	0
0	0	0
0	0	0
0	0	0
0	0	0
0	0	0
0	0	0
0	0	0
0	0	0
0	0	0
0	0	0
0	0.043	0
0	0.0480755	0
0	0.0645	0
0	0.0645	0
0	0.0645	0
0	0.0645	0
0	0.0645	0
0	0.0645	0
0	0.0645	0
0	0.0645	0
0	0.0645	0
0	0.0645	0
0	0.0645	0
0	0.0645	0
0	0.0645	0
0	0.0645	0
0	0.0645	0
0	0.0645	0
0	0.0645	0
0	0.0645	0
0	0.0645	0
0	0.0645	0
0	0.0645	0
0	0.0645	0
0	0.0645	0
0	0.0645	0
0	0.0645	0
0	0.0645	0
0	0.0645	0
0	0.0645	0
0	0.0645	0
0	0.0645	0
0	0.0645	0
0	0.0645	0
0	0.0645	0
0	0.0645	0
0	0.0645	0
0.043	0.0645	0
0.043	0.0645	0
0.043	0.0645	0
0.043	0.0645	0
0.0480755	0.0645	0
0.0480755	0.0645	0
0.0480755	0.0645	0
0.0480755	0.0645	0
0.0480755	0.0645	0
0.0480755	0.0645	0
0.0645	0.0645	0
0.0645	0.0645	0
0.0645	0.0645	0
0.0645	0.0645	0
0.0645	0.0645	0
0.0645	0.0645	0
0.0645	0.0645	0
0.0645	0.0645	0
0.0645	0.0645	0
0.0645	0.0645	0
0.0645	0.0645	0
0.0645	0.0645	0
0.0645	0.0645	0
0.0645	0.0645	0
0.0645	0.0645	0
0.0645	0.0645	0
0.0645	0.0645	0
0.0645	0.0645	0
0.0645	0.0645	0
0.0645	0.0645	0
0.0645	0.0645	0
0.0645	0.0645	0
0.0645	0.0645	0
0.0645	0.0645	0
0.0645	0.0645	0
0.0645	0.0645	0
0.0645	0.0645	0
0.0645	0.0645	0
0.0645	0.0645	0
0.0645	0.0645	0
0.0645	0.0645	0
0.0645	0.0645	0
0.0645	0.0645	0
0.0645	0.0645	0
0.0645	0.0645	0
0.0645	0.0645	0
0.0645	0.0645	0
0.0645	0.067989	0.043
0.0645	0.0734056	0.043
0.0645	0.0734056	0.043
0.0645	0.0734056	0.0480755
0.0645	0.0734056	0.0480755
0.0645	0.0734056	0.0480755
0.0645	0.0734056	0.0480755
0.0645	0.0775194	0.0480755
0.0645	0.0775194	0.0480755
0.0645	0.086	0.0480755
0.0645	0.086	0.0480755
0.0645	0.086	0.0480755
0.0645	0.086	0.0480755
0.0645	0.086	0.0480755
0.0645	0.086	0.0480755
0.0645	0.0886468	0.0480755
0.0645	0.0910755	0.0608112
0.0645	0.0910755	0.0608112
0.0645	0.0910755	0.0608112
0.0645	0.0910755	0.0645
0.0645	0.0910755	0.0645
0.0645	0.0910755	0.0645
0.0645	0.0910755	0.0645
0.0645	0.0910755	0.0645
0.0645	0.0910755	0.0645
0.0645	0.0910755	0.0645
0.0645	0.0910755	0.0645
0.0645	0.0912168	0.0645
0.0645	0.0912168	0.0645
0.0645	0.0912168	0.0645
0.0645	0.0912168	0.0645
0.0645	0.0912168	0.0645
0.0645	0.0912168	0.0645
0.0645	0.0912168	0.0645
0.0645	0.0912168	0.0645
0.0645	0.0912168	0.0645
0.0645	0.0912168	0.0645
0.0645	0.0912168	0.0645
0.0645	0.0912168	0.0645
0.0645	0.0912168	0.0645
0.0645	0.0912168	0.0645
0.0645	0.0912168	0.0645
0.0645	0.0912168	0.0645
0.0645	0.0912168	0.0645
0.0645	0.0912168	0.0645
0.0645	0.0912168	0.0645
0.0645	0.0912168	0.0645
0.0645	0.0912168	0.0645
0.0645	0.0912168	0.0645
0.0645	0.0912168	0.0645
0.0645	0.0912168	0.0645
0.0645	0.0912168	0.0645
0.0645	0.0912168	0.0645
0.0645	0.0912168	0.0645
0.0645	0.0912168	0.0645
0.0645	0.0912168	0.0645
0.0645	0.0912168	0.0645
0.0645	0.0912168	0.0645
0.0645	0.0912168	0.0645
0.0645	0.0912168	0.0645
0.0645	0.0912168	0.0645
0.0645	0.0912168	0.0645
0.0645	0.0912168	0.0645
0.0645	0.0912168	0.0645
0.0645	0.0912168	0.0645
0.0645	0.0912168	0.0645
0.0645	0.0912168	0.0645
0.0645	0.0912168	0.0645
0.0645	0.0912168	0.0645
0.0645	0.0912168	0.0645
0.0645	0.0912168	0.0645
0.0645	0.0912168	0.0645
0.0645	0.0912168	0.0645
0.0645	0.0912168	0.0645
0.0645	0.0912168	0.0645
0.0645	0.0961509	0.0645
0.0645	0.103811	0.0645
0.0645	0.103811	0.0645
0.0645	0.103811	0.0645
0.0645	0.103811	0.0645
0.0645	0.103811	0.0645
0.0645	0.103811	0.0645
0.0645	0.103811	0.0645
0.0645	0.103811	0.0645
0.0645	0.103811	0.0645
0.0645	0.103811	0.0645
0.0645	0.103811	0.0645
0.0645	0.103811	0.0645
0.0645	0.103811	0.0645
0.0645	0.103811	0.0645
0.0645	0.103811	0.0645
0.0645	0.103811	0.0645
0.0645	0.103811	0.0645
0.0645	0.103811	0.0645
0.0645	0.1075	0.0645
0.0645	0.1075	0.0645
0.0645	0.1075	0.0645
0.0645	0.1075	0.0645
0.0734056	0.1075	0.0645
0.0734056	0.1075	0.0645
0.0734056	0.108887	0.0645
0.0734056	0.108887	0.0645
0.0734056	0.108887	0.0645
0.0734056	0.108887	0.0645
0.0734056	0.108887	0.0645
0.0734056	0.108887	0.0645
0.0734056	0.108887	0.0645
0.0734056	0.109629	0.0645
0.0734056	0.109629	0.0645
0.0775194	0.110989	0.0645
0.0775194	0.110989	0.0645
0.0775194	0.110989	0.0645
0.0775194	0.110989	0.0645
0.086	0.110989	0.0645
0.086	0.110989	0.0645
0.086	0.110989	0.0645
0.086	0.110989	0.0645
0.086	0.110989	0.0645
0.086	0.110989	0.0645
0.086	0.110989	0.0645
0.086	0.110989	0.0645
0.086	0.110989	0.0645
0.086	0.110989	0.0645
0.086	0.115781	0.0645
0.086	0.120519	0.0645
0.0886468	0.120519	0.0645
0.0910755	0.120519	0.0645
0.0910755	0.120519	0.0645
0.0910755	0.120519	0.0645
0.0910755	0.120519	0.0645
0.0910755	0.120519	0.0645
0.0910755	0.121622	0.0645
0.0910755	0.121622	0.0645
0.0910755	0.121622	0.0645
0.0910755	0.125311	0.0645
0.0910755	0.125311	0.0645
0.0912168	0.125311	0.0645
0.0912168	0.125311	0.0645
0.0912168	0.125311	0.0645
0.0912168	0.125311	0.0645
0.0912168	0.125311	0.0645
0.0912168	0.125311	0.0645
0.0912168	0.125365	0.0645
0.0912168	0.125365	0.0645
0.0912168	0.125365	0.0645
0.0912168	0.1288	0.0645
0.0912168	0.129	0.0645
0.0912168	0.129	0.0645
0.0912168	0.129	0.0645
0.0912168	0.129	0.0645
0.0912168	0.129	0.0645
0.0912168	0.129	0.0645
0.0912168	0.129	0.0645
0.0912168	0.129	0.0645
0.0912168	0.129	0.0645
0.0912168	0.129	0.0645
0.0912168	0.129	0.0645
0.0912168	0.129	0.0645
0.0912168	0.129	0.0645
0.0912168	0.129	0.0645
0.0912168	0.129	0.0645
0.0912168	0.129	0.0645
0.0912168	0.129	0.0645
0.0912168	0.129	0.0645
0.0912168	0.129	0.0645
0.0912168	0.129	0.0645
0.0912168	0.131647	0.0645
0.0912168	0.131647	0.0645
0.0912168	0.131647	0.0645
0.0912168	0.131647	0.0645
0.0912168	0.134075	0.0645
0.0912168	0.134075	0.0645
0.0912168	0.134075	0.0645
0.0912168	0.134075	0.0645
0.0912168	0.134075	0.0645
0.0912168	0.134075	0.0645
0.0912168	0.134217	0.0645
0.0912168	0.134217	0.0645
0.0912168	0.134217	0.0645
0.0912168	0.138331	0.0645
0.0912168	0.138331	0.0645
0.0912168	0.138331	0.0645
0.0912168	0.138331	0.0645
0.0912168	0.138331	0.0645
0.0912168	0.139151	0.0645
0.0912168	0.139151	0.0645
0.0912168	0.139151	0.0645
0.0912168	0.139151	0.0645
0.0912168	0.139151	0.0645
0.0912168	0.139151	0.0645
0.0912168	0.144226	0.0645
0.0912168	0.144226	0.0645
0.0912168	0.144226	0.0645
0.0912168	0.144226	0.0645
0.0912168	0.144226	0.0645
0.0912168	0.144226	0.0645
0.0912168	0.144226	0.0645
0.0912168	0.144226	0.0645
0.0912168	0.144226	0.0645
0.0912168	0.144226	0.0645
0.0912168	0.144226	0.0645
0.0912168	0.144226	0.0645
0.0912168	0.144226	0.0645
0.0912168	0.144226	0.0645
0.0912168	0.144226	0.0645
0.0912168	0.144226	0.0645
0.0912168	0.144226	0.067989
0.0912168	0.144226	0.067989
0.0912168	0.144226	0.067989
0.0912168	0.144226	0.067989
0.0912168	0.144226	0.0734056
0.0912168	0.144226	0.0734056
0.0912168	0.144226	0.0734056
0.0912168	0.144226	0.0734056
0.0912168	0.144226	0.0734056
0.0912168	0.144226	0.0734056
0.0912168	0.144226	0.0734056
0.0912168	0.144226	0.0734056
0.0912168	0.144226	0.0734056
0.0912168	0.144226	0.0734056
0.0912168	0.144226	0.0734056
0.0912168	0.144226	0.0734056
0.0961509	0.144226	0.0734056
0.0961509	0.146811	0.0734056
0.103811	0.146811	0.0734056
0.103811	0.146811	0.0734056
0.103811	0.146811	0.0734056
0.103811	0.146811	0.0734056
0.103811	0.149458	0.0734056
0.103811	0.149458	0.0734056
0.103811	0.149458	0.0775194
0.103811	0.149458	0.086
0.103811	0.149458	0.086
0.103811	0.1505	0.086
0.1075	0.1505	0.086
0.1075	0.1505	0.086
0.1075	0.1505	0.086
0.1075	0.1505	0.086
0.1075	0.1505	0.086
0.108887	0.1505	0.086
0.108887	0.152028	0.086
0.108887	0.152028	0.086
0.108887	0.152028	0.086
0.108887	0.152629	0.086
0.108887	0.152629	0.086
0.108887	0.152629	0.086
0.108887	0.152629	0.086
0.108887	0.152629	0.086
0.108887	0.153989	0.086
0.108887	0.153989	0.086
0.108887	0.153989	0.086
0.108887	0.153989	0.086
0.108887	0.155039	0.086
0.108887	0.156962	0.086
0.110989	0.156962	0.086
0.110989	0.156962	0.086
0.110989	0.156962	0.086
0.110989	0.156962	0.086
0.110989	0.156962	0.086
0.110989	0.156962	0.086
0.110989	0.156962	0.0886468
0.110989	0.156962	0.0886468
0.110989	0.156962	0.0910755
0.110989	0.156962	0.0910755
0.110989	0.158781	0.0910755
0.110989	0.158781	0.0910755
0.110989	0.158781	0.0910755
0.110989	0.158781	0.0910755
0.110989	0.158781	0.0910755
0.110989	0.158781	0.0910755
0.110989	0.160651	0.0910755
0.115781	0.160651	0.0910755
0.120519	0.160651	0.0910755
0.120519	0.163519	0.0910755
0.120519	0.163519	0.0910755
0.120519	0.163519	0.0910755
0.120519	0.163519	0.0910755
0.120519	0.163739	0.0910755
0.120519	0.16414	0.0910755
0.120519	0.16414	0.0910755
0.120519	0.16414	0.0910755
0.120519	0.16414	0.0910755
0.120519	0.164622	0.0910755
0.120519	0.16792	0.0910755
0.121622	0.168311	0.0910755
0.121622	0.168311	0.0910755
0.121622	0.168311	0.0910755
0.121622	0.168311	0.0910755
0.121622	0.168311	0.0910755
0.121622	0.168365	0.0910755
0.121622	0.168365	0.0910755
0.125311	0.17044	0.0910755
0.125311	0.17044	0.0910755
0.125311	0.17044	0.0910755
0.125311	0.172	0.0910755
0.125311	0.172	0.0910755
0.125311	0.17367	0.0910755
0.125311	0.17367	0.0910755
0.125311	0.173779	0.0910755
0.125311	0.173779	0.0912168
0.125311	0.174647	0.0912168
0.125311	0.174647	0.0912168
0.125311	0.174647	0.0912168
0.125365	0.174647	0.0912168
0.1288	0.174647	0.0912168
0.1288	0.176592	0.0912168
0.1288	0.176592	0.0912168
0.1288	0.176592	0.0912168
0.1288	0.176592	0.0912168
0.1288	0.178978	0.0912168
0.1288	0.178978	0.0912168
0.1288	0.178978	0.0912168
0.1288	0.178978	0.0912168
0.1288	0.178978	0.0912168
0.1288	0.178978	0.0912168
0.1288	0.178978	0.0912168
0.1288	0.180667	0.0912168
0.1288	0.180667	0.0912168
0.1288	0.182151	0.0912168
0.1288	0.182151	0.0912168
0.1288	0.182151	0.0912168
0.1288	0.182151	0.0912168
0.129	0.182151	0.0912168
0.129	0.182434	0.0912168
0.129	0.182434	0.0912168
0.129	0.182434	0.0912168
0.129	0.182434	0.0912168
0.129	0.182434	0.0912168
0.129	0.182434	0.0912168
0.129	0.182434	0.0912168
0.129	0.182434	0.0912168
0.129	0.182434	0.0912168
0.129	0.182434	0.0912168
0.129	0.184798	0.0912168
0.129	0.184798	0.0912168
0.129	0.184798	0.0912168
0.129	0.18495	0.0912168
0.129	0.186177	0.0912168
0.129	0.186177	0.0912168
0.129	0.186177	0.0912168
0.129	0.186177	0.0912168
0.129	0.187226	0.0912168
0.129	0.187226	0.0912168
0.129	0.187226	0.0912168
0.129	0.187368	0.0912168
0.129	0.187368	0.0912168
0.129	0.187368	0.0912168
0.129	0.191591	0.0912168
0.129	0.192302	0.0912168
0.129	0.192302	0.0912168
0.129	0.192302	0.0912168
0.129	0.1935	0.0912168
0.129	0.1935	0.0912168
0.129	0.1935	0.0912168
0.129	0.1935	0.0912168
0.129	0.1935	0.0912168
0.129	0.1935	0.0912168
0.129	0.1935	0.0912168
0.129	0.1935	0.0912168
0.129	0.1935	0.0912168
0.129	0.1935	0.0912168
0.129	0.1935	0.0912168
0.129	0.1935	0.0912168
0.129	0.195028	0.0912168
0.129	0.195028	0.0912168
0.129	0.195028	0.0912168
0.129	0.195028	0.0912168
0.129	0.195629	0.0912168
0.130779	0.196789	0.0912168
0.131647	0.196989	0.0912168
0.131647	0.196989	0.0912168
0.131647	0.196989	0.0912168
0.131647	0.198039	0.0912168
0.131647	0.198478	0.0912168
0.134075	0.198478	0.0912168
0.134075	0.199142	0.0912168
0.134075	0.199142	0.0912168
0.134075	0.199142	0.0912168
0.134075	0.199142	0.0912168
0.134075	0.199522	0.0912168
0.134075	0.199522	0.0912168
0.134075	0.199522	0.0912168
0.134217	0.199522	0.0912168
0.134217	0.201781	0.0912168
0.134217	0.203651	0.0912168
0.134217	0.203651	0.0912168
0.134217	0.203651	0.0912168
0.135978	0.203651	0.0912168
0.138331	0.203967	0.0912168
0.138331	0.203967	0.0912168
0.138331	0.203967	0.0912168
0.138331	0.203967	0.0912168
0.138331	0.203967	0.0912168
0.138331	0.203967	0.0912168
0.139151	0.203967	0.0912168
0.139151	0.203967	0.0912168
0.139151	0.203967	0.0912168
0.139151	0.203967	0.0912168
0.139151	0.203967	0.0912168
0.144226	0.205038	0.0912168
0.144226	0.205038	0.0912168
0.144226	0.205038	0.0912168
0.144226	0.20578	0.0912168
0.144226	0.20578	0.0961509
0.144226	0.206519	0.103811
0.144226	0.206519	0.103811
0.144226	0.206739	0.103811
0.144226	0.207622	0.103811
0.144226	0.207622	0.103811
0.144226	0.207622	0.103811
0.144226	0.207622	0.103811
0.144226	0.210269	0.103811
0.144226	0.21092	0.103811
0.144226	0.21092	0.103811
0.144226	0.211311	0.103811
0.144226	0.211365	0.103811
0.144226	0.211365	0.103811
0.144226	0.211365	0.103811
0.144226	0.211365	0.103811
0.144226	0.211932	0.103811
0.144226	0.211932	0.103811
0.144226	0.212839	0.103811
0.144226	0.212839	0.103811
0.144226	0.212839	0.103811
0.144226	0.212839	0.103811
0.144226	0.212839	0.103811
0.144226	0.213497	0.103811
0.144226	0.215	0.1075
0.144226	0.215	0.1075
0.144226	0.215	0.1075
0.144226	0.216339	0.1075
0.144226	0.216339	0.1075
0.144226	0.216339	0.1075
0.144226	0.217334	0.1075
0.144226	0.217773	0.1075
0.144226	0.219258	0.1075
0.144226	0.220217	0.1075
0.144226	0.220294	0.1075
0.144226	0.220294	0.1075
0.144226	0.221516	0.1075
0.144226	0.221516	0.1075
0.144226	0.221516	0.1075
0.146811	0.221978	0.1075
0.146811	0.221978	0.1075
0.146811	0.221978	0.108887
0.146811	0.221978	0.108887
0.146811	0.221978	0.108887
0.146811	0.221978	0.108887
0.146811	0.221978	0.108887
0.146811	0.223667	0.108887
0.149458	0.223667	0.108887
0.149458	0.223667	0.108887
0.149458	0.223667	0.108887
0.149458	0.223667	0.108887
0.149458	0.224467	0.108887
0.149458	0.22455	0.108887
0.149458	0.22455	0.108887
0.149458	0.22455	0.108887
0.149458	0.225151	0.108887
0.1505	0.225151	0.108887
0.1505	0.225151	0.108887
0.1505	0.225434	0.108887
0.1505	0.225434	0.108887
0.1505	0.226696	0.108887
0.1505	0.226696	0.108887
0.1505	0.226696	0.108887
0.152028	0.226696	0.108887
0.152028	0.22693	0.108887
0.152028	0.22693	0.108887
0.152028	0.229122	0.108887
0.152028	0.229122	0.108887
0.152629	0.230226	0.108887
0.152629	0.231251	0.108887
0.152629	0.232129	0.109629
0.152629	0.232129	0.109629
0.152629	0.232558	0.109629
0.152629	0.232558	0.110989
0.152629	0.232558	0.110989
0.152629	0.232558	0.110989
0.152629	0.233818	0.110989
0.153989	0.23415	0.110989
0.153989	0.23415	0.110989
0.153989	0.23415	0.110989
0.153989	0.23415	0.110989
0.153989	0.235302	0.110989
0.153989	0.2365	0.110989
0.153989	0.2365	0.110989
0.153989	0.237403	0.110989
0.153989	0.237403	0.110989
0.153989	0.237691	0.110989
0.155039	0.237691	0.110989
0.156522	0.237691	0.110989
0.156962	0.238028	0.110989
0.156962	0.238028	0.110989
0.156962	0.238028	0.110989
0.156962	0.238105	0.110989
0.156962	0.238105	0.110989
0.156962	0.240377	0.110989
0.156962	0.240377	0.110989
0.156962	0.241039	0.110989
0.156962	0.24122	0.110989
0.156962	0.24122	0.110989
0.156962	0.24122	0.110989
0.156962	0.24122	0.110989
0.156962	0.24122	0.110989
0.158781	0.24122	0.110989
0.158781	0.242522	0.110989
0.158781	0.243245	0.110989
0.158781	0.243478	0.110989
0.160651	0.243478	0.110989
0.160651	0.243478	0.110989
0.160651	0.243478	0.110989
0.160651	0.245607	0.115781
0.160651	0.245761	0.120519
0.163519	0.245761	0.120519
0.163519	0.245761	0.120519
0.163519	0.246651	0.120519
0.163519	0.246651	0.120519
0.163519	0.248179	0.120519
0.163519	0.248179	0.120519
0.163739	0.248179	0.120519
0.163739	0.249739	0.120519
0.163739	0.250622	0.120519
0.16414	0.250622	0.120519
0.16414	0.25119	0.120519
0.16414	0.25119	0.120519
0.16414	0.25119	0.120519
0.16414	0.25119	0.120519
0.16414	0.25119	0.120519
0.16414	0.252402	0.120519
0.16414	0.252673	0.120519
0.16414	0.252673	0.120519
0.168311	0.252673	0.120519
0.168311	0.252673	0.120519
0.168311	0.252673	0.120519
0.168311	0.253113	0.120519
0.168365	0.25392	0.120519
0.168365	0.254311	0.120519
0.168365	0.25475	0.120519
0.168365	0.255502	0.120519
0.168365	0.255502	0.121622
0.168365	0.2576	0.121622
0.168365	0.258	0.121622
0.17044	0.258	0.121622
0.17044	0.258	0.121622
0.17044	0.258	0.121622
0.17044	0.258	0.121622
0.17044	0.258	0.121622
0.17044	0.258894	0.121622
0.17044	0.259031	0.121622
0.172	0.259031	0.121622
0.172	0.259031	0.125311
0.172	0.25929	0.125311
0.172	0.259339	0.125311
0.172	0.25989	0.125311
0.172	0.25989	0.125311
0.172	0.261343	0.125311
0.17367	0.262539	0.125311
0.17367	0.262539	0.125311
0.17367	0.263294	0.125311
0.17367	0.263294	0.125311
0.17367	0.264071	0.125311
0.17367	0.264071	0.125365
0.17367	0.264356	0.1288
0.173779	0.264356	0.1288
0.173779	0.264778	0.1288
0.173779	0.264778	0.1288
0.173779	0.264978	0.1288
0.174647	0.268151	0.1288
0.174647	0.269489	0.1288
0.174647	0.269696	0.1288
0.174647	0.27082	0.1288
0.176592	0.271548	0.1288
0.176592	0.271956	0.1288
0.176592	0.273444	0.1288
0.177217	0.273444	0.1288
0.178978	0.273645	0.1288
0.178978	0.27365	0.1288
0.178978	0.27365	0.1288
0.178978	0.27365	0.1288
0.178978	0.274562	0.1288
0.180667	0.275811	0.129
0.182151	0.276884	0.129
0.182151	0.276884	0.129
0.182151	0.278145	0.129
0.182151	0.278302	0.129
0.182151	0.278584	0.129
0.182151	0.279847	0.129
0.182151	0.279847	0.129
0.182434	0.279847	0.129
0.182434	0.280069	0.129
0.182434	0.280204	0.129
0.182434	0.280475	0.129
0.182434	0.280691	0.129
0.182434	0.283377	0.129
0.182434	0.283377	0.129
0.182434	0.283377	0.129
0.182434	0.28422	0.129
0.182434	0.28422	0.129
0.182434	0.284794	0.129
0.182434	0.286245	0.129
0.182434	0.288006	0.129
0.182434	0.288006	0.129
0.182434	0.289359	0.129
0.184798	0.289359	0.129
0.184798	0.290842	0.129
0.184798	0.292373	0.129
0.184798	0.292739	0.129
0.184798	0.293731	0.129
0.184798	0.293731	0.129
0.184798	0.294371	0.129
0.184798	0.294371	0.129
0.186122	0.294371	0.129
0.186177	0.294371	0.129
0.186177	0.294371	0.129
0.186177	0.294651	0.129
0.187226	0.294651	0.129
0.187226	0.294961	0.129
0.187226	0.294961	0.129
0.187368	0.29775	0.129
0.189611	0.29775	0.129
0.189611	0.298839	0.129
0.189611	0.298839	0.129
0.189811	0.298982	0.129
0.189811	0.299265	0.129
0.191591	0.300118	0.129
0.191591	0.301	0.129
0.191591	0.301189	0.129
0.191591	0.301894	0.129
0.191591	0.301894	0.129
0.191591	0.301894	0.129
0.192302	0.303898	0.129
0.192302	0.305258	0.129
0.192302	0.305318	0.129
0.1935	0.305318	0.131647
0.1935	0.305441	0.131647
0.1935	0.305441	0.131647
0.1935	0.305539	0.131647
0.1935	0.305949	0.131647
0.1935	0.306294	0.131647
0.1935	0.306294	0.131647
0.1935	0.306294	0.131647
0.1935	0.307978	0.131647
0.194691	0.30899	0.131647
0.195028	0.30899	0.131647
0.195028	0.310467	0.131647
0.195028	0.311151	0.131647
0.195629	0.311542	0.131647
0.195629	0.311561	0.131647
0.195629	0.312462	0.131647
0.195629	0.313271	0.131647
0.195629	0.313271	0.134075
0.196789	0.314548	0.134075
0.196789	0.314956	0.134075
0.196789	0.316313	0.134075
0.196989	0.317562	0.134075
0.196989	0.318334	0.134075
0.198039	0.318778	0.134075
0.198039	0.318778	0.134075
0.198478	0.319674	0.134075
0.198478	0.319843	0.134075
0.198478	0.320597	0.134217
0.198478	0.320597	0.134217
0.199142	0.320618	0.134217
0.199142	0.320618	0.134217
0.199522	0.320928	0.134217
0.199522	0.3225	0.134217
0.199522	0.3225	0.135978
0.199522	0.323475	0.135978
0.199522	0.325788	0.137667
0.201781	0.326751	0.138331
0.203651	0.327039	0.138331
0.203651	0.327713	0.138331
0.203651	0.328377	0.138331
0.203651	0.328709	0.138331
0.203651	0.328887	0.138331
0.203651	0.329321	0.138331
0.203651	0.331138	0.138331
0.203651	0.331138	0.138331
0.203651	0.332332	0.138331
0.203651	0.334198	0.138331
0.203967	0.334198	0.138331
0.203967	0.335432	0.138331
0.203967	0.335432	0.138331
0.203967	0.336146	0.138331
0.203967	0.336528	0.138331
0.203967	0.336528	0.138331
0.203967	0.336528	0.138331
0.203967	0.336528	0.138331
0.205038	0.337472	0.139151
0.205038	0.338956	0.139151
0.205038	0.340311	0.139151
0.205038	0.340311	0.139151
0.20578	0.341033	0.139151
0.20578	0.341137	0.139151
0.206519	0.341289	0.139151
0.206519	0.341289	0.139151
0.206519	0.342978	0.139151
0.206519	0.342978	0.139151
0.206739	0.345072	0.139151
0.206739	0.346882	0.139151
0.206739	0.347657	0.139151
0.207622	0.350833	0.144226
0.207622	0.350833	0.144226
0.210269	0.353184	0.144226
0.21092	0.353243	0.144226
0.211311	0.354151	0.144226
0.211365	0.355045	0.144226
0.211932	0.355045	0.144226
0.211932	0.355236	0.144226
0.211932	0.355936	0.144226
0.211932	0.355936	0.144226
0.211932	0.356045	0.144226
0.211932	0.35771	0.144226
0.211932	0.357869	0.144226
0.211932	0.358592	0.144226
0.212839	0.360444	0.144226
0.212839	0.364867	0.144226
0.212839	0.365545	0.144226
0.213497	0.366216	0.144226
0.215	0.368107	0.144226
0.215	0.369758	0.144226
0.215	0.375514	0.144226
0.21585	0.375651	0.144226
0.21585	0.376477	0.144226
0.216072	0.376477	0.144226
0.216339	0.379505	0.144226
0.216339	0.380432	0.144226
0.216339	0.381116	0.144226
0.216339	0.381116	0.144226
0.216339	0.384027	0.144226
0.216339	0.385264	0.144226
0.216339	0.392514	0.144226
0.216779	0.394872	0.144226
0.216779	0.39494	0.144226
0.216779	0.396551	0.144226
0.217334	0.398419	0.144226
0.217334	0.399045	0.144226
0.217647	0.403444	0.144226
0.217647	0.407934	0.144226
0.217773	0.410075	0.144226
0.220217	0.412377	0.144226
0.220294	0.414054	0.144226
0.220294	0.415478	0.144226
0.220294	0.415771	0.144226
0.221356	0.424431	0.144226
0.221516	0.427688	0.144226
0.221516	0.428945	0.144226
0.221516	0.434572	0.144226
0.221516	0.436188	0.144226
0.221516	0.446444	0.144226
0.221978	0.449101	0.146811
0.221978	0.479148	0.146811
0.221978	0.511888	0.146811
0.221978		0.146811
0.221978		0.146811
0.223667		0.146811
0.223667		0.146811
0.22455		0.146811
0.22455		0.146811
0.22455		0.146811
0.225151		0.146811
0.225151		0.146811
0.225151		0.146811
0.226696		0.146811
0.226696		0.146811
0.226696		0.149458
0.22693		0.149458
0.22693		0.149458
0.22693		0.149458
0.22693		0.149458
0.22795		0.149458
0.22795		0.149458
0.22795		0.149458
0.22795		0.149458
0.22795		0.1505
0.22795		0.1505
0.228732		0.1505
0.228732		0.1505
0.229122		0.1505
0.229122		0.1505
0.229122		0.1505
0.230226		0.1505
0.232129		0.1505
0.232129		0.1505
0.232129		0.1505
0.232129		0.1505
0.232558		0.1505
0.232558		0.1505
0.232558		0.1505
0.232558		0.1505
0.232558		0.1505
0.232811		0.1505
0.232811		0.1505
0.233818		0.1505
0.23415		0.1505
0.23415		0.1505
0.23415		0.1505
0.235302		0.1505
0.235302		0.1505
0.235302		0.1505
0.2365		0.1505
0.2365		0.1505
0.2365		0.1505
0.2365		0.1505
0.2365		0.1505
0.237403		0.1505
0.237403		0.1505
0.237403		0.1505
0.237403		0.1505
0.237691		0.1505
0.238028		0.1505
0.238629		0.1505
0.240377		0.1505
0.240377		0.1505
0.24122		0.1505
0.24122		0.1505
0.24122		0.152028
0.24122		0.152028
0.242522		0.152028
0.242522		0.152028
0.243478		0.152028
0.243478		0.152028
0.243685		0.152028
0.244507		0.152629
0.245761		0.152629
0.246255		0.152629
0.246651		0.152629
0.246651		0.152629
0.246967		0.152629
0.246967		0.152629
0.246967		0.152629
0.246988		0.152629
0.248179		0.153989
0.248179		0.153989
0.248179		0.153989
0.248179		0.155039
0.249739		0.155039
0.249739		0.156522
0.249739		0.156962
0.249739		0.156962
0.25119		0.156962
0.25119		0.156962
0.251651		0.156962
0.251759		0.156962
0.252402		0.156962
0.252673		0.156962
0.253113		0.156962
0.253113		0.156962
0.253113		0.156962
0.25392		0.156962
0.25392		0.156962
0.254365		0.156962
0.254365		0.156962
0.254365		0.156962
0.25475		0.156962
0.25475		0.156962
0.255839		0.156962
0.2576		0.156962
0.2576		0.156962
0.258		0.158781
0.258		0.158781
0.259031		0.158781
0.259031		0.158781
0.259031		0.158781
0.259072		0.158781
0.25929		0.158781
0.25929		0.158781
0.259339		0.158781
0.259339		0.158781
0.259339		0.158781
0.259339		0.158781
0.259339		0.158781
0.259779		0.158781
0.259779		0.158781
0.25989		0.158781
0.25989		0.160651
0.261343		0.160651
0.262258		0.160651
0.262539		0.160651
0.263294		0.163519
0.263642		0.163519
0.264071		0.163519
0.264071		0.163519
0.264071		0.163519
0.264071		0.163519
0.264071		0.163519
0.264356		0.163739
0.264978		0.16414
0.26594		0.16414
0.267467		0.16414
0.268151		0.16414
0.268151		0.16414
0.268434		0.16414
0.26851		0.16414
0.269489		0.16414
0.269489		0.16414
0.269489		0.16414
0.269489		0.16414
0.269489		0.16414
0.269696		0.16414
0.27082		0.164622
0.27082		0.164622
0.271548		0.164622
0.271956		0.164622
0.273226		0.168311
0.273226		0.168311
0.273444		0.168311
0.27365		0.168311
0.274562		0.168311
0.274562		0.168311
0.275558		0.168311
0.275558		0.168311
0.276661		0.168311
0.278302		0.168311
0.278302		0.168311
0.278584		0.168311
0.2795		0.168311
0.2795		0.168311
0.279847		0.168311
0.280069		0.168365
0.280404		0.168365
0.280691		0.168365
0.280691		0.168365
0.280691		0.168365
0.281028		0.168365
0.283377		0.168365
0.284039		0.168365
0.284794		0.17044
0.284794		0.17044
0.285278		0.17044
0.285278		0.17044
0.285361		0.17044
0.285361		0.17044
0.285522		0.17044
0.285522		0.172
0.286922		0.172
0.288138		0.172
0.288138		0.172
0.288453		0.172
0.288453		0.172
0.288831		0.172
0.289359		0.172
0.289651		0.172
0.289934		0.172
0.289967		0.172
0.289967		0.173339
0.290842		0.173339
0.290842		0.173339
0.290842		0.17367
0.290842		0.17367
0.2925		0.17367
0.2925		0.17367
0.292739		0.17367
0.293369		0.17367
0.293731		0.17367
0.293731		0.17367
0.294371		0.17367
0.294371		0.17367
0.29775		0.17367
0.298916		0.17367
0.298982		0.173779
0.298982		0.173779
0.299265		0.173779
0.299717		0.173779
0.299717		0.173779
0.300118		0.173779
0.300118		0.173779
0.301		0.173779
0.301		0.173779
0.301189		0.173779
0.301189		0.174647
0.301189		0.174647
0.301189		0.174647
0.301189		0.174647
0.301189		0.174647
0.301189		0.176592
0.301894		0.176592
0.302072		0.176592
0.302072		0.176592
0.302339		0.176592
0.302659		0.176592
0.302779		0.176592
0.304056		0.176592
0.304056		0.176592
0.304559		0.176592
0.304559		0.176592
0.305258		0.176592
0.305258		0.176592
0.305318		0.177217
0.305441		0.177217
0.306572		0.177217
0.306572		0.177217
0.307356		0.177294
0.307978		0.177294
0.30894		0.178978
0.30894		0.178978
0.309316		0.178978
0.309316		0.178978
0.310077		0.178978
0.310467		0.180667
0.310467		0.180667
0.311151		0.180667
0.311151		0.180667
0.311542		0.180667
0.311542		0.180667
0.312696		0.180667
0.312696		0.180667
0.313271		0.180667
0.313924		0.180667
0.314961		0.180667
0.315122		0.180667
0.316313		0.182151
0.317507		0.182151
0.317507		0.182151
0.317507		0.182151
0.317562		0.182151
0.317562		0.182151
0.318412		0.182151
0.318558		0.182151
0.318811		0.182151
0.319674		0.182151
0.319705		0.182151
0.320618		0.182151
0.32237		0.182151
0.3225		0.182151
0.3225		0.182151
0.3225		0.182151
0.3225		0.182151
0.323326		0.182151
0.323326		0.182434
0.323475		0.182434
0.324699		0.182434
0.324699		0.182434
0.325788		0.182434
0.326377		0.182434
0.326377		0.182434
0.326377		0.183696
0.326377		0.184798
0.326751		0.184798
0.328377		0.184798
0.328887		0.184798
0.329245		0.184798
0.329321		0.184798
0.329846		0.18495
0.330205		0.186122
0.330205		0.186122
0.330669		0.186177
0.332332		0.186177
0.332767		0.186177
0.332767		0.186177
0.332967		0.186177
0.333626		0.186177
0.333626		0.187226
0.334198		0.187226
0.334462		0.187226
0.334462		0.187226
0.335432		0.187226
0.336146		0.187226
0.336528		0.187226
0.336528		0.187368
0.338809		0.187368
0.338956		0.187368
0.339396		0.187368
0.340311		0.189611
0.340311		0.189611
0.340311		0.189811
0.34088		0.189811
0.341137		0.189811
0.341137		0.189811
0.341289		0.191591
0.341289		0.191591
0.341289		0.191591
0.341289		0.191591
0.34433		0.191591
0.344894		0.191591
0.345786		0.191591
0.347056		0.191591
0.347341		0.191591
0.347728		0.192302
0.349264		0.192302
0.350356		0.192302
0.35194		0.192302
0.35205		0.192302
0.353467		0.192302
0.355045		0.192302
0.355045		0.192302
0.355236		0.192302
0.357334		0.192302
0.357956		0.192302
0.358592		0.1935
0.36262		0.1935
0.364867		0.1935
0.366384		0.1935
0.366384		0.1935
0.366691		0.1935
0.367878		0.1935
0.368107		0.1935
0.368107		0.1935
0.368536		0.1935
0.368644		0.1935
0.369377		0.1935
0.370039		0.1935
0.370039		0.1935
0.371984		0.1935
0.372353		0.1935
0.372353		0.1935
0.373273		0.1935
0.375651		0.1935
0.375651		0.194691
0.378432		0.195028
0.378939		0.195028
0.380432		0.195028
0.380517		0.195028
0.380517		0.195028
0.38292		0.195028
0.383311		0.195028
0.385404		0.195028
0.387		0.195028
0.387		0.195028
0.387629		0.195028
0.388289		0.195028
0.388583		0.195028
0.388583		0.195028
0.390056		0.195028
0.392294		0.195629
0.395611		0.195629
0.400176		0.195629
0.400176		0.195629
0.400956		0.195629
0.401918		0.195629
0.401948		0.196789
0.403984		0.196789
0.405141		0.196789
0.413478		0.196789
0.413595		0.198039
0.414054		0.198039
0.414183		0.198039
0.417138		0.198478
0.417138		0.198478
0.422456		0.198478
0.422622		0.198478
0.422824		0.198478
0.427571		0.199142
0.433164		0.199142
0.43794		0.199142
0.440034		0.199522
0.44747		0.199522
0.448951		0.199522
0.477394		0.199522
0.494737		0.199522
0.498747		0.199522
0.520016		0.199522
0.55485		0.199522
0.584072		0.199522
0.608492		0.199522
0.63593		0.199522
0.847497		0.201781
		0.201781
		0.201781
		0.201781
		0.201781
		0.202831
		0.203651
		0.203651
		0.203651
		0.203651
		0.203651
		0.203651
		0.203651
		0.203651
		0.203651
		0.203651
		0.203651
		0.203967
		0.203967
		0.203967
		0.203967
		0.203967
		0.203967
		0.203967
		0.203967
		0.205038
		0.205038
		0.205038
		0.20578
		0.20578
		0.20578
		0.20578
		0.20578
		0.206519
		0.206519
		0.206739
		0.206739
		0.206739
		0.206739
		0.206739
		0.206739
		0.206739
		0.206739
		0.206739
		0.206739
		0.206739
		0.206739
		0.207622
		0.207622
		0.207622
		0.210269
		0.210269
		0.21092
		0.21092
		0.21092
		0.21092
		0.21092
		0.21092
		0.21092
		0.21092
		0.21092
		0.21092
		0.211311
		0.211365
		0.211365
		0.211365
		0.211932
		0.211932
		0.211932
		0.211932
		0.211932
		0.211932
		0.211932
		0.211932
		0.211932
		0.211932
		0.211932
		0.212839
		0.212839
		0.212839
		0.212839
		0.212839
		0.213497
		0.215
		0.215
		0.215
		0.215
		0.215
		0.215
		0.21585
		0.21585
		0.21585
		0.21585
		0.21585
		0.21585
		0.21585
		0.216339
		0.216339
		0.216339
		0.216339
		0.216339
		0.216339
		0.216339
		0.216339
		0.216339
		0.216339
		0.216339
		0.216339
		0.216339
		0.216779
		0.216779
		0.216779
		0.216779
		0.217334
		0.217334
		0.217334
		0.217334
		0.217334
		0.217334
		0.217334
		0.217647
		0.217773
		0.217773
		0.217773
		0.217773
		0.217773
		0.220294
		0.220294
		0.220294
		0.220294
		0.220294
		0.220294
		0.221516
		0.221516
		0.221516
		0.221516
		0.221978
		0.221978
		0.221978
		0.221978
		0.221978
		0.221978
		0.221978
		0.223667
		0.223667
		0.223667
		0.223667
		0.223667
		0.22455
		0.22455
		0.22455
		0.225151
		0.225151
		0.225151
		0.225151
		0.226696
		0.226696
		0.226696
		0.226696
		0.226696
		0.22693
		0.22693
		0.22693
		0.22693
		0.22795
		0.22795
		0.228548
		0.228548
		0.228732
		0.228732
		0.228732
		0.230226
		0.230226
		0.230226
		0.231251
		0.232129
		0.232129
		0.232129
		0.232129
		0.232558
		0.232811
		0.233818
		0.233818
		0.233818
		0.233818
		0.23415
		0.23415
		0.23415
		0.23415
		0.23415
		0.23415
		0.23415
		0.235302
		0.235302
		0.235302
		0.235302
		0.235302
		0.235302
		0.235302
		0.235302
		0.235302
		0.2365
		0.2365
		0.2365
		0.2365
		0.237403
		0.237691
		0.237691
		0.237691
		0.238028
		0.238028
		0.238028
		0.238028
		0.238028
		0.238028
		0.238028
		0.238028
		0.238105
		0.238105
		0.238629
		0.240377
		0.240377
		0.240377
		0.240377
		0.240377
		0.240377
		0.240377
		0.240377
		0.240377
		0.241039
		0.241039
		0.241039
		0.24122
		0.24122
		0.24122
		0.24122
		0.242522
		0.242522
		0.242522
		0.242522
		0.243245
		0.243478
		0.243478
		0.243478
		0.244507
		0.244507
		0.244781
		0.244781
		0.244781
		0.245761
		0.245761
		0.245761
		0.245831
		0.245831
		0.245831
		0.245831
		0.246967
		0.248179
		0.248179
		0.248179
		0.250622
		0.250622
		0.250731
		0.25119
		0.25119
		0.25119
		0.252673
		0.252673
		0.253113
		0.25392
		0.25392
		0.25392
		0.25392
		0.254311
		0.25475
		0.25475
		0.25475
		0.25475
		0.25475
		0.255502
		0.255502
		0.255502
		0.255502
		0.255502
		0.255839
		0.2576
		0.258
		0.258
		0.258
		0.258
		0.258
		0.258
		0.258
		0.258
		0.259031
		0.259031
		0.259031
		0.259031
		0.259031
		0.259031
		0.259031
		0.259031
		0.259031
		0.259031
		0.259031
		0.259031
		0.259031
		0.259031
		0.259031
		0.259072
		0.259072
		0.259072
		0.259072
		0.25929
		0.259339
		0.25989
		0.25989
		0.262258
		0.262258
		0.262258
		0.262258
		0.262258
		0.262258
		0.262258
		0.262539
		0.263642
		0.263642
		0.263642
		0.264071
		0.264071
		0.264356
		0.264356
		0.264356
		0.264778
		0.264778
		0.264978
		0.265849
		0.265849
		0.266757
		0.266757
		0.266757
		0.266757
		0.267467
		0.267467
		0.268151
		0.269394
		0.269489
		0.269489
		0.269489
		0.27082
		0.271548
		0.272122
		0.272562
		0.272562
		0.272562
		0.272562
		0.272562
		0.272562
		0.272562
		0.273444
		0.27365
		0.27365
		0.274562
		0.274562
		0.274562
		0.274562
		0.274562
		0.275558
		0.275558
		0.275811
		0.275811
		0.275811
		0.275811
		0.276661
		0.276661
		0.276884
		0.276884
		0.276884
		0.276884
		0.278302
		0.278584
		0.278584
		0.2795
		0.2795
		0.2795
		0.2795
		0.2795
		0.279847
		0.279847
		0.280069
		0.280069
		0.280204
		0.280475
		0.280475
		0.280475
		0.280691
		0.281028
		0.281101
		0.282167
		0.283377
		0.283377
		0.283377
		0.28422
		0.28422
		0.28422
		0.28422
		0.28422
		0.285278
		0.285278
		0.285278
		0.285522
		0.286846
		0.288006
		0.288006
		0.288006
		0.288006
		0.288006
		0.288138
		0.288138
		0.288138
		0.288138
		0.288138
		0.288138
		0.288138
		0.288453
		0.288453
		0.288453
		0.288453
		0.288453
		0.288831
		0.289359
		0.289543
		0.289543
		0.289967
		0.289967
		0.291017
		0.292063
		0.292373
		0.293369
		0.293369
		0.293369
		0.293369
		0.293731
		0.293731
		0.293731
		0.294371
		0.294371
		0.294371
		0.294371
		0.294371
		0.294961
		0.297311
		0.29775
		0.29775
		0.29775
		0.298286
		0.300118
		0.301
		0.301
		0.301189
		0.301189
		0.301189
		0.301767
		0.301894
		0.301894
		0.301894
		0.301894
		0.301894
		0.302072
		0.302659
		0.302779
		0.304559
		0.305258
		0.305258
		0.305258
		0.305258
		0.305441
		0.305949
		0.307356
		0.307356
		0.307799
		0.307833
		0.307901
		0.30899
		0.309316
		0.311151
		0.311434
		0.311542
		0.312223
		0.312394
		0.312462
		0.312462
		0.312696
		0.313271
		0.314956
		0.315409
		0.315409
		0.315409
		0.316313
		0.317507
		0.317562
		0.318334
		0.318334
		0.318412
		0.318558
		0.318558
		0.318811
		0.318811
		0.319705
		0.320597
		0.320618
		0.320618
		0.321302
		0.3225
		0.3225
		0.3225
		0.3225
		0.3225
		0.3225
		0.323475
		0.323475
		0.323691
		0.323691
		0.324699
		0.327713
		0.327713
		0.328709
		0.328709
		0.328887
		0.329478
		0.329846
		0.330205
		0.331138
		0.331138
		0.331453
		0.332651
		0.332767
		0.333373
		0.335432
		0.335432
		0.336528
		0.336528
		0.336731
		0.337651
		0.341137
		0.341289
		0.341289
		0.341688
		0.341688
		0.342802
		0.344
		0.344767
		0.344894
		0.345786
		0.347559
		0.348441
		0.349264
		0.350064
		0.35194
		0.353077
		0.353243
		0.353259
		0.354151
		0.355936
		0.355936
		0.356045
		0.357334
		0.35771
		0.358592
		0.362578
		0.362621
		0.3655
		0.365545
		0.366216
		0.368644
		0.370478
		0.371485
		0.371887
		0.372353
		0.373856
		0.374138
		0.375651
		0.378432
		0.378432
		0.378939
		0.378939
		0.378939
		0.380517
		0.381408
		0.382997
		0.384604
		0.384604
		0.387
		0.387563
		0.387629
		0.387767
		0.390056
		0.390056
		0.391572
		0.393356
		0.393578
		0.393578
		0.394838
		0.395611
		0.399767
		0.401918
		0.407934
		0.410075
		0.411354
		0.413002
		0.417831
		0.422622
		0.424334
		0.446444
		0.451196
		0.469567
		0.471802
		0.520016
		0.520016
		0.6734
		0.685644
		0.687434
