# Supplementary material for: Functional membrane microdomains and the hydroxamate siderophore transporter ATPase FhuC govern Isd-dependent heme acquisition in Staphylococcus aureus
Source: eLife journal article supplement (doi:10.7554/elife.85304), 2023-04-12
Supplement: fig4-data1 [file Figure 4d-source data.xlsx]

## Sheet: normalized mean mNeongreen Inte
normalized mean mNeongreen Intensity	FloA-SNAP + IPTG	ΔfloA + IPTG	dfloA:floA + IPTG
replicate #1	0.9998	0.1411	1.20474
replicate #2	0.9999	0.1094	1.10226
replicate #3	1	0.07608	1.59334

## Sheet: normalized individual mNeongree
replicate #1	FloA-SNAP pcq11-IsdF-mNeon + IPTG	dFloA pcq11-IsdF-mNeon + IPTG	replicate #2	FloA-SNAP pcq11-IsdF-mNeon + IPTG	dFloA pcq11-IsdF-mNeon + IPTG	replicate #3	FloA-SNAP pcq11-IsdF-mNeon + IPTG	dFloA pcq11-IsdF-mNeon + IPTG
	0.313692	0.333814		1.02923	0.0914357		0.05797	0.025862
	0.133329	0.115883		0.284412	0.005339		0.463915	0.049164
	1.92707	0.114386		0.352143	0.22163		0.500468	0.072186
	0.804401	0.151127		0.394022	0.0542369		0.901068	0.050598
	0.440452	0.123147		1.01223	0.0363521		1.35746	0.058917
	0.403093	0.130133		0.719374	0.0484964		0.018013	0.036571
	0.45589	0.312558		0.427835	0.0413263		0.069365	0.059604
	1.06557	0.207788		0.591704	0.0557244		0.852923	0.039949
	0.59756	0.119258		2.15008	0.0354235		0.734829	0.053026
	0.470873	0.112759		1.72882	0.0480758		1.47937	0.089594
	1.2706	0.173524		1.28293	0.0501726		1.16187	0.078822
	0.310244	0.165687		0.998958	0.0543073		1.33217	0.101238
	0.290914	0.185048		0.850542	0.0745984		1.43479	0.081795
	0.271922	0.172779		0.626535	0.0802098		0.77071	0.072404
	0.447623	0.140473		0.580169	0.069736		1.09141	0.087964
	0.660198	0.151467		0.616269	0.0750727		1.30956	0.060206
	0.884517	0.137613		0.608187	0.0653959		1.51966	0.092684
	1.91965	0.163729		0.708132	0.0388376		1.31197	0.089697
	1.9639	0.145764		1.4559	0.0332825		1.33559	0.06233
	1.47056	0.177207		1.27512	0.0496985		1.26089	0.073751
	0.478243	0.156737		0.69326	0.0643373		1.31851	0.099807
	0.46113	0.177624		0.751375	0.06305		0.71325	0.079923
	0.459721	0.159647		1.07094	0.0474208		1.25527	0.093116
	0.422396	0.0937386		0.933737	0.0715784		1.29345	0.078609
	0.384274	0.0834318		1.19817	0.0953497		1.42802	0.079905
	0.579963	0.131493		1.18397	0.0721818		1.48517	0.065948
	0.498693	0.116006		1.01987	0.0902483		0.358541	0.051875
	0.646577	0.131306		0.864846	0.0875258		0.518415	0.073803
	0.823926	0.141818		0.987874	0.0605815		1.31584	0.071813
	0.583566	0.110419		0.952178	0.0779232		1.75452	0.088979
	0.689226	0.1254		1.37049	0.0978478		1.51753	0.060772
	0.509649	0.158546		1.23744	0.0998804		1.79185	0.058973
	0.648481	0.121449		1.15285	0.0871612		1.82714	0.086398
	0.684779	0.112533		1.2115	0.00905927		1.6466	0.074208
	2.83015	0.124531		0.840195	0.0146374		1.66601	0.075462
	3.11373	0.157455		1.0928	0.0856421		0.973424	0.055232
	0.750828	0.182345		0.00210756	0.0786114		1.04501	0.05364
	0.68527	0.130598		5.21678	0.0860824		0.570544	0.068617
	0.384875	0.142371		0.673236	0.0763841		0.644825	0.060069
	0.506808	0.137665		1.24965	0.0783924		0.770929	0.073833
	6.89091	0.163182		0.777878	0.0778254		0.597047	0.054191
	3.73475	0.163812		0.67626	0.0845322		0.784948	0.046847
	0.689935	0.204713		0.820416	0.0825216		1.00709	0.066934
	0.835982	0.126478		0.862093	0.0859059		0.681961	0.062125
	0.238409	0.0980802		0.69228	0.0928772		1.31726	0.034619
	0.834629	0.110386		1.11077	0.0787337		1.40694	0.030733
	1.20546	0.116998		0.869325	0.0774553		0.628922	0.042301
	0.538742	0.0937378		0.88499	0.0838132		0.552521	0.054101
	0.651053	0.102683		1.10246	0.104648		1.14493	0.09769
	0.308061	0.156266		1.19924	0.10965		1.04432	0.000992
	0.391846	0.122137		1.59197	0.110753		1.17037	0.082057
	0.572313	0.128043		0.583587	0.123034		1.40155	0.069805
	0.838468	0.122641		1.00674	0.161117		1.11223	0.043782
	0.735398	0.110303		0.924315	0.120218		1.38456	0.071629
	1.07668	0.120315		1.01549	0.132979		1.64498	0.059349
	1.45805	0.0849544		0.430306	0.145531		1.32239	0.07058
	1.19246	0.101452		0.495951	0.113095		1.6383	0.063742
	1.35452	0.100823		0.403369	0.157478		1.80966	0.052264
	0.365285	0.111101		0.321248	0.103827		0.984307	0.06865
	0.349851	0.0640196		0.35354	0.115315		1.46065	0.041094
	0.390281	0.0864162		0.841346	0.123718		1.23666	0.0306
	1.17762	0.106655		1.10044	0.114745		1.01824	0.043588
	1.10864	0.0945131		1.16797	0.106427		0.837937	0.045494
	0.684541	0.193158		1.09955	0.108489		0.870455	0.05509
	0.835753	0.1439		0.95593	0.112607		0.911914	0.045442
	0.389206	0.114421		1.04197	0.0924393		0.777042	0.036151
	0.582401	0.162791		1.04574	0.120316		0.797053	0.033932
	0.337415	0.144619		1.4077	0.091382		0.754748	0.04626
	0.37241	0.129793		0.939384	0.116654		0.975544	0.061885
	0.0328329	0.172586		0.981917	0.104837		0.855619	0.044207
	1.01744	0.118432		0.670833	0.121841		0.80582	0.051604
	1.15625	0.131242		0.567888	0.107164		0.817055	0.074238
	0.902562	0.165196		0.0221475	0.10794		0.911775	0.084957
	0.820338	0.159425		0.604439	0.127033		0.801985	0.084427
	1.13825	0.167267		0.634115	0.119172		1.12669	0.067783
	0.202467	0.143687		2.08438	0.135494		1.19267	0.100143
	0.731696	0.146485		2.73789	0.0985843		0.781343	0.107688
	0.820738	0.144302		0.625071	0.112637		1.3175	0.098478
	0.658267	0.159571		0.376024	0.0851883		1.16814	0.096126
	0.924882	0.158112		0.0535224	0.086258		0.876064	0.105545
	1.10538	0.169836		0.114273	0.0952363		0.759775	0.096871
	0.790041	0.151822		0.0330337	0.107185		0.987562	0.052354
	0.596436	0.160065		0.897129	0.104708		0.56613	0.043387
	0.679677	0.161305		0.823524	0.100661		0.665293	0.069666
	0.614875	0.14938		0.425539	0.120662		1.27913	0.046947
	0.598313	0.174737		0.443953	0.122114		1.26644	0.051269
	1.07013	0.1472		0.324425	0.10614		0.461166	0.087815
	1.53514	0.155322		0.637405	0.123856		0.475645	0.122023
	0.438078	0.113772		0.706714	0.126005		0.058017	0.124183
	0.598277	0.126666		0.353178	0.110611		0.820937	0.079719
	0.830415	0.125286		0.408024	0.107187		0.92986	0.066165
	0.693875	0.158012		0.750547	0.0949754		0.883724	0.077013
	0.866943	0.158083		0.575065	0.108369		0.500852	0.045345
	0.131435	0.147902		0.475897	0.10622		0.425197	0.062286
	0.765976	0.175354		1.3213	0.156086		0.974231	0.056805
	0.873189	0.181873		1.07629	0.125317		1.32907	0.050372
	0.379925	0.130149		1.31394	0.139717		1.03633	0.050957
	0.446475	0.114032		1.22457	0.103607		0.666048	0.055512
	1.70065	0.158864		1.32291	0.118253		0.741537	0.06597
	1.78644	0.14084		1.1095	0.123025		0.642743	0.057009
	1.25499	0.139783		1.38151	0.133161		0.698523	0.057564
	1.71811	0.109356		1.29275	0.147299		0.568917	0.048617
	0.701249	0.175003		1.07675	0.137251		0.7147	0.070674
	0.708207	0.125484		1.52427	0.147357		0.740653	0.062257
	0.725166	0.139741		1.1039	0.145193		0.734482	0.085754
	1.01582	0.0764786		1.3135	0.119518		0.582138	0.08086
	0.789808	0.0593794		1.15454	0.122508		0.057399	0.073828
	0.721625	0.0710332		1.65723	0.123743		1.05531	0.058109
	0.638908	0.104071		1.28039	0.101148		0.97792	0.071292
	0.936253	0.0861571		1.08307	0.108507		1.10315	0.109899
	0.921785	0.111614		1.42202	0.0963241		0.807591	0.04853
	0.818517	0.120316		0.976672	0.107271		0.635505	0.034824
	0.538614	0.123409		0.581046	0.131149		0.867985	0.063917
	0.492609	0.10346		0.431388	0.130365		0.674407	0.087315
	0.640955	0.156451		0.536416	0.118548		0.947901	0.068584
	0.733266	0.149299		0.590144	0.13724		0.914638	0.04553
	0.502277	0.174107		0.45757	0.130439		1.06748	0.08091
	0.430866	0.151359		0.615179	0.146571		1.16072	0.093341
	0.905667	0.111853		0.558201	0.155999		1.08756	0.090535
	0.955527	0.108798		0.235701	0.0688853		0.839455	0.070731
	0.536075	0.17728		0.793975	0.0793265		0.856279	0.063207
	0.533511	0.183382		1.61737	0.113957		1.15236	0.058634
	0.849599	0.136722		0.222492	0.124291		1.33448	0.052169
	0.960214	0.19494		0.506094	0.10613		0.913532	0.062848
	0.46319	0.122214		0.582612	0.124509		0.976919	0.014508
	1.73211	0.110327		0.768934	0.150055		1.17609	0.002858
	1.40488	0.0875971		0.879811	0.116923		1.23985	0.048785
	0.389412	0.102573		0.644296	0.129483		1.15803	0.00943
	0.599396	0.117702		1.16606	0.149342		1.06047	0.007715
	0.521933	0.0979195		0.733194	0.106989		1.16127	0.071803
	0.184889	0.0737855		1.03696	0.108035		0.846606	0.088827
	1.5611	0.117953		1.38235	0.128966		1.39858	0.061297
	0.912026	0.0937062		0.303992	0.10554		1.15555	0.040867
	0.590079	0.0285054		0.600865	0.126076		1.07459	0.049875
	0.375847	0.0730835		0.623118	0.15067		1.44875	0.075327
	1.146	0.0300216		0.795845	0.147359		0.978213	0.043834
	1.16001	0.00649998		1.53542	0.126197		0.842044	0.062511
	1.13666	0.131032		1.5591	0.145096		1.3778	0.051802
	0.940346	0.168289		0.923677	0.131873		1.51685	0.065245
	0.918021	0.185786		0.68488	0.13414		0.771731	0.047169
	0.896418	0.17911		0.762793	0.15757		0.799096	0.082673
	1.00849	0.193322		2.58683	0.151983		0.967195	0.093384
	1.00871	0.165024		0.757919	0.156511		0.845753	0.06474
	1.12547	0.158941		1.08116	0.120217		0.956374	0.08786
	0.701969	0.186335		1.43238	0.0937348		0.968528	0.065675
	1.74531	0.186391		1.26581	0.106275		0.230833	0.062462
	1.84635	0.160621		0.71763	0.0982613		0.372903	0.069393
	1.14457	0.164397		0.789539	0.09522		0.09778	0.047996
	1.44635	0.148576		0.709449	0.0857677		0.141418	0.085429
	1.458	0.167747		0.495426	0.124321		1.05409	0.064428
	1.38164	0.15628		2.03984	0.128035		1.59984	0.077543
	1.43499	0.10358		1.54481	0.117204		1.33798	0.091429
	0.830979	0.112414		0.643397	0.112854		1.46881	0.060868
	0.680435	0.157161		1.04658	0.122085		1.26075	0.045715
	0.951201	0.143383		0.79149	0.115957		1.08781	0.065117
	0.863032	0.132269		0.893995	0.120671		0.948411	0.069238
	1.12899	0.145108		1.74449	0.124232		1.93544	0.084922
	1.05194	0.209646		1.15889	0.134681		2.0502	0.101973
	1.55747	0.234991		0.891387	0.127738		0.057911	0.114217
	2.29127	0.113813		0.968897	0.133149		1.33921	0.100701
	1.99444	0.191867		0.689305	0.11936		0.951781	0.046717
	0.834783	0.175831		0.703067	0.128147		1.1236	0.035521
	0.736966	0.214054		0.645522	0.129465		1.10355	0.049048
	2.59214	0.183392		0.569862	0.115783		0.886896	0.049648
	0.879009	0.201176		0.00211539	0.0950122		0.890016	0.069762
	0.852801	0.153053		0.721214	0.101592		1.02818	0.086728
	0.889258	0.182836		0.961704	0.11238		0.078219	0.070515
	0.913782	0.191526		3.9856	0.110111		1.43358	0.078411
	0.490266	0.177175		2.50624	0.149076		1.67471	0.081639
	0.573985	0.176603		1.4799	0.142527		1.60353	0.066868
	0.393369	0.176514		0.905885	0.156415		1.8383	0.072872
	0.84429	0.151932		0.755031	0.123588		1.2518	0.072046
	0.830904	0.135439		1.03602	0.155869		1.65156	0.062472
	1.12585	0.104294		0.911567	0.136547		1.77879	0.054707
	1.02977	0.139841		0.704191	0.117778		0.033896	0.113186
	1.5818			1.03496	0.129068		2.99379	0.117928
	1.86522			0.829725	0.071345		1.52743	0.089296
	2.15904			0.83342	0.08641		1.50558	0.14997
	2.3601			0.793677	0.104315		1.73868	0.111193
	1.17227			0.717896	0.13385		1.13691	0.099492
	0.909825			1.02724	0.110861		0.893967	0.039531
	1.02819			0.55198	0.129274		1.02176	0.039665
	0.954393			0.501689	0.126821		0.610152	0.040774
	0.757549			1.62362	0.135483		0.700114	0.044642
	0.839562			1.17543	0.119509		0.568195	0.051082
	0.538384			0.528059	0.0909178		0.826129	0.01464
	0.638141			0.790751	0.0994785		0.827834	0.021799
	1.24717			0.939479	0.124149		0.275848	0.056019
	0.43684			0.48595	0.0990277		0.375304	0.02068
	0.878537			1.37496	0.125595		1.03299	0.067751
	0.944679			0.872581	0.12759		1.12114	0.066096
	0.889362			1.43776	0.112162		0.478685	0.089252
	0.83546			0.863798	0.123876		0.56077	0.043279
	1.61452			1.48584	0.133844		1.24174	0.065807
	1.13974			1.02874	0.14074		1.62776	0.060215
	1.16381			2.7101	0.114843		1.28504	0.050746
	1.06565			2.48033	0.113048		1.25959	0.076123
	1.85216			0.156421	0.0189126		0.789701	0.072904
	0.788509			1.32801	0.184587		1.36073	0.059075
	1.00805			0.0805214	0.175979		0.922307	0.048793
	1.10352			0.682684	0.118944		1.10906	0.042952
	1.1204			0.773884	0.121355		1.6847	0.059687
	1.36866			1.98712	0.113194		0.799684	0.062927
	1.33103			1.36521	0.115743		0.867157	0.044649
	1.16578			0.642244	0.102255		0.785604	0.044737
	1.1659			2.21866	0.0995605		0.926271	0.07924
	1.06064			2.82375	0.0952814		1.45173	0.061765
	1.21401			0.98874	0.0957913		1.08445	0.076633
	1.14955			1.01391	0.0853258		1.02497	0.081804
	1.19947			0.93899	0.136391		0.988957	0.059215
	1.24231			0.881654	0.117665		0.998325	0.085193
	2.1317			2.98894	0.11452		0.450329	0.068367
	2.49334			2.24521	0.126143		0.447823	0.044797
	0.941404			2.753	0.108116		0.49028	0.102841
	1.10341			4.4093	0.128501		1.02491	0.107354
	1.0862			2.84999	0.124946		1.15336	0.098361
	0.977113			2.34716	0.129629		0.915028	0.074156
	0.878674			1.82477	0.123877		1.01415	0.085711
	1.48747			2.08656	0.119756		1.96968	0.106267
	1.387			2.15934	0.0926769		1.2445	0.107717
	2.0771			1.65647	0.103944		1.42087	0.099131
	1.31117			1.35328	0.023594		1.38557	0.079843
	1.01319			0.968915	0.0914312		1.17864	0.100059
	0.918494			4.87005	0.0914471		1.16862	0.122612
	1.15175			0.655022	0.0890231		1.00117	0.113368
	0.463412			0.897855	0.103928		1.57394	0.088332
	0.70028			0.672382	0.123063		1.42043	0.072982
	0.958684			0.674692	0.142476		2.89914	0.106939
	1.37389			2.14483	0.122396		2.08093	0.093281
	1.43682			2.97424	0.138463		1.71359	0.098044
	1.18715			3.09363	0.0174531		2.0292	0.098227
	0.951921			3.79754	0.111647		3.0642	0.093596
	0.972716			2.34932	0.122365		3.87556	0.101319
	0.495844			1.76062	0.112616		0.975598	0.096966
	0.64638			1.86118	0.122205		1.10003	0.008192
	0.744079			1.29948	0.11963		1.3691	0.118268
	0.910017			0.877897	0.133276		1.34931	0.082933
	1.13438			0.669576	0.0954634		1.27247	0.123387
	0.87259			0.732282	0.0815716		1.99079	0.116633
	0.896016			1.4055	0.0113428		2.10387	0.12813
	0.506269			0.884675	0.108148		1.46328	0.010774
	0.650906			0.566786	0.116628		1.38923	0.110152
	0.590365			1.39273	0.160884		1.18548	0.073187
	0.730612			2.42154	0.146169		1.22702	0.080672
	1.04049			1.40908	0.148923		1.92448	0.092983
	0.88399			1.09449	0.0992789		2.11776	0.096485
	1.45012			1.44765	0.122334		1.72318	0.095824
	1.32577			0.607547	0.103169		1.66118	0.095451
	0.874866			0.665581	0.084005		0.755709	0.112937
	0.834477			0.898269	0.0662381		0.944612	0.103907
	0.886504			1.00436	0.0722893		0.812299	0.126061
	2.58125			0.856884	0.110016		0.423187	0.089382
	2.15095			3.25139	0.105528		0.536546	0.122911
	1.70943			3.21977	0.0812236		1.23249	0.101358
	0.916394			3.75505	0.0807177		1.26763	0.0989
	0.9983			1.88774	0.0999942		0.774962	0.085354
	0.500935			3.71038	0.0855949		0.760323	0.116252
	0.598464			3.0768	0.09736		1.21757	0.103428
	1.29899			1.02127	0.0767682		0.958627	0.093334
	1.05096			1.25469	0.0848601		1.34116	0.078804
	1.05656			1.10179	0.104938		1.76245	0.121327
	1.31139			0.430079	0.122281		0.954481	0.146909
	1.12478			0.376343	0.140639		1.27187	0.130386
	1.33783			0.401445	0.122217		1.43674	0.128681
	1.32614			0.356711	0.131469		1.12006	0.123907
	1.25579			0.0705217	0.123182		1.03963	0.101595
	1.11235			1.47333	0.0904		0.544156	0.117966
	1.35622			1.16727	0.169133		1.43059	0.109546
	0.960242			0.791467	0.124908		0.673816	0.133245
	1.08513			0.688943	0.15059		0.983079	0.121354
	1.25687			0.618359	0.145439		0.759433	0.161393
	0.586442			0.78377	0.0958253		0.981055	0.130321
	0.487171			0.754843	0.115226		1.22743	0.083792
	0.8998			0.278151	0.105514		1.26811	0.089877
	0.884636			0.91743	0.0967559		0.613711	0.127803
	1.70506			0.891365	0.110343		0.855626	0.113899
	1.92637			0.594784	0.122754		1.03457	0.148722
	1.908			0.426349	0.09985		1.36211	0.12835
	2.2746			0.648392	0.108756		0.085683	0.055527
	2.95107			0.681775	0.141378		0.267769	0.078207
	0.46389			0.849005	0.135674		0.116196	0.083002
	0.793267			0.847411	0.129762		1.2208	0.103661
	1.30162			0.760015	0.133384		1.06747	0.123632
	1.13222			0.86828	0.152738		0.669008	0.085187
	0.930947			1.10428	0.137519		1.11197	0.142764
	0.684475			0.140718	0.117194		1.71697	0.140468
	1.11994			0.64859	0.142204		1.38338	0.114641
	0.746965			0.624028	0.155617		1.40056	0.096828
	0.808232			1.15863	0.14652		1.60508	0.124695
	0.956128			0.857398	0.137171		1.13949	0.128383
	0.968281			0.618251	0.136602		1.38695	0.107194
	0.693738			0.848697	0.12835		1.10355	0.110549
	0.666845			0.697673			1.25435	0.114773
	0.399979			0.767754			0.70569	0.114464
	0.977718			0.678463			0.6169
	1.05015			0.986858			1.09444
	0.988487			0.409399			0.970708
	1.83967			0.342467			1.10767
	0.455408			0.768045			2.26291
	0.60652			0.633839			1.5135
	0.89792			0.297794			1.77842
	0.677601			0.227882			2.2657
				1.63792			2.03093
				0.630596			1.77443
				0.732868			0.465977
				0.936778			0.568423
				1.35569			0.771286
				1.93292			1.30255
				0.719414			1.35588
				1.80816			1.1262
				1.57333			0.791339
				1.78793			1.01091
				1.24609			1.18498
				1.66959			1.14247
				1.48988			1.33125
				1.48556			1.18642
				1.52144			1.38942
				1.10218			1.14576
				1.20469			1.18935
				1.00965			1.45358
				1.10731			1.01213
				0.0486183			1.14636
				0.667395			0.884677
				1.50954			0.036929
				1.10542			1.36468
				0.110549			1.23615
				0.405674			1.10022
				0.623309			0.98649
				0.816766			0.797866
				0.860804			0.753958
				0.842178			0.692033
				1.64117			0.914492
				2.16288			0.664707
				0.469704			1.17055
				0.674942			1.19522
				0.12492			2.25429
				0.498507			3.40281
				0.819192			1.07742
				1.08357			1.32435
				1.26317			1.29974
				0.591649			0.785523
				0.451016			1.14378
				0.934737			0.451609
				0.893107			0.659362
				0.473095			1.08732
				0.354536			0.060275
				1.53047			0.788875
				0.74624			0.968077
				0.866308			1.0712
				1.0551			1.09467
				1.53216			1.20698
				0.786753			0.819809
				0.76426			1.10181
				0.946063			0.804988
				0.495285			0.910942
				0.47226			0.856358
				0.532344			0.638355
				0.790111			0.01987
				1.05056			0.014527
				0.963819			0.013573
				0.857237			0.009095
				0.615821			1.02749
				0.606703			0.869101
				0.507366			0.887585
				0.583795			0.999634
				0.787794			0.536142
				0.56538			0.853903
				0.0297641			0.88729
				0.652316			0.957482
				0.662973			0.795258
				0.800546			0.874713
				0.058962			0.923579
				0.0424144			0.880058
				0.55798			0.625563
				0.194614			1.05641
				1.50829			0.693387
				1.11029			0.711087
				0.755261			0.667113
				1.10764			0.670513
				1.64649			1.31811
				1.46551			1.03475
				0.647735			0.801807
				0.479965			0.801187
				0.592199			1.02115
				0.455545			0.646448
				1.07164			0.606638
				1.11876			0.551321
				1.11115			0.546147
				1.15618			0.493467
				1.058			0.537744
				1.16894			0.545101
				1.31005			0.507071
				1.52521			0.708392
				1.36458			0.574246
				1.25748			0.514994
				1.26059			0.658674
				0.60337			0.482234
				0.64605			0.472981
				0.642641			0.587949
				0.842923			0.589657
				0.70781			0.898585
				0.955287			0.583835
				0.896946			0.974727
				0.750528			0.817194
				0.829094			1.32028
				0.7048			1.10372
				0.758843			2.81041
				0.735609			0.467091
				0.71148			0.345199
				1.08125			0.901131
				1.13718			0.82078
				0.465375			0.45318
				0.465193			0.469459
				0.445264			0.968346
				0.388407			0.887201
				0.35719			1.00335
				0.465915			0.647997
				0.598049			1.08225
				0.544757			1.32756
				0.554904			1.16202
				1.18548			1.24737
				0.863307			1.13549
				0.936824			0.568235
				1.64262			0.601781
				0.925982			0.65562
				0.860331			0.669528
				1.40458			0.577125
				1.60355			0.582174
				1.41171			0.754365
				0.0221222			1.05177
				0.412785			0.685932
				0.470884			0.546705
				0.0235186			0.738906
				0.941933			0.776242
				0.403708			0.748462
				0.571169			0.521854
				0.0154643			0.518898
				1.64378			0.141756
				0.696191			0.125014
				0.792913			0.164359
				0.776627			1.05366
				0.722908			1.40298
				2.02726			1.16006
				0.720801			1.41215
				1.38733			1.10711
				0.719965			1.2553
				1.11822			0.904886
				0.845768			0.821905
				0.562671			1.0202
				0.393561			0.871254
				0.854381			1.03028
				0.860639			1.34633
				1.01655			1.07456
				0.297206			1.28747
				0.219345			0.673726
				0.459926			1.85099
				0.381917			1.27947
				0.393094			1.45883
				0.438549			0.067713
				0.677557			0.028173
				0.438939			1.03191
				0.438878			0.820729
				0.563414			1.17015
				0.452106			1.26196
				0.20135			1.4492
				0.205579			1.65562
				0.363518			0.878019
				0.274244			1.02946
				0.028137			1.47566
				2.31551			1.49991
				2.39859			1.41278
				1.38991			1.99002
				1.36389			0.753087
				1.95694			1.08072
				1.6593			0.468425
				1.72449			0.574874
				1.34461			0.545273
				1.14905			0.464148
				0.984617			0.964106
				0.729473			1.28681
				0.660208			1.04074
				0.939514			1.47386
				1.30958			1.16379
				0.435783			1.02698
				0.618459			0.926568
				0.651499			1.11062
				0.368489			0.966541
				0.416586			0.55945
				0.988198			0.977647
				0.945806			0.856535
				1.14931			1.11519
				0.779812			1.44866
				0.618927			1.18627
				0.517185			1.27271
				1.4119			0.861522
				1.3889			0.699524
				0.953689			1.01529
				1.20609			1.05544
				0.950469			1.3087
				1.18531			0.842217
				0.920438			1.05902
				1.51694			0.868269
				1.1734			1.89071
				1.01556			1.58026
				0.941282			2.09652
				0.837049			1.57272
				0.802087			1.66848
				0.875285			1.27584
				0.740091			0.847324
				0.60354			0.802139
				0.956176			1.04291
				1.02904			1.0621
				1.00021			0.869907
				0.868948			0.838161
				0.896674			0.877452
							1.23024
							1.22259
							1.3375
							1.48889
							0.737186
							0.798515
							0.467395
							0.437969
							1.03598
							0.927998
							0.756376
							0.63909
							0.880037
							0.598534
							1.03174
							1.35381
							0.878814
							0.988307
							0.687918
							1.00833
							1.20407
							1.40623
							0.995673
							1.01753
							0.819089
							0.416113
							0.577183
							0.839614
							0.814704
							1.06173
							1.31652
							0.750086
							0.692961
							1.19378
							1.20058
							1.21352
							1.01276
							0.785394
							0.922225
							1.3433
							0.897654
							1.02568
							0.017498
							0.498117
							0.518406
							1.13385
							0.886568
							0.916972
							0.79767
							0.854566
							0.671079
							0.841647
							0.628892
							0.925428
							1.047
							0.881968
							1.02183
							0.846506
							0.602237
							0.988844
							1.07531
							1.07981
							0.787578
							0.636714
							0.936052
							0.721853
							0.57632
							0.675652
							0.792173
							0.670798
							0.681159
							1.13108
							1.35355
							0.465017
							0.369887
							0.93103
							0.97935
							1.07734
							1.17942
							0.078946
							0.832182
							0.810309
							0.696446
							0.905036
							0.85022
							0.787645
							1.00309
							0.949495
							0.48447
							0.458964
							0.507873
							0.647761
							0.600906
							1.26104
							0.956926
							1.26063
							1.24931
							0.86394
							0.960766
							1.2647
							0.824448
							0.882255
							0.882978
							1.07082
							1.09007
							1.0875
							0.937613
							0.779446
							0.974038
							0.174414
							0.312429
							0.150138
							0.227973
							0.903629
							0.790933
							1.16175
							1.08052
							1.31552
							0.959296

## Sheet: raw individual mNeongreen inten
replicate #1	FloA-SNAP pcq11-IsdF-mNeon + IPTG	dFloA pcq11-IsdF-mNeon + IPTG	replicate #2	FloA-SNAP pcq11-IsdF-mNeon + IPTG	dFloA pcq11-IsdF-mNeon + IPTG	replicate #3	FloA-SNAP pcq11-IsdF-mNeon + IPTG	dFloA pcq11-IsdF-mNeon + IPTG
	51.2259	54.5119		497.323	44.1817		6.1216	2.73104
	21.7726	18.9236		137.428	2.5798		48.9894	5.1917
	314.69	18.6792		170.156	107.091		52.8494	7.62289
	131.359	24.679		190.391	26.2073		95.1528	5.34316
	71.9259	20.1098		489.108	17.5653		143.348	6.22163
	65.8251	21.2507		347.601	23.4334		1.90215	3.8619
	74.4468	51.0408		206.73	19.9689		7.32494	6.29419
	174.007	33.9317		285.911	26.926		90.0687	4.21861
	97.5816	19.4748		1038.92	17.1166		77.598	5.59955
	76.8935	18.4136		835.366	23.2302		156.221	9.46112
	207.489	28.3365		619.909	24.2434		122.693	8.32356
	50.6628	27.0567		482.696	26.2413		140.677	10.6907
	47.5063	30.2184		410.982	36.046		151.514	8.63754
	44.4049	28.2149		302.741	38.7574		81.387	7.64583
	73.0969	22.9392		280.337	33.6964		115.253	9.28905
	107.81	24.7346		297.781	36.2751		138.289	6.35777
	144.442	22.4722		293.876	31.5993		160.476	9.78748
	313.479	26.7369		342.169	18.7663		138.544	9.47202
	320.705	23.8033		703.489	16.0821		141.039	6.58209
	240.142	28.9379		616.14	24.0143		133.15	7.78811
	78.097	25.5952		334.983	31.0878		139.234	10.5396
	75.3025	29.0059		363.064	30.4658		75.3192	8.43986
	75.0724	26.0703		517.479	22.9137		132.556	9.83308
	68.9772	15.3075		451.182	34.5867		136.588	8.3011
	62.752	13.6244		578.955	46.073		150.799	8.43798
	94.7079	21.4728		572.092	34.8783		156.833	6.96414
	81.4365	18.9437		492.801	43.608		37.8619	5.47797
	105.586	21.4423		417.894	42.2925		54.7447	7.79364
	134.547	23.1588		477.341	29.273		138.953	7.58342
	95.2963	18.0314		460.092	37.6525		185.278	9.39621
	112.551	20.4778		662.222	47.2801		160.251	6.41751
	83.2257	25.8905		597.93	48.2622		189.22	6.22759
	105.897	19.8326		557.057	42.1163		192.946	9.12359
	111.824	18.3766		585.396	4.37744		173.881	7.83634
	462.164	20.336		405.982	7.07282		175.931	7.9688
	508.473	25.7125		528.039	41.3823		102.794	5.8325
	122.61	29.7769		1.01837	37.985		110.353	5.66434
	111.905	21.3266		2520.75	41.595		60.2494	7.24593
	62.8501	23.2491		325.308	36.9088		68.0935	6.34325
	82.7617	22.4807		603.833	37.8792		81.41	7.79679
	1125.29	26.6477		375.871	37.6052		63.0482	5.7226
	609.884	26.7506		326.769	40.846		82.8905	4.94704
	112.666	33.4297		396.425	39.8745		106.348	7.06828
	136.516	20.6538		416.564	41.5097		72.0151	6.56039
	38.9322	16.0165		334.51	44.8783		139.103	3.65581
	136.295	18.026		536.725	38.0441		148.573	3.24544
	196.852	19.1057		420.058	37.4264		66.4142	4.46697
	87.9766	15.3074		427.627	40.4985		58.3463	5.71307
	106.317	16.7682		532.707	50.5658		120.904	10.3161
	50.3064	25.5182		579.472	52.9828		110.281	0.104782
	63.9884	19.9449		769.238	53.5159		123.591	8.66518
	93.4587	20.9094		281.989	59.45		148.004	7.37144
	136.922	20.0272		486.459	77.8516		117.451	4.62339
	120.091	18.0125		446.629	58.0891		146.21	7.56403
	175.822	19.6475		490.685	64.2554		173.71	6.26727
	238.1	13.873		207.924	70.3207		139.644	7.45323
	194.728	16.5672		239.643	54.6476		173.004	6.73114
	221.194	16.4644		194.908	76.0933		191.1	5.51907
	59.6511	18.1427		155.227	50.1694		103.943	7.24941
	57.1307	10.4544		170.83	55.7202		154.245	4.33955
	63.7329	14.1118		406.538	59.7807		130.591	3.23132
	192.305	17.4168		531.731	55.4449		107.527	4.60291
	181.04	15.434		564.364	51.4257		88.4861	4.80418
	111.786	31.5427		531.303	52.4218		91.92	5.81755
	136.478	23.4989		461.905	54.4117		96.2982	4.79871
	63.5574	18.685		503.482	44.6667		82.0556	3.81755
	95.1061	26.5837		505.304	58.1367		84.1688	3.58326
	55.0998	23.6163		680.198	44.1558		79.7014	4.88506
	60.8146	21.1953		453.91	56.3672		103.017	6.53503
	5.36162	28.1833		474.462	50.657		90.3534	4.66821
	166.147	19.3399		324.146	58.8735		85.0946	5.44943
	188.815	21.4317		274.404	51.7817		86.281	7.83957
	147.388	26.9765		10.7017	52.1565		96.2835	8.97144
	133.961	26.0341		292.065	61.3824		84.6897	8.91547
	185.876	27.3147		306.404	57.5841		118.978	7.15793
	33.0629	23.4641		1007.17	65.4709		125.946	10.5751
	119.486	23.921		1322.95	47.6359		82.5098	11.3719
	134.026	23.5645		302.034	54.4262		139.127	10.3992
	107.495	26.0579		181.695	41.163		123.355	10.1509
	151.033	25.8196		25.862	41.6799		92.5124	11.1456
	180.508	27.7341		55.2169	46.0182		80.2323	10.2296
	129.014	24.7925		15.9619	51.7918		104.287	5.52863
	97.398	26.1386		433.493	50.5948		59.7833	4.58162
	110.991	26.3411		397.927	48.6396		70.255	7.35678
	100.409	24.3937		205.621	58.3038		135.077	4.95761
	97.7045	28.5346		214.518	59.0056		133.736	5.41403
	174.751	24.0377		156.762	51.2867		48.6991	9.2733
	250.688	25.3641		307.994	59.8472		50.2281	12.8857
	71.5382	18.5789		341.484	60.8855		6.12656	13.1137
	97.6986	20.6846		170.656	53.4474		86.691	8.41835
	135.607	20.4592		197.157	51.7928		98.1932	6.98708
	113.31	25.8033		362.664	45.8921		93.3213	8.13257
	141.572	25.8149		277.871	52.364		52.8899	4.78844
	21.4633	24.1523		229.953	51.3255		44.9008	6.57739
	125.084	28.6352		638.453	75.4207		102.879	5.99866
	142.592	29.6999		520.063	60.5533		140.35	5.31928
	62.0418	21.2533		634.897	67.5111		109.437	5.38104
	72.9093	18.6214		591.712	50.0628		70.3346	5.8621
	277.716	25.9426		639.231	57.14		78.3063	6.96648
	291.725	22.9993		536.111	59.4459		67.8737	6.02012
	204.939	22.8265		667.547	64.3436		73.764	6.07877
	280.568	17.8578		624.658	71.175		60.0777	5.13391
	114.514	28.578		520.287	66.3198		75.4723	7.46323
	115.65	20.4916		736.525	71.2029		78.213	6.57433
	118.42	22.8196		533.405	70.1571		77.5613	9.05565
	165.883	12.489		634.681	57.7509		61.4738	8.53879
	128.976	9.69665		557.875	59.1957		6.06136	7.79622
	117.841	11.5997		800.773	59.7928		111.441	6.13629
	104.334	16.9948		618.686	48.8745		103.268	7.52847
	152.89	14.0695		523.34	52.4304		116.492	11.6053
	150.528	18.2265		687.121	46.5438		85.2816	5.12479
	133.664	19.6477		471.928	51.8335		67.1093	3.67739
	87.9557	20.1527		280.762	63.371		91.6592	6.74963
	80.4431	16.8951		208.447	62.9922		71.2174	9.22049
	104.668	25.5485		259.196	57.2826		100.098	7.24246
	119.742	24.3805		285.158	66.3145		96.5858	4.80798
	82.0219	28.4316		221.098	63.0281		112.726	8.54413
	70.3603	24.7169		297.255	70.823		122.572	9.85686
	147.895	18.2655		269.723	75.3787		114.847	9.5605
	156.037	17.7667		113.891	33.2854		88.6464	7.46915
	87.541	28.9499		383.649	38.3306		90.4231	6.6747
	87.1224	29.9462		781.515	55.0641		121.69	6.19174
	138.74	22.3267		107.508	60.0576		140.921	5.50906
	156.803	31.8336		244.544	51.282		96.469	6.63673
	75.6389	19.9576		281.518	60.163		103.163	1.53201
	282.853	18.0164		371.549	72.5066		124.195	0.301811
	229.417	14.3046		425.125	56.4974		130.928	5.15175
	63.5909	16.7502		311.324	62.5661		122.287	0.995804
	97.8814	19.2208		563.438	72.1619		111.985	0.814743
	85.2317	15.9902		354.279	51.6971		122.63	7.58243
	30.1924	12.0492		501.057	52.2024		89.4016	9.3801
	254.928	19.2618		667.95	62.3162		147.69	6.47292
	148.934	15.3022		146.889	50.9967		122.027	4.31555
	96.3598	4.65494		290.338	60.92		113.477	5.26678
	61.3759	11.9345		301.09	72.8038		152.988	7.95454
	187.142	4.90253		384.552	71.204		103.299	4.62889
	189.43	1.06145		741.914	60.9784		88.9199	6.60117
	185.617	21.3976		753.359	70.1103		145.495	5.47032
	153.558	27.4816		446.321	63.7211		160.18	6.88991
	149.913	30.3389		330.934	64.8164		81.4948	4.98109
	146.385	29.2487		368.581	76.1378		84.3845	8.73028
	164.687	31.5695		1249.96	73.438		102.136	9.86134
	164.722	26.9484		366.226	75.6263		89.3116	6.83658
	183.789	25.955		522.418	58.0889		100.993	9.27801
	114.632	30.4285		692.125	45.2927		102.277	6.93526
	285.01	30.4376		611.641	51.3522		24.376	6.59595
	301.509	26.2294		346.759	47.4799		39.3785	7.32788
	186.908	26.8461		381.505	46.0103		10.3256	5.06839
	236.188	24.2624		342.806	41.4429		14.9338	9.02134
	238.091	27.3932		239.39	60.0718		111.312	6.80357
	225.622	25.5206		985.65	61.8667		168.943	8.18856
	234.334	16.9146		746.452	56.6328		141.291	9.65492
	135.699	18.3572		310.889	54.5312		155.106	6.42764
	111.115	25.6643		505.709	58.9914		133.135	4.82748
	155.331	23.4145		382.448	56.0303		114.873	6.87633
	140.933	21.5995		431.978	58.3083		100.152	7.31153
	184.365	23.6962		842.938	60.0291		204.382	8.96777
	171.782	34.2351		559.974	65.0779		216.502	10.7683
	254.334	38.374		430.718	61.7228		6.11543	12.0613
	374.164	18.5856		468.171	64.3376		141.42	10.634
	325.692	31.3319		333.072	57.6746		100.508	4.93327
	136.32	28.7131		339.722	61.9205		118.652	3.75102
	120.347	34.955		311.916	62.5574		116.535	5.17952
	423.297	29.9479		275.357	55.9462		93.6562	5.24285
	143.542	32.8521		1.02216	45.9099		93.9857	7.36683
	139.262	24.9935		348.491	49.0893		108.576	9.15846
	145.216	29.8571		464.695	54.3019		8.25996	7.4464
	149.221	31.2762		1925.84	53.2056		151.386	8.2802
	80.0605	28.9327		1211.02	72.0333		176.849	8.62107
	93.7318	28.8392		715.089	68.8688		169.333	7.06121
	64.2372	28.8248		437.723	75.5795		194.124	7.69531
	137.873	24.8105		364.831	59.7177		132.19	7.60809
	135.687	22.1171		500.603	75.316		174.405	6.59702
	183.851	17.0312		440.469	65.9796		187.84	5.77709
	168.161	22.836		340.265	56.9104		3.57943	11.9524
	258.308			500.092	62.3654		316.144	12.4532
	304.59			400.923	34.4739		161.297	9.42965
	352.572			402.709	41.7533		158.99	15.8369
	385.404			383.505	50.4052		183.605	11.742
	191.431			346.887	64.6763		120.058	10.5064
	148.574			496.362	53.568		94.403	4.17452
	167.904			266.717	62.4654		107.897	4.18864
	155.852			242.416	61.28		64.4321	4.30579
	123.708			784.534	65.4654		73.932	4.71415
	137.1			567.968	57.7469		60.0014	5.39426
	87.9181			255.158	43.9315		87.2392	1.54594
	104.208			382.091	48.068		87.4193	2.30196
	203.663			453.956	59.989		29.1295	5.91561
	71.336			234.811	47.8502		39.6321	2.18377
	143.465			664.382	60.6877		109.084	7.15446
	154.266			421.631	61.6515		118.393	6.97979
	145.233			694.724	54.1964		50.5492	9.42506
	136.431			417.387	59.8568		59.2173	4.57028
	263.651			717.96	64.6732		131.128	6.9492
	186.12			497.088	68.0054		171.891	6.35868
	190.05			1309.52	55.492		135.7	5.35879
	174.021			1198.49	54.625		133.013	8.03863
	302.458			75.5828	9.13858		83.3925	7.69869
	128.763			641.695	89.1924		143.693	6.23827
	164.614			38.9079	85.0331		97.3957	5.15252
	180.205			329.873	57.4736		117.117	4.53569
	182.961			373.941	58.6387		177.904	6.30293
	223.502			960.175	54.6951		84.4466	6.64506
	217.358			659.67	55.9269		91.5718	4.71494
	190.371			310.332	49.4097		82.9598	4.72418
	190.392			1072.06	48.1076		97.8142	8.36777
	173.202			1364.44	46.0399		153.303	6.52237
	198.248			477.759	46.2864		114.517	8.0924
	187.721			489.924	41.2294		108.237	8.63847
	195.873			453.72	65.904		104.434	6.2531
	202.869			426.015	56.8558		105.423	8.99638
	348.107			1444.25	55.3359		47.5547	7.21954
	407.163			1084.88	60.9524		47.2901	4.73061
	153.731			1330.25	52.2416		51.7736	10.8601
	180.186			2130.57	62.0916		108.231	11.3365
	177.376			1377.12	60.3741		121.795	10.387
	159.563			1134.15	62.6369		96.6269	7.83086
	143.487			881.729	59.8572		107.094	9.05109
	242.903			1008.22	57.8661		207.999	11.2218
	226.497			1043.39	44.7815		131.419	11.3749
	339.19			800.405	50.2255		150.044	10.4683
	214.115			653.905	11.4006		146.316	8.43139
	165.454			468.18	44.1796		124.465	10.5662
	149.99			2353.21	44.1872		123.406	12.9478
	188.08			316.507	43.016		105.723	11.9716
	75.6752			433.843	50.2181		166.209	9.3279
	114.356			324.895	59.464		149.998	7.70695
	156.553			326.011	68.8442		306.149	11.2927
	224.357			1036.38	59.1416		219.746	9.85044
	234.633			1437.15	66.9055		180.955	10.3535
	193.861			1494.84	8.43332		214.284	10.3728
	155.449			1834.97	53.9477		323.579	9.88374
	158.845			1135.19	59.1267		409.259	10.6993
	80.9713			850.73	54.4161		103.023	10.2396
	105.554			899.324	59.0496		116.163	0.865051
	121.508			627.907	57.8051		144.577	12.4891
	148.606			424.2	64.399		142.487	8.75777
	185.244			323.539	46.1279		134.373	13.0296
	142.494			353.839	39.4154		210.227	12.3165
	146.319			679.138	5.48087		222.169	13.5305
	82.6737			427.475	52.2572		154.522	1.13771
	106.293			273.871	56.3546		146.703	11.632
	96.4065			672.967	77.7393		125.186	7.7285
	119.309			1170.09	70.6286		129.574	8.519
	169.913			680.867	71.9596		203.225	9.819
	144.356			528.858	47.9716		223.636	10.1888
	236.804			699.505	59.1117		181.968	10.1191
	216.499			293.567	49.8512		175.421	10.0796
	142.866			321.609	40.5912		79.8028	11.9262
	136.27			434.044	32.0063		99.751	10.9725
	144.766			485.307	34.9302		85.7788	13.312
	421.518			414.046	53.1599		44.6885	9.43872
	351.251			1571.07	50.9911		56.6593	12.9794
	279.149			1555.8	39.2472		130.151	10.7034
	149.647			1814.44	39.0028		133.862	10.4438
	163.022			912.154	48.3172		81.836	9.01335
	81.8027			1792.85	41.3594		80.2901	12.2762
	97.7292			1486.71	47.0443		128.575	10.922
	212.124			493.478	37.0944		101.231	9.85603
	171.622			606.268	41.0044		141.627	8.32167
	172.536			532.384	50.7058		186.114	12.8121
	214.15			207.814	59.0862		100.793	15.5136
	183.677			181.849	67.9566		134.309	13.7688
	218.468			193.978	59.0552		151.719	13.5887
	216.558			172.363	63.5257		118.279	13.0845
	205.07			34.0761	59.5217		109.785	10.7284
	181.646			711.913	43.6813		57.4629	12.4572
	221.471			564.027	81.7252		151.07	11.5681
	156.808			382.437	60.3557		71.155	14.0707
	177.202			332.897	72.7652		103.813	12.815
	205.246			298.791	70.2759		80.1961	17.0431
	95.766			378.718	46.3028		103.599	13.7619
	79.5551			364.74	55.6772		129.617	8.84842
	146.937			134.403	50.9846		133.913	9.49103
	144.461			443.302	46.7524		64.8079	13.496
	278.436			430.708	53.3177		90.3541	12.0277
	314.577			287.399	59.3149		109.251	15.705
	311.576			206.012	48.2475		143.839	13.5537
	371.443			313.303	52.5511		9.0481	5.8636
	481.91			329.434	68.3137		28.2764	8.25862
	75.7532			410.239	65.5577		12.2703	8.765
	129.541			409.469	62.7008		128.916	10.9466
	212.554			367.239	64.4513		112.725	13.0555
	184.892			419.553	73.8028		70.6473	8.99579
	152.024			533.588	66.449		117.424	15.0758
	111.775			67.9948	56.6282		181.312	14.8334
	182.887			313.399	68.7132		146.085	12.1061
	121.979			301.53	75.1941		147.899	10.2251
	131.984			559.848	70.7982		169.496	13.1678
	156.136			414.295	66.2812		120.331	13.5572
	158.12			298.739	66.0061		146.462	11.3197
	113.287			410.09	62.0185		116.535	11.6739
	108.896			337.115			132.46	12.12
	65.3166			370.979			74.5209	12.0874
	159.661			327.833			65.1447
	171.49			476.85			115.573
	161.42			197.822			102.507
	300.418			165.48			116.97
	74.3681			371.119			238.964
	99.0447			306.271			159.825
	146.63			143.894			187.801
	110.652			110.113			239.258
				791.445			214.466
				304.704			187.38
				354.122			49.2072
				452.651			60.0254
				655.069			81.4478
				933.989			137.549
				347.621			143.181
				873.705			118.927
				760.231			83.5654
				863.929			106.753
				602.109			125.134
				806.748			120.645
				719.909			140.58
				717.822			125.286
				735.158			146.723
				532.573			120.992
				582.107			125.595
				487.861			153.498
				535.051			106.881
				23.4924			121.056
				322.485			93.4219
				729.408			3.89967
				534.137			144.11
				53.4174			130.538
				196.022			116.183
				301.183			104.173
				394.661			84.2546
				415.941			79.618
				406.94			73.0787
				793.013			96.5703
				1045.1			70.193
				226.961			123.61
				326.132			126.216
				60.3611			238.053
				240.878			359.337
				395.834			113.776
				523.583			139.851
				610.365			137.252
				285.885			82.9512
				217.931			120.783
				451.665			47.6899
				431.55			69.6286
				228.599			114.821
				171.312			6.36501
				739.525			83.3052
				360.583			102.229
				418.6			113.118
				509.822			115.597
				740.34			127.457
				380.159			86.5719
				369.291			116.352
				457.137			85.0067
				239.322			96.1955
				228.196			90.4314
				257.229			67.4103
				381.781			2.09831
				507.629			1.53408
				465.717			1.4333
				414.217			0.96048
				297.565			108.503
				293.159			91.7771
				245.159			93.729
				282.09			105.561
				380.662			56.6166
				273.192			90.1721
				14.382			93.6978
				315.199			101.11
				320.348			83.9792
				386.824			92.3697
				28.4904			97.53
				20.4946			92.9341
				269.616			66.0594
				94.0375			111.556
				728.806			73.2217
				536.49			75.0907
				364.942			70.4472
				535.21			70.8062
				795.584			139.192
				708.135			109.269
				312.986			84.6709
				231.919			84.6053
				286.151			107.834
				220.119			68.2649
				517.816			64.061
				540.587			58.2195
				536.909			57.6731
				558.668			52.1101
				511.226			56.7858
				564.832			57.5626
				633.017			53.5467
				736.984			74.8062
				659.367			60.6404
				607.614			54.3833
				609.115			69.556
				291.548			50.9239
				312.171			49.9468
				310.524			62.0875
				407.3			62.2678
				342.014			94.8906
				461.595			61.653
				433.404			102.931
				362.655			86.2957
				400.618			139.422
				340.56			116.553
				366.673			296.779
				355.446			49.3248
				343.787			36.4531
				522.462			95.1595
				549.485			86.6744
				224.869			47.8558
				224.781			49.5748
				215.152			102.257
				187.678			93.6885
				172.594			105.954
				225.13			68.4285
				288.977			114.285
				263.227			140.19
				268.13			122.709
				572.824			131.722
				417.15			119.908
				452.673			60.0056
				793.713			63.548
				447.434			69.2335
				415.712			70.7021
				678.694			60.9444
				774.837			61.4775
				682.136			79.6609
				10.6894			111.067
				199.458			72.4344
				227.531			57.732
				11.3642			78.0285
				455.142			81.9712
				195.072			79.0376
				275.989			55.1078
				7.47235			54.7957
				794.276			14.9694
				336.399			13.2014
				383.135			17.3563
				375.266			111.266
				349.309			148.154
				979.57			122.502
				348.291			149.123
				670.357			116.911
				347.887			132.559
				540.325			95.5559
				408.675			86.7932
				271.883			107.733
				190.169			92.0044
				412.837			108.797
				415.861			142.173
				491.196			113.474
				143.61			135.957
				105.987			71.1454
				222.236			195.465
				184.542			135.112
				189.943			154.053
				211.907			7.15046
				327.395			2.97511
				212.095			108.969
				212.066			86.669
				272.242			123.568
				218.458			133.263
				97.2921			153.036
				99.3357			174.833
				175.652			92.7188
				132.515			108.711
				13.5958			155.83
				1118.85			158.39
				1159			149.19
				671.605			210.146
				659.033			79.526
				945.592			114.124
				801.772			49.4657
				833.276			60.7067
				649.714			57.5808
				555.223			49.0141
				475.767			101.81
				352.481			135.887
				319.012			109.902
				453.973			155.64
				632.789			122.896
				210.571			108.449
				298.84			97.8455
				314.804			117.282
				178.054			102.067
				201.295			59.0779
				477.497			103.24
				457.014			90.4501
				555.347			117.764
				376.805			152.979
				299.066			125.27
				249.904			134.399
				682.231			90.9767
				671.117			73.8697
				460.823			107.214
				582.783			111.455
				459.266			138.198
				572.743			88.9381
				444.755			111.832
				732.986			91.6892
				566.985			199.659
				490.721			166.875
				454.828			221.393
				404.462			166.08
				387.568			176.192
				422.938			134.728
				357.612			89.4774
				291.63			84.7059
				462.024			110.131
				497.234			112.158
				483.302			91.8622
				419.876			88.5098
				433.273			92.659
							129.913
							129.105
							141.24
							157.227
							77.8469
							84.3232
							49.3569
							46.2495
							109.4
							97.9966
							79.8733
							67.4879
							92.9319
							63.2052
							108.952
							142.962
							92.8028
							104.365
							72.6441
							106.479
							127.15
							148.498
							105.143
							107.451
							86.4958
							43.9416
							60.9505
							88.6633
							86.0327
							112.119
							139.024
							79.2091
							73.1766
							126.063
							126.781
							128.148
							106.948
							82.9377
							97.3869
							141.853
							94.7923
							108.312
							1.84784
							52.6011
							54.7437
							119.735
							93.6216
							96.8322
							84.2339
							90.2422
							70.866
							88.8779
							66.411
							97.7252
							110.563
							93.1358
							107.905
							89.3911
							63.5962
							104.422
							113.553
							114.028
							83.1683
							67.2369
							98.8471
							76.2277
							60.8593
							71.3489
							83.6535
							70.8363
							71.9303
							119.442
							142.935
							49.1058
							39.0601
							98.3167
							103.419
							113.768
							124.547
							8.33673
							87.8784
							85.5686
							73.5447
							95.5718
							89.7833
							83.1753
							105.927
							100.267
							51.16
							48.4666
							53.6313
							68.4035
							63.4557
							133.166
							101.051
							133.123
							131.927
							91.232
							101.457
							133.552
							87.0617
							93.1661
							93.2424
							113.078
							115.111
							114.84
							99.0119
							82.3095
							102.858
							18.4182
							32.9925
							15.8546
							24.0739
							95.4233
							83.5226
							122.681
							114.103
							138.919
							101.302

## Sheet: FloA complementation
#1					#2					#3
raw		normalized			raw		normalized			raw		normalized
FloA-SNAP	dFloA comp.	FloA-SNAP	dFloA comp.		FloA-SNAP	dFloA comp.	FloA-SNAP	dFloA comp.		FloA-SNAP	dFloA comp.	FloA-SNAP	dFloA comp.
850.985	987.144	0.670417	0.777685		1232.19	1844.36	1.15733	1.73232		540.438	1351.39	0.576137	1.44065
1341.36	917.196	1.05674	0.722579		530.092	1142.14	0.497888	1.07275		539.756	896.749	0.57541	0.955983
1564.88	915.225	1.23284	0.721027		737.384	1136.92	0.692587	1.06785		902.606	1725.98	0.962227	1.83999
1570.73	990.212	1.23744	0.780102		1437.33	1143.76	1.35001	1.07427		1090.9	1812.18	1.16296	1.93188
1273.21	1549.11	1.00305	1.22041		968.092	509.996	0.909278	0.479013		816.963	1389.04	0.870928	1.48079
1256.19	1394.68	0.989644	1.09875		734.216	1593.48	0.689611	1.49667		505.604	1285.36	0.539001	1.37026
936.247	1698.28	0.737588	1.33793		592.663	501.727	0.556658	0.471246		781.763	1366.81	0.833402	1.4571
1179.55	1619.04	0.929267	1.2755		916.591	562.36	0.860906	0.528196		519.287	1925.47	0.553588	2.05266
1451.55	1714.27	1.14355	1.35052		1318.86	1062.22	1.23874	0.997686		984.916	1631.5	1.04997	1.73927
1315.47	1688.08	1.03634	1.32989		542.45	899.043	0.509495	0.844424		513.086	1790.65	0.546978	1.90893
1537.65	1222.44	1.21138	0.963057		846.646	518.548	0.79521	0.487045		1176.39	1671.22	1.2541	1.78161
1536.87	1279.41	1.21076	1.00794		934.611	1032.96	0.877831	0.970203		937.609	3579.31	0.999542	3.81574
1475.38	889.372	1.16232	0.700659		534.27	1859.22	0.501813	1.74627		713.373	1302.21	0.760494	1.38822
1438.25	1596.74	1.13307	1.25793		774.669	527.59	0.727607	0.495538		1026.9	962.437	1.09473	1.02601
1429.81	1772.94	1.12643	1.39675		810.727	892.435	0.761474	0.838218		596.774	1528.89	0.636194	1.62988
1410.19	1866.82	1.11097	1.4707		1061.1	1303.26	0.996633	1.22408		654.044	1406.79	0.697247	1.49971
1435.46	1627.33	1.13087	1.28203		1345.42	1095.79	1.26369	1.02922		706.428	1735.23	0.753091	1.84985
2040.59	1743.49	1.6076	1.37354		1975.6	845.924	1.85558	0.794533		1619.76	1536.85	1.72675	1.63836
2382.46	1661.95	1.87693	1.30931		1967.87	596.857	1.84832	0.560597		887.896	1771.36	0.946546	1.88837
1468.46	1795.71	1.15687	1.41469		1034.11	865.307	0.971288	0.812738		877.952	1603.18	0.935945	1.70908
872.535	1604.62	0.687395	1.26414		989.616	800.907	0.929495	0.75225		969.968	1215.28	1.03404	1.29556
1728.59	1639.04	1.36181	1.29126		1003.19	780.847	0.942242	0.733409		902.414	1189.48	0.962022	1.26805
1746.38	1677.55	1.37582	1.32159		1076.1	797.647	1.01073	0.749189		803.682	940.177	0.856769	1.00228
1840.45	2472.22	1.44993	1.94765		1103.13	919.125	1.03612	0.863287		875.315	1365.25	0.933133	1.45543
1855.7	1261.01	1.46195	0.99344		1077.62	1021.91	1.01215	0.959824		861.67	1463.14	0.918588	1.55978
1336.58	1217.03	1.05298	0.958789		902.064	988.101	0.847262	0.928073		826.266	1547.3	0.880845	1.6495
1104.34	1268.84	0.870013	0.999608		957.211	782.977	0.899058	0.73541		759.864	1415.16	0.810056	1.50864
1251.34	1259.59	0.985823	0.992324		898.022	962.735	0.843466	0.904247		838.594	1668.5	0.893987	1.77871
1303.27	2269.92	1.02673	1.78827		1003.08	1198.43	0.942137	1.12563		761.273	2176.27	0.811558	2.32002
1221.08	2075.9	0.961987	1.63542		1107.95	1369.16	1.04064	1.28598		814.444	1719.83	0.868242	1.83343
1213.66	2336.04	0.956135	1.84036		1110.86	784.455	1.04338	0.736798		777.211	1679.8	0.828549	1.79076
1237.22	2115.5	0.974701	1.66662		1281.15	821.166	1.20332	0.771279		893.217	2240.5	0.952219	2.3885
1194.17	1460.34	0.940786	1.15047		792.971	939.59	0.744797	0.882508		1031.83	2046.63	1.09999	2.18182
1436.19	1490.67	1.13145	1.17437		918.678	959.596	0.862867	0.901299		1146.01	1498.34	1.22171	1.59732
1459.64	1507.41	1.14992	1.18755		1168.07	832.167	1.09711	0.781612		986.801	1672.43	1.05198	1.7829
1837.2	1623.62	1.44737	1.27911		973.181	1020.31	0.914058	0.95832		789.184	2052.87	0.841313	2.18847
1671.05	1305.8	1.31648	1.02873		1168.19	2116.69	1.09722	1.9881		564.567	1900.07	0.601859	2.02558
2102.69	1407.07	1.65653	1.10851		706.646	2388.57	0.663716	2.24346		557.105	1411.32	0.593905	1.50455
2098.76	1539.09	1.65343	1.21252		728.064	2342.15	0.683833	2.19986		992.2	1457.36	1.05774	1.55362
1927.66	1629.31	1.51864	1.28359		913.623	1813.49	0.858119	1.70332		981.802	1512.82	1.04665	1.61275
2122.58	1294.13	1.67219	1.01953		1542.97	1069.4	1.44923	1.00444		630.984	1143.61	0.672663	1.21915
1198.46	1493.5	0.94416	1.1766		1021.28	1224.56	0.959234	1.15017		809.516	1191.47	0.862989	1.27017
1190.67	1560.83	0.938023	1.22964		1587.51	806.952	1.49107	0.757929		875.722	1596.4	0.933567	1.70185
1307.2	1345.84	1.02983	1.06027		1054.34	998.183	0.990286	0.937542		1037.1	1637.09	1.1056	1.74523
1172.48	1240.77	0.923697	0.977498		1051.5	1032	0.987622	0.969304		1084.32	1202.71	1.15595	1.28215
1156.56	1283.58	0.911152	1.01122		1175.96	1077.37	1.10452	1.01192		517.43	1238.79	0.551609	1.32062
1207.23	1542.37	0.951071	1.2151		1069.92	989.3	1.00492	0.929198		713.871	965.767	0.761026	1.02956
1712.17	1237.44	1.34887	0.974874		1244.51	923.718	1.1689	0.867601		652.692	976.253	0.695806	1.04074
1849.64	1266.31	1.45717	0.997614		1184.27	1006.91	1.11233	0.94574		1027.44	946.695	1.09531	1.00923
1452.32	1524.11	1.14416	1.20071		965.228	1130.02	0.906589	1.06137		995.105	963.094	1.06084	1.02671
1523.77	1501.86	1.20045	1.18319		980.616	883.916	0.921042	0.830217		909.259	1314.88	0.969319	1.40174
1676.4	1510.63	1.32069	1.19009		818.754	874.016	0.769013	0.820918		957.731	1490.49	1.02099	1.58895
1551.26	1509.53	1.22211	1.18923		919.888	1220.44	0.864004	1.1463		944.871	1885.08	1.00728	2.0096
1578.64	1095.12	1.24368	0.862749		1093.09	1490.09	1.02668	1.39957		788.184	1594.89	0.840247	1.70024
1611.66	1696.68	1.26969	1.33667		1071.69	1444.21	1.00658	1.35647		793.257	1038.01	0.845656	1.10658
1512.45	1853.81	1.19152	1.46046		1096.58	831.859	1.02997	0.781322		716.903	1042.72	0.764258	1.1116
1598.39	1841.26	1.25923	1.45057		1085.89	815.142	1.01992	0.765621		534.394	1291.49	0.569693	1.3768
1520.64	1748.38	1.19798	1.3774		681.215	1556.01	0.63983	1.46148		516.064	1338.09	0.550152	1.42647
1777.53	1314.67	1.40036	1.03571		699.484	1944.56	0.656989	1.82643		972.966	1262.71	1.03723	1.34612
1624.79	1381.41	1.28003	1.08829		1094.48	1480.92	1.02799	1.39095		950.928	1369.5	1.01374	1.45996
874.56	1332.06	0.68899	1.04941		1240.37	2852.18	1.16501	2.6789		770.399	1295.84	0.821287	1.38143
1214.23	1434.08	0.956589	1.12979		1224.64	2474.83	1.15024	2.32448		870.061	1360.58	0.927533	1.45046
1330.51	1675.96	1.04819	1.32035		853.78	1412.63	0.801912	1.32681		829.872	1252.6	0.884689	1.33534
1580.14	1694.93	1.24485	1.33529		768.2	852.749	0.721531	0.800943		956.489	1233.28	1.01967	1.31474
1795.64	1044.61	1.41463	0.822957		786.353	744.798	0.738581	0.69955		916.724	1338.63	0.977278	1.42705
1385.27	1041.55	1.09133	0.820551		1535.36	920.64	1.44209	0.864709		1025.65	1450.49	1.0934	1.5463
1432.31	1058.79	1.12839	0.834125		1311.42	978.198	1.23175	0.91877		1067.94	2252.77	1.13848	2.40158
1545.33	1057.03	1.21743	0.832743		1744.62	717.26	1.63863	0.673686		1053.1	2388.62	1.12267	2.5464
1752.18	937.897	1.38039	0.738887		1169.66	691.368	1.0986	0.649366		831.296	1729.4	0.886207	1.84364
1537.27	950.51	1.21108	0.748825		1158.01	807.894	1.08766	0.758813		808.154	1679.67	0.861536	1.79062
1367.32	924.681	1.07719	0.728476		1178.73	916.835	1.10712	0.861136		1054.84	1693.51	1.12452	1.80537
1159.93	915.533	0.913811	0.721269		910.495	1276.62	0.855181	1.19906		1072.86	1692.95	1.14373	1.80478
1278.8	1378.1	1.00745	1.08569		860.879	1449.12	0.80858	1.36108		1126.28	1694.07	1.20067	1.80597
1243.8	1312.28	0.979881	1.03383		836.525	2023.09	0.785705	1.90018		1157.06	1767.96	1.23349	1.88475
1076.54	1537.23	0.848116	1.21105		861.824	1523.66	0.809466	1.4311		777.847	1699.44	0.829227	1.8117
1102.14	1408.2	0.868279	1.1094		905.743	1491.71	0.850717	1.40109		870.837	1677.51	0.92836	1.78832
2086.27	1505.72	1.64359	1.18623		877.079	1255.65	0.823795	1.17936		911.031	1339.99	0.971209	1.42851
1383.32	1573.66	1.0898	1.23975		908.959	906.02	0.853738	0.850977		835.624	1364.87	0.89082	1.45503
1675.42	1439.61	1.31992	1.13415		969.051	939.02	0.91018	0.881973		801.019	2130.9	0.85393	2.27166
1423.7	1473.8	1.12161	1.16108		719.447	774.867	0.675739	0.727793		1078.18	2081.24	1.1494	2.21871
1652.03	1389.01	1.30149	1.09428		749.757	1128.99	0.704208	1.0604		856.573	1462.43	0.913154	1.55903
1880.3	1407	1.48132	1.10845		1078.91	643.994	1.01337	0.604871		1034.46	1044.91	1.10279	1.11394
1321.7	1572.97	1.04125	1.23921		921.555	714.636	0.865569	0.671221		1132.03	1025.89	1.2068	1.09366
1335.97	1767.91	1.0525	1.39278		967.92	1148.76	0.909117	1.07897		915.068	980.584	0.975512	1.04536
1513.84	1415.19	1.19262	1.1149		1116.22	1266.64	1.0484	1.18969		1051.63	1112.16	1.1211	1.18563
1402.31	1484.38	1.10476	1.16942		1180.33	869.223	1.10862	0.816416		1349.75	1289.27	1.43891	1.37443
1495.64	1655.14	1.17828	1.30394		870.197	998.87	0.817331	0.938187		1043.84	1384.99	1.11279	1.47648
1634.23	1696.49	1.28747	1.33652		938.355	956.494	0.881348	0.898385		1029.86	1590.34	1.09789	1.69539
1678.04	1153.06	1.32198	0.908394		702.538	1079.8	0.659858	1.0142		1036.88	1702.56	1.10537	1.81502
1723.81	1150.67	1.35804	0.906512		724.681	936.525	0.680655	0.87963		918.414	1552.64	0.97908	1.6552
2130.58	1473.55	1.6785	1.16088		882.861	1030.65	0.829225	0.968038		779.607	1599.8	0.831103	1.70548
2393.58	1807	1.88569	1.42358		882.741	987.908	0.829113	0.927891		937.33	1512.37	0.999245	1.61227
1605.21	1617.2	1.26461	1.27405		771.575	930.645	0.7247	0.874107		657.71	1593.29	0.701154	1.69853
1525.19	1460.99	1.20156	1.15099		756.349	1172.2	0.7104	1.10098		699.846	1637.44	0.746074	1.7456
1334.87	1040.57	1.05163	0.819774		659.749	1153.81	0.619668	1.08371		972.014	1657.7	1.03622	1.76719
1142.49	1068.77	0.900068	0.841988		660.971	769.377	0.620816	0.722636		1050.23	1487.54	1.11961	1.5858
1179.07	1137.67	0.928887	0.896274		803.315	821.284	0.754512	0.77139		1058.92	1818.23	1.12886	1.93833
1126.64	1055.21	0.887581	0.831312		791.33	1136.49	0.743255	1.06745		980.598	1910.14	1.04537	2.03632
1153.95	1339.71	0.909095	1.05544		823.702	1535.01	0.773661	1.44176		775.858	1716.81	0.827107	1.83022
1155.11	1476.55	0.910013	1.16324		794.571	1032.82	0.7463	0.970071		1221.85	1805.63	1.30256	1.9249
1896.54	1137.46	1.49412	0.896106		1003.8	1197.84	0.942819	1.12507		1221.46	1228.63	1.30215	1.30979
1465.25	1494.78	1.15434	1.17761		1088.32	1626.01	1.02221	1.52723		1148.37	1339.82	1.22422	1.42832
1741.92	1203.94	1.3723	0.948479		1091.75	865.282	1.02543	0.812714		1124.49	2790.81	1.19877	2.97515
1722.02	1199.04	1.35663	0.944621		1087.07	929.321	1.02102	0.872863		928.936	2066.49	0.990297	2.20299
1775.56	1445.26	1.39881	1.13859		1037.98	501.741	0.974919	0.471259		1169.25	3535.41	1.24649	3.76894
1771.67	1473.83	1.39574	1.1611		991.451	509.796	0.931219	0.478825		1091.31	1502.24	1.1634	1.60147
1317.54	1750.22	1.03797	1.37884		861.678	1157.99	0.809329	1.08764		985.972	1374.93	1.0511	1.46575
1229.94	1751.93	0.968963	1.38019		1001.75	1234.35	0.940888	1.15936		1064.6	1560.03	1.13492	1.66308
1169.82	1669.26	0.921599	1.31507		961.305	1083.33	0.902904	1.01752		1155.63	1923.01	1.23197	2.05004
1228.49	1317.23	0.967823	1.03773		1047.81	974.898	0.984152	0.915671		838.062	1803.93	0.89342	1.92309
1120.7	1880.6	0.882899	1.48156		996.621	996.72	0.936075	0.936168		906.131	1069.86	0.965985	1.14053
1181.02	1614.19	0.930423	1.27168		975.708	1034.8	0.916432	0.971937		737.556	1494.52	0.786275	1.59324
1258.6	1863.65	0.991543	1.46821		974.378	949.911	0.915183	0.892203		752.816	1118.44	0.802544	1.19232
1314.54	1190.23	1.03561	0.937678		1128.42	1024.62	1.05986	0.962374		1237.58	896.5	1.31933	0.955718
1373.72	1207.38	1.08224	0.95119		1149.06	951.221	1.07926	0.893433		1251.66	1998.75	1.33434	2.13078
1243.07	1768.47	0.979305	1.39323		1194.39	1015.84	1.12182	0.954125		1000.24	1695.43	1.06631	1.80743
1190.4	2038.04	0.937813	1.6056		1253.29	1103.05	1.17715	1.03604		1157.95	1604.42	1.23443	1.7104
1250.52	2458.05	0.985176	1.93649		1579.07	847.096	1.48314	0.795633		1066.93	1545.8	1.13741	1.64791
1201.64	1199.03	0.946668	0.94461		1666.13	1003.62	1.56491	0.94265		915.1	1716.98	0.975547	1.8304
2029.38	1203.31	1.59877	0.947987		1250.69	975.86	1.17471	0.916575		930.557	1699.08	0.992025	1.81131
2404.74	1941.73	1.89448	1.52972		1200.24	1052.08	1.12733	0.988165		900.765	1497.51	0.960265	1.59642
1811.41	1774.14	1.42705	1.39769		1215.06	2241.28	1.14124	2.10512		912.632	1441.88	0.972915	1.53713
1076.03	1765.32	0.847714	1.39074		1089.69	1980.58	1.02349	1.86025		774.653	1465.37	0.825823	1.56216
1624.38	1699.5	1.27971	1.33889		1032.69	1937.5	0.969952	1.81979		763.02	1465.87	0.813421	1.5627
1608.56	1880.23	1.26725	1.48127		1092.44	1983.89	1.02607	1.86337		591.122	1230.02	0.630169	1.31127
1643.31	1337.82	1.29462	1.05396		1015.43	2113.75	0.953743	1.98534		613.81	1341.16	0.654355	1.42975
1824.72	1738.64	1.43754	1.36972		1068.2	681.817	1.0033	0.640395		637.495	1379.71	0.679605	1.47085
2086.61	1499.59	1.64386	1.1814		1303.46	686.465	1.22427	0.644761		849.53	1401.31	0.905645	1.49387
2102.41	1775.69	1.65631	1.39891		758.171	1099.78	0.712111	1.03296		1439.8	1350.09	1.5349	1.43927
1552.55	1889.63	1.22312	1.48868		1733.08	1449.94	1.62779	1.36186		628.096	1404.36	0.669585	1.49713
1901.12	1959.27	1.49773	1.54354		1129.4	723.659	1.06079	0.679695		524.545	1361.1	0.559194	1.45101
1771.37	1920.34	1.39551	1.51287		1197.36	762.67	1.12461	0.716336		624.877	1290.65	0.666153	1.37591
1750.14	1828.08	1.37879	1.44018		1021.01	1156.58	0.958984	1.08631		1165.68	1728.03	1.24268	1.84217
1697.37	1713.53	1.33721	1.34994		600.061	1320.32	0.563606	1.24011		1244.28	1353.86	1.32647	1.44329
1222.76	1784.3	0.963304	1.40569		789.133	822.7	0.741192	0.77272		790.435	1443.38	0.842647	1.53872
1205.86	2140.83	0.949995	1.68658		1221.21	841.27	1.14702	0.790162		1116.05	1431.67	1.18977	1.52624
1189.38	2242.62	0.937009	1.76677		1092.47	1105.61	1.0261	1.03844		1008.46	1482.49	1.07507	1.58042
1360.5	1698.93	1.07182	1.33844		891.677	1179.9	0.837506	1.10822		1108.31	1134.44	1.18152	1.20937
1540.75	1733.08	1.21382	1.36534		835.158	1159.07	0.784421	1.08865		966.347	1183.64	1.03018	1.26182
1543.42	1368.18	1.21593	1.07787		1063.03	1214.35	0.998446	1.14058		1041.45	1610.91	1.11024	1.71732
1608.85	1572.92	1.26747	1.23917		1088.66	1094.09	1.02252	1.02762		1050.83	1651.01	1.12025	1.76007
1598.61	1611.85	1.2594	1.26984		690.53	1238.33	0.648579	1.1631		1152.78	884.658	1.22893	0.943093
1565.16	2558.01	1.23305	2.01523		874.978	869.191	0.821822	0.816386		1004.33	1576.86	1.07067	1.68102
594.987	2596.58	0.468739	2.04562		926.102	951.009	0.86984	0.893234		980.212	1538.63	1.04496	1.64027
882.119	3544.35	0.694945	2.79229		774.676	1011.68	0.727613	0.950219		1026.51	1682.69	1.09432	1.79384
574.368	1475.99	0.452495	1.1628		531.136	1060.54	0.498868	0.996115		1003.48	1817.56	1.06977	1.93762
892.809	1538.64	0.703367	1.21216		1033.89	896.837	0.971084	0.842353		771.4	1670.89	0.822355	1.78126
586.047	2323.91	0.461696	1.8308		934.549	1035.56	0.877773	0.972649		695.425	1240.22	0.741361	1.32214
1427.12	2218.97	1.1243	1.74814		1585.95	755.049	1.4896	0.709179		837.66	1685.13	0.892991	1.79644
590.269	2239.19	0.465022	1.76407		1046.94	907.121	0.983341	0.852012		915.275	1431.25	0.975733	1.5258
2830.42	2238.69	2.22984	1.76367		1054.49	1361.03	0.990424	1.27835		1087.87	1614.06	1.15973	1.72068
1798.99	2104.2	1.41727	1.65772		822.846	1263.4	0.772857	1.18665		1232	1394.32	1.31338	1.48642
1187.48	2068.76	0.935513	1.62979		1095.38	973.21	1.02883	0.914086		1052.63	1458.88	1.12217	1.55525
2269.5	1292.03	1.78794	1.01788		977.184	1119.19	0.917818	1.0512		1169.49	1354.67	1.24674	1.44415
1067.77	1314.85	0.841205	1.03586		1031.72	1147.81	0.969042	1.07808		1112.57	1432.8	1.18606	1.52744
830.702	1378.51	0.654438	1.08601		1204.57	1079.51	1.13139	1.01393		1161.89	1549.68	1.23864	1.65205
1095.04	1359.1	0.862686	1.07071		1166.36	1158.16	1.0955	1.0878		701.562	1529.89	0.747903	1.63094
1054.17	1615.8	0.830491	1.27295		783.961	1902.41	0.736334	1.78683		1002.19	1434.55	1.06839	1.52931
1189.91	1594.79	0.93743	1.2564		786.935	1492.53	0.739127	1.40185		882.129	1653.75	0.940398	1.76299
1362.31	1132.11	1.07325	0.891892		767.671	1665.06	0.721034	1.5639		976.541	1452.87	1.04105	1.54884
1838.73	1787.11	1.44858	1.40791		1138.69	1793.33	1.06951	1.68438		1204.64	1465.91	1.28422	1.56274
1659.18	1722.95	1.30712	1.35737		944.722	544.909	0.887328	0.511805		1345.79	1234.5	1.43469	1.31605
1690.81	3638.42	1.33204	2.8664		1213.06	550.315	1.13936	0.516882		959.883	1285.92	1.02329	1.37086
1116.94	1553.72	0.879943	1.22404		983.35	1385.42	0.92361	1.30125		991.716	1639.24	1.05722	1.74752
1956.73	1681.23	1.54153	1.3245		1003.61	1537.36	0.942641	1.44397		523.529	1802.07	0.55811	1.92111
814.659	1697.65	0.641799	1.33743		930.313	1732.57	0.873795	1.62732		727.631	1517.72	0.775694	1.61797
828.995	1899.91	0.653093	1.49677		1205.04	1496.06	1.13183	1.40518		1304.76	1634.03	1.39094	1.74197
915.108	2166.17	0.720934	1.70654		1128.55	1250.31	1.05999	1.17435		705.962	1836.8	0.752594	1.95813
964.654	1795.23	0.759967	1.41431		901.804	1145.38	0.847018	1.0758		705.786	1618.85	0.752406	1.72578
1047.27	1693.29	0.82505	1.334		1131.24	1222.68	1.06252	1.1484		688.026	1356.52	0.733473	1.44612
1256.72	1779.52	0.990059	1.40193		1027.56	954.211	0.965138	0.896241		999.85	1687.54	1.06589	1.79901
1232.49	1514.14	0.970972	1.19286		1171.3	633.856	1.10014	0.595349		1136.61	1392.13	1.21169	1.48408
1036.33	1742.54	0.816434	1.37279		1259.25	1077.24	1.18275	1.01179		882.176	866.889	0.940448	0.924151
1350.31	1706.89	1.06379	1.34471		1139.73	899.297	1.07049	0.844663		961.33	857.44	1.02483	0.914077
1411.7	1829.79	1.11216	1.44153		1208.18	629.764	1.13478	0.591505		684.896	1261.78	0.730136	1.34512
1601.59	1640.64	1.26176	1.29251		1017.92	989.465	0.956084	0.929353		720.736	1371.87	0.768344	1.46248
1194.33	1648.84	0.94091	1.29898		1009.59	774.395	0.948253	0.727349		748.122	1149.72	0.797539	1.22567
1385.7	1438.78	1.09167	1.13349		767.422	765.427	0.720799	0.718926		801.815	929.668	0.854779	0.991077
1238.71	1440.13	0.97587	1.13455		646.605	1244.21	0.607323	1.16862		722.188	948.339	0.769892	1.01098
1094.19	1408.74	0.86202	1.10983		744.439	1041.34	0.699213	0.97808		767.62	1638.99	0.818324	1.74725
1389.74	1484.77	1.09486	1.16973		696.65	648.427	0.654327	0.609034		820.455	1629.82	0.874649	1.73747
1590.65	1512.01	1.25314	1.19118		1219.55	869.348	1.14546	0.816534		860.062	2621.77	0.916873	2.79495
1345.13	1459.47	1.05972	1.14979		1081.45	494.502	1.01575	0.46446		909.127	2819.72	0.96918	3.00598
1421.67	1877.71	1.12001	1.47928		1094.99	1097.32	1.02847	1.03065		1118.63	2842.43	1.19252	3.03018
877.508	2770.56	0.691312	2.18269		2229.36	1613.75	2.09393	1.51571		1137.94	1228.45	1.2131	1.30959
1062.4	2003.1	0.836971	1.57807		1075.19	1462.19	1.00987	1.37336		1121.25	1339.38	1.19532	1.42785
1069.73	1338.82	0.842749	1.05474		1049.9	786.063	0.986116	0.738309		706.248	1671.78	0.752899	1.7822
978.46	1334.31	0.770844	1.05119		1119.02	504.51	1.05104	0.47386		668.964	1607.99	0.713152	1.71421
883.701	1258.64	0.696191	0.991577		1183.4	1574.32	1.11151	1.47868		1058.04	1612.81	1.12792	1.71934
1141.86	1259.18	0.899576	0.991996		1577.82	1161.95	1.48196	1.09136		1030.69	1588.55	1.09878	1.69349
1163.64	1270.12	0.916734	1.00062		1037.77	809.827	0.974719	0.760629		882.655	1094.74	0.940959	1.16706
1303.17	1764.62	1.02666	1.39019		1297.92	1129.97	1.21907	1.06132		799.926	1178.16	0.852765	1.25598
1305.49	1837.8	1.02848	1.44784		1077.84	1204.84	1.01236	1.13165		852.744	1757.8	0.909072	1.87392
1210.99	2115.44	0.954037	1.66657		639.326	1128.4	0.600486	1.05985		887.278	1826.5	0.945887	1.94715
1248.12	2069.11	0.983282	1.63007		761.079	1264.87	0.714842	1.18802		754.641	1712.31	0.804489	1.82542
1168.46	1417.36	0.920527	1.11661		1049.06	1016.93	0.985327	0.955153		791.066	1719.44	0.84332	1.83302
1350.13	1417.4	1.06365	1.11665		1157.83	1072.98	1.08749	1.0078		652.243	1519.96	0.695327	1.62036
1388.85	1512.55	1.09416	1.19161		622.593	506.443	0.584769	0.475676		640.978	1681.21	0.683317	1.79226
1428.8	1415.01	1.12563	1.11477		646.467	493.792	0.607193	0.463794		806.414	1234.51	0.859681	1.31605
1687.54	1693.81	1.32947	1.3344		938.382	1029.46	0.881374	0.966921		812.476	1341.41	0.866144	1.43001
1331.11	2029.74	1.04867	1.59906		1166.76	739.223	1.09588	0.694314		989.814	1511.39	1.0552	1.61123
1539.97	964.044	1.21321	0.759487		927.241	541.246	0.87091	0.508365		1071.6	1351.14	1.14239	1.44039
1313.62	959.448	1.03488	0.755866		1125.54	891.181	1.05716	0.83704		837.697	1900.77	0.893031	2.02633
1226.12	936.091	0.965953	0.737465		1207.62	699.724	1.13425	0.657215		824.936	1975.53	0.879427	2.10602
1072.8	939.081	0.845169	0.73982		1291.92	627.89	1.21343	0.589745		900.507	1522.05	0.959989	1.62258
1324.81	973.346	1.0437	0.766815		1219.59	727.526	1.1455	0.683327		966.789	1486.63	1.03065	1.58483
1359.33	1963.59	1.0709	1.54695		1334.68	560.804	1.2536	0.526734		1665.44	1359.48	1.77545	1.44928
1054.65	1875.5	0.83087	1.47755		937.442	1097.54	0.880491	1.03086		652.829	1488.9	0.695952	1.58725
1138.28	901.408	0.896753	0.710141		940.694	989.082	0.883546	0.928993		884.019	1467.91	0.942412	1.56487
1281.23	897.09	1.00937	0.706739		1239.13	1135.36	1.16386	1.06638		713.638	1794.24	0.760778	1.91276
1132.55	1192.7	0.892237	0.939624		829.031	880.03	0.778666	0.826567		500.207	1117.6	0.533248	1.19143
907.221	1273.8	0.714721	1.00352		783.407	985.478	0.735814	0.925608		1836.79	1768.44	1.95812	1.88526
971.015	1198.27	0.764979	0.944013		938.945	1030.65	0.881902	0.968036		580.427	1253.01	0.618766	1.33578
981.706	1174.2	0.773401	0.925049		933.193	932.054	0.8765	0.87543		546.742	1691.75	0.582857	1.8035
973.005	1731.43	0.766546	1.36405		1030.59	1023.79	0.967981	0.961588		1082.59	1605.85	1.1541	1.71192
1276.03	1655.46	1.00527	1.3042		684.621	1026.9	0.64303	0.964513		643.713	1563.62	0.686234	1.66691
1373.77	1263.66	1.08228	0.99553		702.315	1007.49	0.659648	0.946286		1073.36	1563.19	1.14426	1.66644
1217.51	1239.34	0.959169	0.97637		677.818	938.688	0.63664	0.881661		501.299	1470.41	0.534412	1.56753
1258.01	1215.99	0.991074	0.957972		713.378	820.346	0.670039	0.770509		829.716	1133.76	0.884523	1.20865
1444.65	1420.29	1.13812	1.11892		998.614	1025.46	0.937946	0.963159		690.807	1356.54	0.736438	1.44615
1234.42	1294.51	0.972491	1.01983		942.615	767.082	0.88535	0.720481		1085.37	1282.33	1.15706	1.36703
866.921	1260.72	0.682972	0.993208		770.911	928.617	0.724077	0.872202		973.128	1394.99	1.03741	1.48714
799.388	1113.66	0.629769	0.87736		754.481	807.837	0.708645	0.758759		492.669	1620.75	0.525212	1.72781
1244.54	1106.47	0.980461	0.871691		1023.13	852.875	0.960976	0.801061		665.947	1701.34	0.709936	1.81372
1125.91	1086.48	0.887005	0.85594		1848.47	955.802	1.73617	0.897736		896.856	1581.09	0.956098	1.68553
984.385	1142.62	0.775511	0.90017		1095.93	953.859	1.02935	0.895911		947.649	1522.81	1.01025	1.6234
965.376	1550.16	0.760536	1.22124		1568.21	987.486	1.47294	0.927494		995.86	1480.97	1.06164	1.5788
2720.84	1617.2	2.14352	1.27405		1153.03	1192.07	1.08298	1.11965		894.654	1504.4	0.95375	1.60378
600.656	1717.15	0.473205	1.35279		1137.85	1230.11	1.06872	1.15538		548.51	857.228	0.584742	0.913852
1286.57	1592.2	1.01358	1.25436		1051.56	1445.48	0.987674	1.35767		476.28	858.024	0.50774	0.9147
1036.46	1031.63	0.816535	0.812729		924.451	1031.67	0.868289	0.968993		739.004	1289.15	0.787819	1.37431
914.278	1022.77	0.720281	0.805753		865.561	1040.13	0.812977	0.976943		753.921	1194.89	0.803721	1.27382
999.596	1158.95	0.787495	0.913036		932.201	1092.74	0.875568	1.02635		493.301	1271.61	0.525886	1.35561
1005.73	1227.12	0.792324	0.966743		1136.73	1103.51	1.06767	1.03647		864.625	1293.31	0.921738	1.37874
955.348	1006.36	0.752636	0.792823		936.646	1695.6	0.879743	1.59259		889.608	1547.24	0.948371	1.64944
1076.26	1528.26	0.847895	1.20398		833.913	696.771	0.783251	0.654441		715.456	1496.83	0.762715	1.5957
1305.33	1721.19	1.02835	1.35598		895.441	977.424	0.841041	0.918044		478.062	1313.68	0.50964	1.40045
1290.74	1284.29	1.01686	1.01178		809.555	995.429	0.760373	0.934955		1390.79	1332.95	1.48266	1.421
1315.28	1315.3	1.0362	1.03621		1270.85	1074.41	1.19364	1.00914		798.156	1465.59	0.850878	1.5624
1419.53	1564.23	1.11833	1.23232		1072.5	998.279	1.00735	0.937631		781.112	1553.97	0.832708	1.65662
1386.33	1482.76	1.09217	1.16814		1410.97	1289.94	1.32525	1.21158		924.826	1544.26	0.985915	1.64626
1236.75	1278.27	0.974326	1.00704		1231.01	1311	1.15622	1.23135		980.203	1199.48	1.04495	1.27871
1101.33	1441.97	0.867645	1.13601		1359.53	1127.26	1.27694	1.05878		1010.33	1466.27	1.07707	1.56313
1468.54	1327.22	1.15693	1.0456		935.719	1201.44	0.878872	1.12845		1016.73	1574.77	1.08389	1.67879
1499.54	1425.91	1.18136	1.12335		1172.88	1323.35	1.10162	1.24295		818.732	1721.68	0.872813	1.83541
1190.65	1171.41	0.93801	0.922852		1133.32	1345.58	1.06446	1.26384		890.269	1627.17	0.949075	1.73466
1511.48	1191.57	1.19076	0.938733		1154.29	775.38	1.08417	0.728275		839.468	1580.62	0.894919	1.68503
1527.62	1130.9	1.20348	0.890937		1127.39	493.231	1.0589	0.463266		965.298	1593.19	1.02906	1.69843
1485.84	1240.59	1.17056	0.97735		1099.71	1100.21	1.0329	1.03337		1021.64	1583.94	1.08913	1.68857
1436.98	1323.87	1.13207	1.04296		1027.98	1120.87	0.965528	1.05277		811.889	1705.83	0.865519	1.81851
1029.6	1328.44	0.811131	1.04657		1124.44	2888.88	1.05612	2.71338		895.793	1863.25	0.954965	1.98632
1068.8	1398.08	0.842016	1.10142		1240.5	2870.25	1.16514	2.69588		959.515	1132.88	1.0229	1.20771
1196.53	1388.62	0.942646	1.09397		772.922	1272.88	0.725966	1.19555		488.644	1173.52	0.520922	1.25103
1035.96	1451.61	0.816143	1.14359		753.939	981.227	0.708136	0.921616		809.29	1563	0.862747	1.66625
1192.01	1469.47	0.939079	1.15767		555.9	1121.62	0.522128	1.05348		882.158	1613.23	0.940429	1.71979
1273.79	1127.07	1.00351	0.88792		784.613	1334.27	0.736947	1.25321		812.356	1451.88	0.866016	1.54778
1163.11	1089.59	0.916313	0.858396		834.069	1297.22	0.783398	1.21841		871.283	1462.73	0.928836	1.55935
1446.86	1086.08	1.13986	0.855627		849.681	993.327	0.798061	0.932981		674.705	1280.81	0.719272	1.36541
1105.53	1239.17	0.870952	0.976235		907.607	1038.16	0.852468	0.975087		713.562	1293.15	0.760696	1.37857
1278.21	2002.83	1.00699	1.57786		1050.73	981.5	0.986898	0.921872		690.157	1653.2	0.735745	1.7624
1184.98	1907.29	0.93354	1.50259		1302.14	986.664	1.22304	0.926723		756.802	1549.51	0.806793	1.65186
1236.62	1779.67	0.974224	1.40204		1107.51	2077.74	1.04022	1.95151		670.731	1173.54	0.715036	1.25106
1242.67	1850.7	0.978991	1.458		3493.01	927.337	3.28081	0.870999		669.222	1226.71	0.713427	1.30774
1330.26	1402.91	1.04799	1.10523		706.315	839.574	0.663405	0.788569		513.133	1647.9	0.547028	1.75675
1133.58	1686.43	0.893048	1.32859		758.082	1149.16	0.712028	1.07934		512.515	1625.07	0.546369	1.73242
1152	1582.61	0.907557	1.2468		1016.27	1094.71	0.954529	1.0282		702.23	1287.89	0.748616	1.37296
1384.84	1755.78	1.091	1.38322		1622.65	788.236	1.52407	0.74035		688.205	1130.1	0.733664	1.20475
1386.73	1571.86	1.09249	1.23833		1658.83	772.585	1.55806	0.725649		794.192	830.939	0.846652	0.885826
1485.35	1747.06	1.17018	1.37636		2143.68	1171.87	2.01345	1.10068		956.239	826.945	1.0194	0.881568
1456.26	1697.14	1.14726	1.33703		1633.24	1180.67	1.53402	1.10894		1056.58	1300.26	1.12637	1.38615
1173.32	1551.88	0.924355	1.22259		1153.5	1081.13	1.08342	1.01545		1042.37	1232.27	1.11122	1.31367
1192.83	1893.65	0.939727	1.49184		1308.78	1208.27	1.22927	1.13487		1003.91	1571.07	1.07022	1.67485
1880.64	1777.89	1.48159	1.40065		1353.17	1295.4	1.27096	1.2167		807.521	1725.14	0.860862	1.8391
1358.81	1640.03	1.07049	1.29204		1182.51	1281.66	1.11067	1.2038		942.874	966.114	1.00516	1.02993
1301.42	1929.59	1.02528	1.52015		949.448	1084.74	0.891767	1.01884		970.793	999.868	1.03492	1.06591
1324.31	1765.25	1.04331	1.39069		671.832	983.332	0.631018	0.923593		794.536	1726.65	0.847019	1.8407
1291.08	1719.47	1.01713	1.35462		1000.57	974.645	0.939784	0.915434		880.342	1872.15	0.938493	1.99581
1306.7	1293.35	1.02943	1.01892		1344.55	1101.54	1.26286	1.03462		935.844	1670.69	0.997661	1.78104
1126.63	1379.65	0.887572	1.08691		1577.45	1139.7	1.48162	1.07046		861.131	1741.12	0.918012	1.85613
997.298	1746.19	0.785685	1.37567		2022.51	1138.96	1.89964	1.06977		828.032	1836.39	0.882727	1.95769
1078.77	1539.12	0.849866	1.21254		971.44	820.603	0.912423	0.77075		871.452	1684.38	0.929015	1.79564
794.044	1607.17	0.625559	1.26615		1110.36	1027.42	1.04291	0.965		875.036	1548.41	0.932836	1.65069
1019.25	1905.94	0.802978	1.50153		1230.76	1037.57	1.15599	0.974537		946.94	1437.7	1.00949	1.53266
1052.81	1571.58	0.829417	1.23811		1240.21	1168	1.16487	1.09704		731.957	1665.52	0.780306	1.77553
900.48	1683	0.70941	1.32589		982.721	1777.33	0.923019	1.66935		518.073	1195.09	0.552294	1.27403
853.791	1529.93	0.672628	1.2053		1313.28	1306.95	1.2335	1.22755		1036.34	1217.86	1.10479	1.2983
859.526	1544.5	0.677146	1.21678		1249.46	1167.93	1.17355	1.09698		1427.75	1255.91	1.52206	1.33887
905.787	1235.35	0.713591	0.973223		1155.1	738.072	1.08492	0.693233		1358.91	1246.11	1.44868	1.32842
1202.3	1310.53	0.947188	1.03245		1271.73	807.464	1.19447	0.758409		1280.19	1168.1	1.36475	1.24526
1193.21	1489.4	0.940023	1.17337		1151.53	1181.03	1.08157	1.10928		764.975	1305.98	0.815505	1.39224
882.832	1426.78	0.695506	1.12403		1278.16	1360.17	1.20051	1.27754		813.786	1889.28	0.86754	2.01408
945.339	1608.73	0.74475	1.26738		1066.48	1136.82	1.00169	1.06776		1117.81	1346.49	1.19165	1.43543
1006.23	1698.49	0.79272	1.33809		1184.76	1106.44	1.11278	1.03922		1109.77	1317.49	1.18308	1.40452
1349.01	1517.72	1.06277	1.19568		691.866	1402.29	0.649834	1.3171		1001.58	1149.68	1.06774	1.22562
1137.03	1409.86	0.895766	1.11071		735.305	849.708	0.690634	0.798087		1306.72	1174.88	1.39303	1.25249
1129.89	1329	0.89014	1.047		791.055	1204.28	0.742997	1.13112		1166.55	1368.74	1.2436	1.45915
1597.02	1314.19	1.25815	1.03534		772.787	1557.84	0.725839	1.4632		1448.58	1450.54	1.54426	1.54636
1469.37	1549.28	1.15759	1.22055		691.078	1130.31	0.649094	1.06165		897.062	932.475	0.956317	0.994069
1213.52	1652.92	0.956028	1.30219		666.293	1282.64	0.625815	1.20472		900.515	1590.58	0.959999	1.69565
1306.16	1496.39	1.02901	1.17888		1272	1552.08	1.19472	1.45779		799.688	1798.54	0.852511	1.91734
1453.54	1683.17	1.14512	1.32602		1735.57	1332.6	1.63013	1.25164		831.642	1894.96	0.886576	2.02013
1262.71	1786.47	0.994779	1.4074		1170.48	1325.88	1.09937	1.24533		1279.97	1139.65	1.36452	1.21493
2114.84	2077.77	1.6661	1.63689		1218.64	1310.49	1.1446	1.23088		1382.39	1135.92	1.4737	1.21095
1546.13	2297.17	1.21806	1.80974		679.041	1054.31	0.637788	0.990263		1113.64	1493.57	1.1872	1.59223
1189.77	2044.56	0.937316	1.61073		936.389	1628.87	0.879501	1.52992		1116.82	1541.56	1.19059	1.64338
1177.57	1198.2	0.927706	0.943959		689.989	1317.95	0.648071	1.23788		728.459	1541.97	0.776577	1.64382
1804.39	1308.85	1.42152	1.03113		815.725	1299.57	0.766168	1.22062		777.095	1586.31	0.828426	1.69109
1359.12	1350.78	1.07073	1.06417		940.145	1394.8	0.88303	1.31006		818.061	1286.13	0.872097	1.37109
1619.11	1517.43	1.27556	1.19545		863.518	1454.98	0.811058	1.36659		807.135	1225.32	0.86045	1.30626
1117.68	1587.76	0.880525	1.25086		861.269	1283.21	0.808946	1.20525		1038.25	1729	1.10684	1.84321
1187.34	1559.17	0.935399	1.22833		979.851	1315.9	0.920324	1.23596		1176.9	1629.99	1.25464	1.73766
1305.96	1458.59	1.02886	1.14909		888.856	610.443	0.834856	0.573357		834.915	1512.33	0.890065	1.61223
1178.72	1777.66	0.928614	1.40047		942.216	611.405	0.884975	0.574261		1216.9	1665.53	1.29729	1.77555
1018.26	1510.16	0.802195	1.18972		1030.97	1266.91	0.968336	1.18994		873.714	1614.53	0.931426	1.72118
1057.8	2651.23	0.833345	2.08868		1054.96	1386.79	0.990871	1.30254		1221.7	1906.91	1.3024	2.03287
1343.67	2928.25	1.05856	2.30692		1047.27	1355.94	0.983649	1.27357		840.567	1146.11	0.896091	1.22182
1284.76	1704.3	1.01215	1.34267		1127.02	1475.43	1.05855	1.38579		814.481	1113.6	0.868281	1.18716
801.103	1527.42	0.63112	1.20332		961.548	1193.81	0.903132	1.12129		865.624	1134.9	0.922802	1.20987
776.046	1786.45	0.611379	1.40739		1007.1	1168.98	0.945913	1.09796		620.646	1313.05	0.661643	1.39978
779.622	1613.1	0.614196	1.27082		909.787	1165.76	0.854516	1.09493		557.497	1312.25	0.594322	1.39893
1297.72	986.524	1.02236	0.777197		949.672	1874.71	0.891978	1.76082		1075.19	1270.12	1.14621	1.35402
1425.86	998.97	1.12331	0.787002		1071.28	2095.78	1.0062	1.96846		886.847	1499.96	0.945427	1.59904
1469.44	1059.2	1.15764	0.834452		976.839	1098.34	0.917495	1.03162		987.453	1450.13	1.05268	1.54591
1340.48	1093.7	1.05605	0.861628		1059.89	1068.13	0.995503	1.00324		884.578	762.107	0.943009	0.812448
1753.11	1896.85	1.38112	1.49436		1001.92	1303.77	0.941051	1.22456		886.747	1466	0.94532	1.56284
1552.77	1848.79	1.22329	1.4565		941.261	1145.36	0.884078	1.07577		1122.47	1492.62	1.19662	1.59121
1643.83	2264.38	1.29503	1.78391		1038.24	1447.14	0.975166	1.35923		876.706	1176.57	0.934616	1.25428
1626.8	1942.15	1.28161	1.53005		1052.44	1093.04	0.988499	1.02664		733.429	1621.03	0.781875	1.7281
917.121	1872.87	0.72252	1.47547		940.503	1121.14	0.883366	1.05303		710.867	1537.5	0.757823	1.63906
944.573	1359.9	0.744147	1.07134		1015.91	1103.37	0.954193	1.03634		992.287	1676.61	1.05783	1.78736
1113.14	1332.49	0.876945	1.04975		1066.9	1213.79	1.00208	1.14005		965.994	1370.9	1.0298	1.46145
1365.23	1369.54	1.07555	1.07894		887.956	1182.35	0.834011	1.11052		1018.87	1285.16	1.08618	1.37006
1388.62	1326.97	1.09398	1.0454		756.757	1051.66	0.710783	0.98777		880.465	1199	0.938624	1.2782
1501.51	1557.19	1.18291	1.22677		793.883	1030.43	0.745653	0.967828		1085.89	1176	1.15762	1.25368
1181.51	1575.31	0.930809	1.24105		978.824	963.923	0.919359	0.905363		1007.17	1486.36	1.0737	1.58454
921.94	1522.15	0.726317	1.19917		865.299	1101.28	0.812731	1.03438		1134.41	1648.87	1.20934	1.75778
1069.1	1389.5	0.842251	1.09466		857.372	976.467	0.805285	0.917145		1202.37	1360.87	1.28179	1.45077
1139.09	949.576	0.897394	0.748088		801.639	2159.87	0.752938	2.02866		1138.13	1337.67	1.2133	1.42603
1082.61	962.836	0.852893	0.758535		908.178	2289.59	0.853005	2.15049		974.717	1533.5	1.0391	1.63479
1021.44	1449.37	0.804706	1.14183		1065	1104.82	1.0003	1.0377		877.261	1619.57	0.935208	1.72655
1197.28	1377.9	0.943231	1.08553		1044.45	1513.79	0.980997	1.42182		963.138	1481.51	1.02676	1.57937
1070.99	1355.57	0.843743	1.06794		1126.32	1702.7	1.0579	1.59926		840.779	1534.71	0.896317	1.63609
992.946	1357.57	0.782256	1.06951		938.75	1336.14	0.881719	1.25497		1050.23	1543.77	1.1196	1.64575
1146.96	1023.99	0.903591	0.806711		1102.81	568.916	1.03582	0.534353		864.116	1568.97	0.921195	1.67261
1041.12	1059.31	0.820205	0.834541		890.258	573.917	0.836174	0.539051		873.677	906.432	0.931387	0.966306
938.134	1088.3	0.739075	0.857376		781.597	592.433	0.734114	0.556442		973.884	895.069	1.03821	0.954192
1014.24	1078.61	0.799032	0.849747		1004.26	1107.05	0.943252	1.0398		1049.51	1214.3	1.11884	1.29451
1293.34	993.368	1.01891	0.782589		1048.41	1287.05	0.984715	1.20886		985.049	1169.86	1.05012	1.24713
1309.64	1321.45	1.03175	1.04105		1075.52	1522.1	1.01018	1.42963		1014.08	1168.85	1.08106	1.24606
1267.14	1421.99	0.998273	1.12027		900.026	1615.61	0.845348	1.51746		1133.34	1278.05	1.2082	1.36248
1268.43	1370.12	0.999286	1.0794		938.895	1144.97	0.881856	1.07541		1106.12	1586.71	1.17919	1.69152
1238.13	1468.95	0.975413	1.15726		903.33	1031.58	0.848451	0.968913		1221.62	1774.99	1.30232	1.89224
1263.13	1594.34	0.995114	1.25604		967.978	861.697	0.909172	0.809348		977.421	1323.65	1.04198	1.41108
1497.6	1596.65	1.17983	1.25786		643.736	960.181	0.604628	0.901848		889.395	1256.89	0.948144	1.33991
1239.69	1607.55	0.976641	1.26645		660.428	649.592	0.620306	0.610128		827.191	909.523	0.881831	0.969602
1133.99	1605.64	0.893371	1.26495		890.526	746.257	0.836425	0.70092		1236.44	886.804	1.31811	0.945382
1036.67	1483.95	0.816701	1.16907		773.546	1044.15	0.726552	0.980719		881.299	1663.03	0.939513	1.77288
1495.08	1551.76	1.17784	1.2225		807.956	1063.2	0.758872	0.998609		741.023	1312.31	0.789971	1.399
1078.52	1436.52	0.849676	1.13171		849.202	934.575	0.797612	0.877798		1198.7	1405.49	1.27788	1.49833
1059.88	1794.57	0.834986	1.41378		781.716	1055.18	0.734225	0.991075		868.246	1010.54	0.925597	1.07729
1718.82	1249.44	1.35411	0.984328		913.81	1465.97	0.858295	1.37691		1051.75	1064.86	1.12122	1.1352
1366.04	1559.08	1.07619	1.22827		1033.85	1468.3	0.971041	1.3791		885.583	1465.95	0.94408	1.56278
1117.88	1429.12	0.880679	1.12588		1073.35	1002.45	1.00814	0.941546		1289.7	1538.28	1.37489	1.63989
1387.51	1456.26	1.0931	1.14726		861.191	744.454	0.808872	0.699227		1254.21	1630.06	1.33706	1.73773
858.02	1290.81	0.67596	1.01692		924.813	676.072	0.868629	0.635		860.361	809.802	0.917192	0.863293
1004.94	1291.46	0.791708	1.01743		1243.47	945.238	1.16792	0.887813		939.996	788.913	1.00209	0.841024
1080.99	1279.76	0.851617	1.00821		1051.61	1188.54	0.987724	1.11634		865.966	1391.49	0.923167	1.48341
1044.99	987.332	0.823256	0.777833		970.571	805.973	0.911608	0.757008		1021.27	1513.9	1.08873	1.6139
977.585	1054.57	0.770154	0.8308		1008.6	773.606	0.947325	0.726608		663.212	1357.01	0.707021	1.44665
1001		0.788601			815.318	881.946	0.765786	0.828366		699.778	1685.82	0.746001	1.79717
1943.49		1.53111			889.413	917.624	0.835379	0.861877		1117.55	1069.96	1.19137	1.14064
1635.84		1.28874			963.287	902.586	0.904765	0.847752		1251.85	1111.66	1.33454	1.18509
1190.71		0.938058			816.455	1206.37	0.766854	1.13308		929.136	1542.81	0.990509	1.64472
1680.99		1.32431			936.42	1340.96	0.879531	1.2595		888.839	1659.13	0.94755	1.76872
1259.44		0.992205			890.4	1258.96	0.836307	1.18248		886.4	1908.59	0.944951	2.03466
1110.05		0.874516			893.689	1338.15	0.839396	1.25685		975.848	1907.38	1.04031	2.03337
1277.07		1.0061			1220.35	1199.67	1.14621	1.12679		729.896	1641.81	0.778109	1.75026
1188.19		0.936069			1519.82	1385.03	1.42749	1.30089		808.597	1720.21	0.862008	1.83383
931.361		0.733739			1432.41	1377.33	1.34539	1.29365		728.115	1514.74	0.77621	1.6148
835.354		0.658103			810.237	847.278	0.761014	0.795805		993.402	1621.24	1.05902	1.72834
1127.58		0.888324			886.158	1282.9	0.832322	1.20496		1011.26	1531.15	1.07806	1.63229
1250.16		0.984896			1140.28	1672.92	1.071	1.57128		1088.14	1304.29	1.16002	1.39044
1126.35		0.887354			778.209	1382.51	0.730932	1.29852		975.444	1336.34	1.03988	1.42462
1100.74		0.867177			777.394	1602.67	0.730166	1.5053		858.419	1382.81	0.915121	1.47415
1158.62		0.912777			666.522	1388.2	0.62603	1.30387		830.935	1499.03	0.885822	1.59804
1082.47		0.852784			703.361	1478.13	0.66063	1.38833		885.639	1194.78	0.944139	1.2737
908.816		0.715977			835.476	936.778	0.784719	0.879867		1143.38	1246.94	1.2189	1.3293
1008.42		0.794446			921.609	992.604	0.86562	0.932302		1138.28	1105.64	1.21347	1.17867
1278.67		1.00736			920.133	1147.47	0.864233	1.07776		896.091	1031.31	0.955282	1.09943
1937.99		1.52678			1005.85	1310.41	0.944742	1.2308		936.662	1191.98	0.998533	1.27072
1857.6		1.46344			839.181	1014.97	0.788199	0.953312		988.01	1159.37	1.05327	1.23595
1202.26		0.947158			1417.86	1005.21	1.33172	0.944145		896.525	1364.83	0.955745	1.45498
1325.04		1.04388			993.627	541.156	0.933262	0.50828		939.265	1196.35	1.00131	1.27538
1145.06		0.902096			1015.46	543.058	0.953767	0.510067		821.874	1286.56	0.876162	1.37154
1300.18		1.0243			931.366	1585.93	0.874784	1.48958		1069.79	1454.61	1.14045	1.5507
1329.17		1.04714			687.374	1559.02	0.645615	1.46431		1528.8	1464.52	1.62978	1.56125
1013.06		0.798098			718.005	2057.8	0.674385	1.93278		1586.15	1039.71	1.69092	1.10839
970.093		0.764252			845.955	2586.39	0.794562	2.42926		1470.22	1184.91	1.56733	1.26318
1008.55		0.794547			894.527	1331.9	0.840183	1.25098		1427.42	1217.36	1.52171	1.29777
1392.86		1.09731			883.197	2475.31	0.829541	2.32493		1083.3	1306.08	1.15486	1.39236
1368.93		1.07846			1027.93	1363.52	0.965481	1.28069		996.389	1143.88	1.06221	1.21944
605.626		0.477121			1062.53	515.957	0.997976	0.484612		941.494	1157.53	1.00368	1.23399
1693.95		1.33452			1011.72	1834.8	0.950258	1.72333		1115.11	1359.74	1.18877	1.44955
1584.46		1.24826			730.908	2096.44	0.686504	1.96907		1159.56	1088	1.23616	1.15987
1244.03		0.980065			825.596	1797.12	0.77544	1.68794		1017.55	1001.17	1.08476	1.0673
1532.39		1.20724			847.749	2039.31	0.796246	1.91542		1131.35	1691.09	1.20608	1.80279
1115.92		0.879134			914.736	2602.95	0.859165	2.44482		1298.32	1746.82	1.38409	1.86221
1193.76		0.940458			493.267	2871.79	0.4633	2.69732		989.803	1236.51	1.05518	1.31818
1195.7		0.941986			514.736	1681.75	0.483465	1.57958		1139.22	1312.14	1.21447	1.39881
1202.86		0.94763			1135.61	1925.8	1.06662	1.80881		1295.59	985.384	1.38117	1.05047
1206.6		0.950579			1113.66	1762.71	1.046	1.65562		1116.82	1092.62	1.19059	1.16479
1464.59		1.15383			847.266	1043.5	0.795793	0.980103		1161.93	1274.67	1.23868	1.35887
1771.32		1.39547			1040.32	970.274	0.977115	0.911328		959.522	1369.71	1.0229	1.46018
1622.49		1.27822			1392.16	1284.02	1.30759	1.20602		799.415	1438.54	0.85222	1.53356
1396.06		1.09983			1134.15	1280.4	1.06524	1.20261		975.241	1294.57	1.03966	1.38008
1451.76		1.14372			1417.78	1066.83	1.33164	1.00201		630.308	1158.76	0.671943	1.23531
868.541		0.684248			1161.66	1159.11	1.09108	1.08869		707.89	1041.66	0.754649	1.11046
957.378		0.754235			944.193	1369.39	0.886832	1.28619		948.644	1016.05	1.01131	1.08317
1117.47		0.880356			1039.89	1246.97	0.976717	1.17122		1651.77	1220.44	1.76088	1.30106
1305.28		1.02832			1167.8	1197.32	1.09685	1.12458		1061.23	1223.42	1.13133	1.30424
1280.01		1.00841			1207.68	1102.14	1.13432	1.03518		1491.42	1289.88	1.58993	1.37508
1280.66		1.00892			1208.38	977.739	1.13497	0.91834		1322.3	1213.81	1.40964	1.29399
1318.69		1.03888			1008.3	989.177	0.947043	0.929083		1248.54	1263.21	1.33101	1.34665
1247.91		0.983124			586.57	1119.84	0.550935	1.05181		774.379	1246.23	0.825531	1.32855
1336.02		1.05253			814.092	1090.87	0.764635	1.0246		758.7	1002.22	0.808816	1.06842
1359.68		1.07117			1069.51	1076.09	1.00454	1.01072		821.859	1005.93	0.876146	1.07238
1232.64		0.971094			2735.42	1076.42	2.56924	1.01103		802.93	1289.3	0.855967	1.37446
1439.83		1.13432			1022.88	1304	0.96074	1.22478		752.045	1161.37	0.801721	1.23808
962.448		0.758229			674.478	1289.4	0.633502	1.21107		993.618	1114.09	1.05925	1.18768
1148.3		0.904648			1159.82	1326.22	1.08936	1.24565		1027.85	1188.6	1.09574	1.26711
869.333		0.684872			1017.99	1493.72	0.956145	1.40298		1088.83	1225.53	1.16075	1.30648
1242.09		0.978538			1137.87	1642.54	1.06874	1.54275		1374.11	1329.16	1.46488	1.41696
1332.41		1.04969			1135.7	1240.12	1.0667	1.16478		1028.63	1964.24	1.09658	2.09399
1270.37		1.00081			942.907	1794.47	0.885623	1.68545		1159.38	1873.76	1.23596	1.99753
1487.16		1.1716			946.386	851.775	0.888891	0.800028		1224.77	2108.77	1.30567	2.24806
1406.96		1.10842			1285.47	762.933	1.20738	0.716584		1088.94	1607.63	1.16087	1.71383
1425.98		1.12341			1193.59	918.858	1.12107	0.863036		1692.17	1477.89	1.80395	1.57551
1475.8		1.16266			1055.76	1007.92	0.991618	0.946687		1235.13	1222.66	1.31672	1.30342
1451.05		1.14316			999.009	1145.78	0.938318	1.07617		1927.03	1274.69	2.05432	1.35889
1208.34		0.951944			1099.01	853.151	1.03225	0.801321		1217.05	2338.62	1.29744	2.4931
1186.21		0.934513			1073.97	868.358	1.00872	0.815604		1403.86	1624.03	1.49659	1.73131
748.062		0.589333			1099.58	1450.62	1.03278	1.36249		1266.93	1403.79	1.35062	1.49652
751.568		0.592095			954.771	1434.65	0.896767	1.34749		1169.36	1947.77	1.2466	2.07643
912.864		0.719166			918.768	1279.83	0.862951	1.20208		893.225	1484.4	0.952226	1.58245
954.116		0.751665			1047.26	1235.63	0.983641	1.16057		1332.34	992.599	1.42035	1.05817
1235.68		0.973483			1301.68	1189.07	1.2226	1.11684		1337.21	1318.91	1.42554	1.40603
1285.5		1.01273			1067.13	1461.63	1.0023	1.37284		967.402	1346.15	1.0313	1.43507
1249.69		0.984519			809.624	1352.87	0.760438	1.27068		1004.22	1340.14	1.07055	1.42866
1356.99		1.06906			808.975	1251.37	0.759829	1.17535		642.954	1426.34	0.685424	1.52056
1610.24		1.26857			832.472	1081.36	0.781898	1.01566		693.384	1429.16	0.739185	1.52356
1465.24		1.15433			1069.13	1049.16	1.00418	0.985419		759.627	1769.04	0.809804	1.88589
1320.26		1.04012			1284.15	886.645	1.20614	0.83278		751.682	1602.44	0.801334	1.70828
1322.25		1.04169			1061.6	1273.13	0.997111	1.19578		960.592	972.323	1.02404	1.03655
1356.16		1.0684			1070.73	1158.74	1.00568	1.08834		1002.73	1471.06	1.06897	1.56823
1272.37		1.00239			1134.38	1001.7	1.06547	0.940841		877.176	1529.15	0.935118	1.63016
923.307		0.727394			709.429	1076.5	0.66633	1.0111		874.809	1034.6	0.932595	1.10294
1186.68		0.934879			753.388	997.676	0.707618	0.937065		868.406	1042.7	0.925769	1.11158
1011.69		0.797021			575.932	1055.96	0.540943	0.991807		970.216	1614.5	1.0343	1.72115
1136.93		0.895689			1246.87	1366.64	1.17112	1.28361		976.841	1964.82	1.04137	2.09461
1277.77		1.00665			1373.7	1038.84	1.29024	0.975728		895.672	1204.64	0.954836	1.28421
1027.26		0.809291			1316.42	1427.63	1.23645	1.3409		1093.01	1247.5	1.16521	1.3299
1246.99		0.982393			1384.29	1083.25	1.30019	1.01744		1034.03	1642.52	1.10234	1.75102
1492.21		1.17558			947.413	991.73	0.889856	0.931481		985.721	1677.18	1.05083	1.78796
1109.26		0.873893			1033.75	1070.41	0.970949	1.00538		1068.1	1775.65	1.13865	1.89294
1121.66		0.883657			970.211	962.173	0.911269	0.903719		1160.38	1689.83	1.23703	1.80145
1095.95		0.863407			1069.14	1063.81	1.00419	0.999183		1249.48	1561.96	1.33202	1.66513
1082.28		0.852633			1053.11	1157.85	0.98913	1.08751		991.135	1689.43	1.0566	1.80103
1119.8		0.882197			975.434	1242.47	0.916175	1.16699		1013.52	1644.74	1.08047	1.75338
1128.4		0.888967			1001.53	847.23	0.940685	0.795759		1558.57	1983.73	1.66152	2.11477
991.268		0.780934			948.59	900.702	0.890961	0.845983		1212.47	2206.75	1.29256	2.35252
1034.4		0.814913			912.596	1113.67	0.857154	1.04601		1100.35	2000.49	1.17304	2.13263
973.368		0.766832			772.272	1127.11	0.725355	1.05864		1210.81	1950.83	1.29079	2.07969
876.518		0.690532			728.591	1215.05	0.684328	1.14123		1094.12	1959.14	1.16639	2.08856
900.508		0.709432			1385.65	1222.47	1.30146	1.1482		565.901	1748.83	0.603282	1.86435
700.022		0.551486			1483.31	1123.24	1.3932	1.055		453.382	1819.55	0.48333	1.93974
716.283		0.564297			1112.92	1166.09	1.04531	1.09525		784.695	1557.11	0.836528	1.65996
904.707		0.71274			1206.38	1266.43	1.13309	1.1895		803.495	1969.31	0.85657	2.09939
936.619		0.737881			1024.18	1870.55	0.961958	1.75691		954.879	1947.07	1.01795	2.07568
951.945		0.749955			1049.14	1130.74	0.985406	1.06204		853.266	1192.9	0.909628	1.27169
1085.83		0.85543			832.104	882.529	0.781552	0.828914		995.186	1215.29	1.06092	1.29557
843.856		0.664801			895	999.488	0.840627	0.938768		730.242	1183.41	0.778478	1.26158
1029.54		0.811089			828.094	816.183	0.777786	0.766599		820.915	1643.08	0.87514	1.75162
1402.85		1.10518			801.876	852.252	0.75316	0.800477		1069.34	1754.61	1.13998	1.87051
927.217		0.730474			759.975	1223.61	0.713805	1.14927		835.194	1360.52	0.890362	1.45039
879.383		0.692789			774.135	1214.8	0.727105	1.141		1087.74	1348.05	1.15959	1.43709
1029.74		0.811239			791.3	1000.7	0.743227	0.93991		842.178	1784.13	0.897808	1.90198
1403.88		1.106			945.01	870.859	0.8876	0.817953		800.539	1724.34	0.853418	1.83824
1456.04		1.14709			945.719	1139.52	0.888265	1.0703		1310.83	1751.44	1.39742	1.86713
1039.51		0.818936			778.661	1141	0.731356	1.07169		765.756	1686.44	0.816338	1.79784
1060.54		0.835511			824.533	1334.7	0.774442	1.25361		765.352	1919.49	0.815907	2.04628
968.605		0.76308			847.216	1085.24	0.795746	1.01931		631.268	2023.2	0.672966	2.15684
940.268		0.740756			1218.37	1202.66	1.14435	1.12959		611.084	1757.89	0.651449	1.87401
961.976		0.757857			980.639	1362.07	0.921064	1.27932		1144.85	1693.37	1.22048	1.80523
627.616		0.494445			974.859	1166.58	0.915635	1.09571		1303.14	1715.78	1.38922	1.82912
909.651		0.716635			1042.93	1326.11	0.979572	1.24555		2433.44	1404.28	2.59418	1.49704
968.25		0.7628			1168.95	874.609	1.09793	0.821475		1692.13	1510.48	1.8039	1.61025
823.891		0.649073			1361.38	972.613	1.27868	0.913525		812.064	1737.19	0.865705	1.85194
965.955		0.760992			595.574	660.445	0.559392	0.620322		803.351	1154.05	0.856417	1.23028
1365.63		1.07586			775.806	747.802	0.728675	0.702372		702.66	1358.46	0.749074	1.44819
1015.94		0.800368			839.966	738.256	0.788937	0.693406		744.089	1115.57	0.79324	1.18926
1102.41		0.868495			1066.36	809.274	1.00158	0.760109		941.265	1278.5	1.00344	1.36295
1305.5		1.02849			980.322	1209.36	0.920766	1.13588		921.641	1389.98	0.98252	1.4818
1218.77		0.960163			1183.02	1315.11	1.11115	1.23521		883.353	1437.07	0.941703	1.53199
1342.91		1.05796			1201.9	912.13	1.12888	0.856716		788.376	1802.39	0.840452	1.92145
1387.62		1.09318			1018.36	980.256	0.956491	0.920704		826.845	1667.71	0.881462	1.77788
1294.17		1.01956			1089.44	1211.04	1.02325	1.13746		830.058	1787.67	0.884887	1.90575
1326.84		1.0453			914.097	1420.39	0.858564	1.3341		956.837	1713.89	1.02004	1.8271
1194.2		0.940804			991.091	1243.63	0.93088	1.16807		1311.42	1650.95	1.39804	1.76
1065.26		0.839226			847.565	1288.07	0.796074	1.20982		581.479	1676.48	0.619888	1.78722
2304.03		1.81514			812.614	1247.2	0.763247	1.17143		601.278	1483.45	0.640995	1.58144
1257.71		0.990841			1753.19	1313.17	1.64668	1.2334		723.177	1613.08	0.770946	1.71963
859.155		0.676854			1933.41	821.811	1.81595	0.771885		738.122	2229.3	0.786878	2.37656
956.954		0.753901			1485.55	769.655	1.3953	0.722897		865.301	1874.74	0.922458	1.99857
1294.64		1.01994			1016.13	875.132	0.954401	0.821967		854.009	2013.04	0.91042	2.14601
1290.06		1.01633			1084.19	1167.99	1.01833	1.09704		458.873	1961.9	0.489183	2.09149
1049.53		0.82683			947.473	1051.37	0.889913	0.987495		452.943	1504.3	0.482863	1.60367
1118.17		0.880906			1042.55	495.905	0.979209	0.465778		757.836	1572.23	0.807894	1.67608
1302.13		1.02583			955.819	1019.73	0.897751	0.957778		836.425	1591.79	0.891674	1.69694
1417.83		1.11699			981.61	598.339	0.921976	0.561989		1066.1	1503.66	1.13652	1.60298
1344.17		1.05896			861.163	945.614	0.808845	0.888166		1014.6	1567.6	1.08162	1.67114
1732.58		1.36495			867.972	1050.84	0.815241	0.987004		1152.43	1156.52	1.22855	1.23292
1543.26		1.2158			968.64	670.683	0.909793	0.629938		1286.86	1279.06	1.37186	1.36355
1512.1		1.19125			1109.6	1063.9	1.04219	0.999267		838.629	1639.13	0.894024	1.7474
1032.77		0.81363			1042.06	1092.45	0.978757	1.02609		980.151	1761.99	1.04489	1.87838
1057.36		0.833004			1268.42	1304.31	1.19136	1.22507		1085.47	2034.29	1.15717	2.16867
1245.87		0.981515			1150.57	892.799	1.08067	0.83856		945.259	2345.93	1.0077	2.50088
1135.31		0.894408			992.5	1277.8	0.932204	1.20018		1016.75	2367.59	1.08391	2.52398
1041.37		0.820406			890.225	558.681	0.836143	0.52474		1319.46	1874.68	1.40661	1.99851
1143.7		0.901021			1354.19	980.098	1.27192	0.920555		1347.82	1653.44	1.43685	1.76266
1152.38		0.90786			1278.09	555.062	1.20045	0.521341		1435.82	2577.65	1.53066	2.74792
1037.55		0.817399			1221.53	815.669	1.14732	0.766116		927.06	2021.94	0.988297	2.1555
1039.27		0.818749			1710.6	1052.02	1.60668	0.988104		1016.71	1843.1	1.08387	1.96484
1038.45		0.818101			1509.96	884.416	1.41823	0.830686		1338.65	1813.82	1.42708	1.93363
1038.92		0.818471			972.316	1843.22	0.913246	1.73124		849.262	1518.09	0.90536	1.61837
1005.05		0.791796			1105.07	1706.31	1.03794	1.60265		761.4	1607.83	0.811694	1.71404
1061.51		0.836269			1100.14	1163.8	1.03331	1.0931		1039.13	2007.11	1.10777	2.13969
1276.23		1.00543			1133.27	1080.55	1.06442	1.01491		1102.92	1941.77	1.17577	2.07004
1098.77		0.865625			1238.91	1198.26	1.16365	1.12547		659.466	1692.98	0.703026	1.80481
1121.03		0.883163			1212.05	1495.4	1.13842	1.40455		856.371	1805.16	0.912939	1.9244
1043.92		0.822411			1048.33	1349.74	0.984642	1.26774		958.877	1577.95	1.02222	1.68218
1114.18		0.877763			1085.58	895.236	1.01963	0.840849		793.905	1872.89	0.846346	1.9966
943.796		0.743535			973.275	1524.95	0.914147	1.43231		806.124	2112.14	0.859373	2.25165
987.868		0.778255			1049.68	1306.87	0.985915	1.22748		642.987	1335.66	0.68546	1.42388
1053.42		0.829898			925.177	1775.71	0.868971	1.66783		625.305	1351.24	0.66661	1.44049
1042.24		0.821092			906.119	1084.14	0.85107	1.01828		979.581	1621	1.04429	1.72808
1094.94		0.862611			1033.46	1926.29	0.970679	1.80927		1000.37	1595.6	1.06645	1.701
1112.75		0.876638			1126.18	1365.56	1.05777	1.2826		766.343	1204.24	0.816964	1.28379
1131.85		0.891687			3874.79	1249.6	3.63939	1.17369		782.785	1152.67	0.834491	1.22881
1118.06		0.880822			1825.89	1632.55	1.71497	1.53337		910.691	1182.94	0.970846	1.26107
1017.4		0.801525			914.19	1549.86	0.858651	1.45571		1021.73	1225.15	1.08922	1.30608
1286.48		1.0135			932.07	1221.04	0.875445	1.14686		539.907	1651.89	0.57557	1.76101
1171.48		0.922905			629.162	1243.93	0.590939	1.16836		537.309	1631.02	0.5728	1.73875
1352.22		1.06529			953.532	1271.41	0.895603	1.19417		916.134	1732.27	0.976649	1.84669
1270.25		1.00072			3825.23	1170.8	3.59285	1.09967		1034.86	1748.14	1.10322	1.86362
964.114		0.759542			1298.26	1105.18	1.21939	1.03803		1057.15	1674.24	1.12698	1.78483
903.854		0.712068			1296.61	1225.39	1.21784	1.15094		1158.05	1660.47	1.23454	1.77015
990.271		0.780149			1064.91	1184.06	1.00022	1.11213		728.5	1570.16	0.776621	1.67387
1026.03		0.808322			1205.17	1319.63	1.13195	1.23946		956.83	1576.28	1.02003	1.6804
1097.81		0.864865			1290.67	1156.23	1.21226	1.08599		850.131	1724.93	0.906287	1.83887
1204		0.948531			706.636	1293.92	0.663707	1.21532		952.398	1698.41	1.01531	1.81059
954.966		0.752335			1072.55	1055.31	1.00739	0.991196		791.378	1400.24	0.843652	1.49274
1039.59		0.819006			964.404	1508.66	0.905815	1.41701		933.169	1310.83	0.99481	1.39742
1009.87		0.79559			1337.03	1175.1	1.2558	1.10371		952.612	1439.49	1.01554	1.53458
1182.78		0.931811			1335.45	971.426	1.25432	0.912411		853.566	1540.55	0.909948	1.64231
1192.08		0.939137			996.888	1379.49	0.936326	1.29568		911.675	1542.42	0.971895	1.6443
921.889		0.726277			1289.25	1014.2	1.21093	0.95259		1099.06	1411.31	1.17166	1.50454
1002.72		0.789954			1321.74	989.95	1.24144	0.929809		1023.75	1519.86	1.09137	1.62026
1091.22		0.859678			1119.52	1090.12	1.05151	1.02389		2164.59	1558.97	2.30757	1.66195
1221.19		0.962068			1088.84	1031.01	1.02269	0.968377		1431.6	1310.67	1.52616	1.39725
1365.31		1.07561			897.435	1189.94	0.842915	1.11765		1323.9	1344.2	1.41135	1.43299
1431.18		1.1275			970.629	1181.55	0.911662	1.10977		782.828	1398.77	0.834537	1.49117
1403.77		1.10591			1039.03	1543.05	0.975911	1.4493		891.524	1465.85	0.950414	1.56268
1203.29		0.947965			976.623	1032.8	0.917291	0.970055		1136.69	1856	1.21177	1.97859
1879.26		1.4805			1097.59	1043.39	1.03091	0.980004		945.965	1735.3	1.00845	1.84993
1235.41		0.973274			1086.79	1038.81	1.02077	0.975699		903.609	1571.45	0.963297	1.67525
895.281		0.705314			1282.17	1081.39	1.20427	1.0157		1091.81	1754.35	1.16393	1.87024
1263.01		0.995012			990.411	1637.1	0.930242	1.53764		688.785	1492.73	0.734283	1.59133
1261.68		0.993968			1058.44	1361.97	0.994136	1.27923		954.721	1553.51	1.01778	1.65613
1139.07		0.897375			940.797	1523.8	0.883642	1.43122		910.966	1369.22	0.971139	1.45966
1061.8		0.8365			998.457	776.884	0.937799	0.729687		798.218	1501.39	0.850944	1.60056
1131.8		0.891649			848.204	891.44	0.796674	0.837283		1266.04	1653.04	1.34966	1.76223
837.75		0.659991			1326.22	1526.9	1.24565	1.43414		1471.49	1566.67	1.56868	1.67015
864.548		0.681102			905.73	931.968	0.850705	0.875349		812.943	1905.51	0.866642	2.03138
924.318		0.72819			1237.37	1057.36	1.1622	0.993127		1004.88	1811.16	1.07126	1.9308
907.94		0.715287			952.033	2175.26	0.894196	2.04311		1003.75	1445.96	1.07006	1.54147
994.781		0.783702			970.614	2701.29	0.911647	2.53719		872.483	1655.45	0.930114	1.7648
1207.24		0.951079			988.161	1109.55	0.928129	1.04214		1479.19	1587.71	1.5769	1.69259
1219.01		0.960353			1035.88	1295.42	0.972949	1.21672		974.568	1610.52	1.03894	1.71691
1677.87		1.32185			994.799	1284.67	0.934363	1.20662		954.236	2184.49	1.01727	2.32878
1030.54		0.811876			1100.61	1460.73	1.03374	1.37199		874.292	1296.73	0.932043	1.38239
1026.06		0.808343			1035.81	1370.59	0.972883	1.28733		1006.83	1339.22	1.07333	1.42768
982.38		0.773932			1053.17	1306.64	0.989187	1.22726		1366.91	1498.27	1.4572	1.59724
1037.42		0.817292			1205.44	1530.51	1.13221	1.43753		1503.39	1484.14	1.60269	1.58217
1003.48		0.790555			843.829	1415.04	0.792565	1.32908		1443.35	1807.13	1.53869	1.9265
1224.27		0.964498			892.676	1279.1	0.838445	1.2014		1313.2	1778.96	1.39995	1.89647
1307.26		1.02987			921.225	1425.36	0.865259	1.33877		984.129	1384.05	1.04913	1.47547
1396.19		1.09994			991.299	704.434	0.931076	0.661639		1009.16	1467.34	1.07581	1.56427
1502.93		1.18403			813.855	1304.31	0.764412	1.22507		804.955	1581.59	0.858126	1.68606
1519.27		1.1969			808.297	1372.19	0.759192	1.28883		1005.6	1399.96	1.07203	1.49244
1654.38		1.30335			975.169	1439.63	0.915926	1.35217		926.981	1495.22	0.988212	1.59398
1622.6		1.27831			1024.04	951.418	0.961832	0.893618		1109.11	1596.68	1.18237	1.70215
1170.06		0.921786			994.812	845.357	0.934376	0.794		1161.73	1498.52	1.23847	1.5975
640.046		0.504237			977.609	937.571	0.918218	0.880612		903.203	1619.69	0.962864	1.72667
1069.85		0.842839			1216.2	1148.54	1.14231	1.07876		977.627	1347.34	1.0422	1.43634
1204.32		0.948777			1351.25	1194.11	1.26916	1.12157		1079.03	1399.96	1.15031	1.49243
1174.56		0.925331			2507.16	1391.38	2.35485	1.30685		1083.66	1410.15	1.15525	1.5033
1226.28		0.966077			2846.97	1115.85	2.67401	1.04806		1043.63	1401.61	1.11257	1.49419
1316.44		1.03711			943.25	1038.12	0.885946	0.975053		1119.82	1419.85	1.19379	1.51363
1320.31		1.04016			1093.18	1582.18	1.02677	1.48606		942.048	1263.57	1.00428	1.34704
1450.39		1.14264			923.082	947.221	0.867003	0.889675		1000.57	1356.73	1.06667	1.44635
1103.02		0.868975			940.678	1055.48	0.88353	0.991361		674.614	1106.91	0.719175	1.18003
1401.21		1.10389			1223.34	756.898	1.14902	0.710915		921.429	1132.81	0.982293	1.20764
1270.33		1.00078			1376.86	653.927	1.29321	0.6142		740.667	1388.14	0.789591	1.47983
1586.31		1.24971			1238.45	1318.19	1.16322	1.2381		782.503	1459.08	0.83419	1.55546
2111.41		1.6634			961.66	1560.99	0.903238	1.46616		565.629		0.602992
1753.18		1.38118			991.873	1597.72	0.931615	1.50066		560.815		0.597859
2024.21		1.5947			956.365	1631.44	0.898265	1.53233		749.908		0.799443
1274.91		1.00439			1050.77	1663.19	0.986935	1.56215		846.335		0.902239
1410.5		1.11121			971.776	879.529	0.912739	0.826096		783		0.834721
1284.88		1.01225			932.847	835.683	0.876175	0.784913		724.242		0.772081
1366.33		1.07641			1079.9	891.596	1.01429	0.83743		1007.88		1.07445
1435.31		1.13076			1069.06	3918.96	1.00412	3.68088		999.329		1.06534
1445.93		1.13912			1272.57	1759.72	1.19526	1.65282		902.646		0.96227
1061.5		0.836261			1219.28	1755.23	1.14521	1.6486		595.778		0.635132
1086.28		0.855782			1007.8	1797.1	0.946577	1.68792		589.106		0.628019
1117.38		0.880285			991.609	1561.97	0.931367	1.46707		909.156		0.96921
1137.72		0.896315			1388.37	1051.69	1.30402	0.9878		1013.63		1.08058
859.525		0.677145			967.972	1168.54	0.909166	1.09755		1084.77		1.15642
924.745		0.728526			1505.39	3681.11	1.41393	3.45747		1258.02		1.34111
973.59		0.767007			1128.2	3893.44	1.05966	3.65691		917.828		0.978455
1062.53		0.837078			1150.15	1001.38	1.08028	0.940545		1134.9		1.20987
1018.56		0.802438			1077.41	1084.23	1.01196	1.01836		1334.01		1.42213
1125.78		0.886903			1257.68	737.633	1.18127	0.69282		1250.72		1.33334
1089.63		0.858429			1047.87	912.463	0.984211	0.85703		1187.36		1.26579
1159.96		0.913832			1139.57	1068.05	1.07034	1.00316		1270.44		1.35436
1295.9		1.02093			1115.44	1052.24	1.04767	0.988318		581.953		0.620394
1634.49		1.28768			1059.3	967.938	0.994942	0.909134		597.569		0.637041
1151.7		0.907322			943.567	996.575	0.886244	0.936031		590.439		0.629441
1058.61		0.833987			940.36	1850.11	0.883232	1.73771		576.028		0.614077
1080.09		0.850907			618.243	1356.94	0.580683	1.27451		586.568		0.625313
919.375		0.724296			967.681	2034.86	0.908893	1.91124		739.442		0.788286
897.779		0.707282			957.126	1392.48	0.898979	1.30789		635.66		0.677648
1035.74		0.815967			818.235	1425.85	0.768526	1.33922		1082.64		1.15416
1056.41		0.832257			818.445	2581.02	0.768723	2.42422		978.453		1.04308
1072.56		0.844978			1099.57	1654.71	1.03277	1.55418		801.416		0.854354
1043.54		0.822118			1123.82	1515.15	1.05554	1.4231		750.292		0.799852
1069.67		0.842701			1111.32	1761.33	1.0438	1.65433		854.477		0.910919
994.745		0.783673			789.433	1272.07	0.741474	1.19479		1211.95		1.292
1265.91		0.997299			769.781	1294.4	0.723016	1.21576		1320.8		1.40804
1385.99		1.09191			1039.53	727.108	0.976372	0.682935		1380.82		1.47203
1357.99		1.06984			1145.18	587.569	1.07561	0.551873		1312.74		1.39945
1233.91		0.972089			974.395	618.85	0.915199	0.581254		957.432		1.02068
1233.25		0.971567			1167.63	735.034	1.09669	0.690379		1327.71		1.41541
852.693		0.671763			856.586	847.926	0.804547	0.796413		1492.81		1.59141
1058.76		0.834108			1310.04	1091.33	1.23046	1.02503		1075.31		1.14634
2182.31		1.71925			1104.59	1177.28	1.03748	1.10576		1164.35		1.24127
2145.04		1.68989			1485.19	1152.11	1.39496	1.08211		985.627		1.05073
998.671		0.786766			901.535	985.585	0.846765	0.925709		955.488		1.0186
944.871		0.744382			909.567	1016.61	0.854309	0.95485		714.396		0.761586
940.553		0.74098			998.265	786.579	0.937619	0.738793		659.72		0.703298
1008.56		0.794558			1004.17	861.805	0.943167	0.809449		766.155		0.816763
992.263		0.781718			1208.51	1192.52	1.13509	1.12007		713.222		0.760333
1141.91		0.89961			1180.06	990.481	1.10837	0.930307		1099.28		1.17189
984.123		0.775305			1127.84	1103.61	1.05933	1.03656		752.945		0.802681
996.657		0.785179			1212.71	1299.09	1.13904	1.22017		927.688		0.988966
1231.99		0.970574			765.23	1146.83	0.718741	1.07715		850.661		0.906851
1415.65		1.11527			1117.02	1245.28	1.04916	1.16962		949.899		1.01264
1301.95		1.02569			857.037	1392.1	0.804971	1.30753		752.697		0.802416
1382.62		1.08925			1085.54	1787.69	1.01959	1.67908		536.213		0.571632
1676.46		1.32074			1219.42	1052.65	1.14534	0.988701		1113.92		1.1875
1695.51		1.33574			1254.68	1272.76	1.17846	1.19544		663.923		0.707779
1291.85		1.01774			1325.14	1180.92	1.24464	1.10918		1136.47		1.21154
1116.47		0.879571			1406.01	885.345	1.32059	0.831559		787.543		0.839564
1148.54		0.904834			854.401	924.463	0.802495	0.8683		1006.7		1.0732
1281.43		1.00952			906.753	1240.78	0.851666	1.1654		942.023		1.00425
1224.42		0.964618			918.506	1260.84	0.862705	1.18425		699.048		0.745223
1134.74		0.893965			898.198	1375.89	0.843631	1.29231		1249.31		1.33183
1185.17		0.933694			1003.15	1327.01	0.942203	1.2464		414.556		0.44194
1228.23		0.967615			1092.36	1368.09	1.02599	1.28498		411.407		0.438583
					1052.21	1396.79	0.988284	1.31193		690.405		0.736009
					1051.51	1449.51	0.987633	1.36145		550.163		0.586504
					1846.91	1193.55	1.7347	1.12104		777.939		0.829325
					1735.64	1360.12	1.6302	1.27749		753.096		0.802842
					1213.49	1674.83	1.13977	1.57308		881.082		0.939282
					1218.68	1187.01	1.14464	1.1149		893.379		0.952391
					1424.1	1101.52	1.33759	1.0346		921.41		0.982273
					1230.34	803.942	1.1556	0.755101		896.783		0.95602
					1249.47	800.867	1.17357	0.752213		955.354		1.01846
					1341.86	777.341	1.26034	0.730117		949.111		1.0118
					1027.14	838.017	0.964743	0.787106		965.06		1.02881
					1126.01	1361.02	1.0576	1.27834		763.675		0.814119
					1234	1351.55	1.15903	1.26944		792.684		0.845045
					1267.06	1440.8	1.19008	1.35327		862.181		0.919132
					1234.85	1578.44	1.15983	1.48255		863.596		0.92064
					1141.24	1666.62	1.07191	1.56537		810.575		0.864117
					1060.3	1796.84	0.99589	1.68768		929.369		0.990759
					823.834	1456.69	0.773785	1.36819		817.662		0.871672
					853.419	1313.25	0.801572	1.23347		820.316		0.874501
					1091.86	977.327	1.02553	0.917953		870.063		0.927535
					1281.35	986.459	1.2035	0.92653		855.767		0.912295
					1324.46	1298.01	1.24399	1.21916		720.817		0.768431
					1242.54	645.573	1.16705	0.606353		665.467		0.709424
					1293.8	637.959	1.2152	0.599202		918.34		0.979
					859.527	1474.06	0.807309	1.3845		1018.11		1.08536
					863.389	1552.15	0.810936	1.45785		906.357		0.966226
					860.586	1109.45	0.808303	1.04205		1017.39		1.08459
					947.027	1700.25	0.889493	1.59696		1004.71		1.07108
					1381.18	1121.36	1.29727	1.05324		799.721		0.852546
					1383.07	1266.1	1.29905	1.18918		829.118		0.883885
					1881.44	1176.98	1.76714	1.10548		917.191		0.977775
					1789.86	1390.65	1.68112	1.30616		878.862		0.936915
					1369.92	1316.23	1.2867	1.23627		924.947		0.986044
					1148.42	1239.24	1.07866	1.16395		901.301		0.960836
					1605.57	1579.67	1.50803	1.48371		782.335		0.834012
					1143.64	1416.69	1.07416	1.33062		816.233		0.870149
					769.259	1663.52	0.722525	1.56245		527.661		0.562516
					797.078	3447.29	0.748654	3.23786		627.242		0.668675
					1049.58	1674.27	0.985816	1.57255		605.975		0.646003
					1047.86	4082.29	0.984196	3.83429		950.497		1.01328
					1179.1	594.431	1.10747	0.558319		861.09		0.917969
					1198.38	1076.23	1.12558	1.01085		899.476		0.95889
					1039.4	1044.58	0.976257	0.981119		3927.6		4.18703
					1047.15	1039.3	0.983533	0.976164		540.641		0.576353
					1242.02	850.101	1.16656	0.798456		548.357		0.584579
					1095.17	787.421	1.02863	0.739584		839.568		0.895025
					1055.67	931.775	0.991533	0.875168		864.314		0.921406
					1047.27	899.464	0.983645	0.84482		858.071		0.914751
					1141.84	835.984	1.07247	0.785197		850.035		0.906183
					1119.84	726.123	1.05181	0.68201		919.716		0.980468
					1302.57	1136.38	1.22344	1.06734		1102.19		1.17499
					1346.14	1134.94	1.26436	1.06599		1140.4		1.21572
					1294.01	999.731	1.21539	0.938996		772.663		0.823701
					1237.92	1014.64	1.16271	0.953		778.801		0.830244
					1515.99	1057.95	1.42389	0.993682		680.816		0.725787
					1343.49	1038.35	1.26187	0.975269		710.455		0.757384
					1412.88	985.157	1.32704	0.925307		673.843		0.718354
					1450.05	1189.48	1.36196	1.11721		718.634		0.766103
					1156.46	1258.19	1.08621	1.18176		1138.69		1.2139
					1235.06	1278.56	1.16002	1.20089		1014.36		1.08137
					1014.72	1364.17	0.953075	1.2813		713.502		0.760633
					1014.69	1550.06	0.953042	1.45589		839.718		0.895186
					1004.11	888.016	0.943108	0.834067		867.147		0.924426
					1025.13	1136.77	0.962851	1.06771		905.831		0.965666
					1219.2	1513.01	1.14513	1.4211		556.385		0.593137
					1304.23	1731	1.225	1.62584		563.07		0.600263
					1303.84	498.305	1.22463	0.468032		971.803		1.03599
					1321.81	751.47	1.24151	0.705816		1031.09		1.0992
					1101.64	784.167	1.03471	0.736528		1215.62		1.29591
					1145.22	1244.64	1.07564	1.16902		1283.09		1.36785
					1121.53	1412.72	1.0534	1.3269		1127.88		1.20238
					1144.8	1376.07	1.07525	1.29247		1127.26		1.20172
					1112.95	1556.49	1.04533	1.46194		747.699		0.797088
					770.658	1004.4	0.723839	0.943384		718.585		0.766051
					1211.42	1087.04	1.13783	1.021		886.422		0.944974
					1282.91	1152.07	1.20497	1.08208		928.523		0.989856
					1280.9	1289.35	1.20308	1.21102		452.277		0.482152
					1098.6	1288.08	1.03186	1.20983		439.706		0.468751
					1042.66	1053.92	0.979319	0.989892		696.984		0.743023
					1054.59	1345.11	0.990526	1.26339		739.585		0.788438
					1150.3	1297.49	1.08041	1.21866		736.931		0.785609
						1135.1		1.06614		735.148		0.783708
						1149.6		1.07976		753.223		0.802977
						1610.51		1.51267		871.844		0.929433
						1537.65		1.44424		595.658		0.635004
						1305.47		1.22616		597.674		0.637153
						1183.38		1.11148		717.645		0.765049
						1098.59		1.03185		717.487		0.764881
						1253.02		1.1769		424.021		0.452029
						1385.31		1.30115		694.89		0.740791
						994.408		0.933996		686.081		0.7314
						1093.88		1.02742		1023.45		1.09106
						876.408		0.823165		873.248		0.93093
						986.67		0.926728		932.232		0.99381
						1043.25		0.979871		971.991		1.0362
						1112.2		1.04464		931.59		0.993126
						1167.43		1.0965		1056.97		1.12679
						1217.58		1.14361		991.494		1.05699
						858.516		0.80636		889.423		0.948173
						2882.07		2.70698		1259.79		1.34301
						2275.44		2.1372		928.284		0.989601
						3969.95		3.72877		1249.34		1.33186
						1546.95		1.45297		3769.74		4.01875
						1398.94		1.31395		1296.26		1.38189
						912.525		0.857088		1005.92		1.07236
						1127.47		1.05898		1090.83		1.16289
						1193.91		1.12138		1382.88		1.47422
						896.388		0.841931		954.429		1.01747
						1184.76		1.11278		939.348		1.0014
						685.255		0.643624		678.317		0.723123
						711.49		0.668266		1010.55		1.0773
						1172.89		1.10164		1084.79		1.15645
						1258.72		1.18225		792.987		0.845367
						1090.97		1.02469		842.494		0.898144
						1170.14		1.09905		881.635		0.939872
						834.495		0.783798		680.477		0.725425
						831.974		0.78143
						1029.44		0.966902
						1122.38		1.05419
						1164.93		1.09416
						1471.11		1.38173
						1569.75		1.47438
						1134.08		1.06518
						1070.96		1.0059
						996.752		0.936198
						1665.26		1.56409
						1824.36		1.71353
						1126.42		1.05799
						1182.5		1.11067
						908.588		0.85339
						968.227		0.909406
						982.009		0.92235
						636.052		0.597411
						635.422		0.596819
						634.815		0.596249
						617.101		0.579611
						1030.01		0.967439
						1174.41		1.10306
						1186.95		1.11484
						1305.98		1.22664
						1150.01		1.08014
						1156.54		1.08628
						1234.15		1.15917
						1452.15		1.36393
						1526.67		1.43392
						1563.07		1.46811
						980.497		0.92093
						976.274		0.916964
						1113.09		1.04547
						1116.04		1.04824
						1664.56		1.56343
						1549.13		1.45502
						635.653		0.597036
						685.368		0.643731
						883.029		0.829383
						892.074		0.837879
						652.423		0.612787
						989.56		0.929442
						950.327		0.892593
						845.581		0.79421
						945.258		0.887832
						1069.1		1.00415
						1098.08		1.03137
						1036.57		0.973594
						1089.91		1.02369
						1098.54		1.0318
						864.862		0.81232
						565.764		0.531393
						961.433		0.903024
						1122.35		1.05417
						1351.58		1.26947
						628.626		0.590436
						1009.39		0.948069
						1092.4		1.02604
						1103.39		1.03636
						1002.78		0.941855
						787.07		0.739254
						772.55		0.725616
						1132.98		1.06415
						1259.67		1.18315
						699.778		0.657266
						787.109		0.739291
						1296.26		1.21751
						928.794		0.872368
						1266.81		1.18985
						1400.16		1.31509
						709.819		0.666697
						829.124		0.778753
						605.471		0.568688
						1077.67		1.0122
						1055.22		0.991115
						1107.24		1.03997
						1008.93		0.947637
						1098.09		1.03138
						1115.24		1.04748
						1249.21		1.17332
						1278.07		1.20042
						1527.69		1.43488
						1239.4		1.16411
						1154.69		1.08454
						1352.3		1.27014
						1290.34		1.21195
						720.186		0.676433
						784.237		0.736593
						617.854		0.580319
						720.763		0.676976
						1156.22		1.08597
						1341.69		1.26018
						1081.01		1.01534
						1188.89		1.11666
						1114.62		1.04691
						971.711		0.912678
						1035.37		0.972473
						478.993		0.449893
						1133.88		1.06499
						1178.03		1.10646
						1451.79		1.36359
						1404.46		1.31914
						1275.93		1.19841
						1273.73		1.19635
						1193.33		1.12083
						688.366		0.646547
						606.914		0.570043
						973.679		0.914527
						957.549		0.899376
						1146.27		1.07663
						983.809		0.924041
						1338.25		1.25695
						1413.5		1.32763
						1854.39		1.74173
						1479.92		1.39001
						1539.98		1.44642
						1855.5		1.74278
						2204.7		2.07076
						2282.19		2.14354
						2777.73		2.60897
						2536.86		2.38274
						734.562		0.689936
						770.535		0.723723
						640.204		0.60131
						642.48		0.603448
						933.092		0.876405
						962.884		0.904387
						867.596		0.814888
						848.343		0.796805
						843.785		0.792524
						840.364		0.78931
						1494		1.40324
						1495.01		1.40418
						1917.05		1.80059
						2023.57		1.90063
						877.929		0.824593
						969.488		0.91059
						1010.23		0.948855
						945.985		0.888515
						957.157		0.899008
						944.265		0.886899
						926.625		0.870331
						555.315		0.521578
						557.271		0.523415
						778.235		0.730956
						809.284		0.760118
						1291.78		1.21331
						1168.64		1.09764
						1271.95		1.19468
						1269.7		1.19256
						1214.06		1.14031
						1099.78		1.03296
						1467.29		1.37815
						1425.11		1.33854
						1131.41		1.06268
						1223.25		1.14894
						1129.97		1.06132
						1176.79		1.1053
						1014.15		0.95254
						1084.63		1.01874
						837.623		0.786736
						836.813		0.785976
						1112.45		1.04487
						1172.67		1.10143
						1328.76		1.24804
						1389.81		1.30538
						968.111		0.909296
						1001.51		0.940663
						1315.1		1.2352
						1482.46		1.3924
						606.624		0.56977
						580.599		0.545327
						1293.1		1.21454
						1296.03		1.21729
						1148.67		1.07888
						1077.71		1.01224
						474.01		0.445213
						989.694		0.929569
						1137.55		1.06844
						1082.96		1.01717
						1029.12		0.966596
						1083.53		1.0177
						893.14		0.83888
						779.757		0.732385
						1041.1		0.977856
						944.708		0.887315
						1146.45		1.0768
						1100.65		1.03378
